# Supplementary material for: Taxonomy assignment approach determines the efficiency of identification of OTUs in marine nematodes
Source: PubMed Central journal article supplement (PMC5579096; doi:10.1098/rsos.170315), 2017-08-16
Supplement: rsos170315supp4.pdf [file rsos170315supp4.pdf]

**Supplementary file for the article:**

Holovachov O, Haenel Q, Bourlat SJ, Jondelius U. Taxonomy assignment approach determines the efficiency of identification of OTUs in marine nematodes. *Royal Society Open Science*.

**Supplementary Table 1.** GenBank accession numbers and classification of sequences used in reference datasets for the tree-based and phylogeny-based taxonomy assignment algorithms.

|     | <b>Acc. number</b> | <b>Family</b>    | <b>Genus</b>              | <b>Species</b>          |
|-----|--------------------|------------------|---------------------------|-------------------------|
| 1.  | AF202164           | Anguinidae       | <i>Subanguina</i>         | <i>radicicola</i>       |
| 2.  | EU669912           | Anguinidae       | <i>Halenchus</i>          | <i>fucicola</i>         |
| 3.  | JQ429768           | Anguinidae       | <i>Ditylenchus</i>        | <i>drepanocercus</i>    |
| 4.  | KJ636296           | Anguinidae       | <i>Ditylenchus</i>        | <i>dipsaci</i>          |
| 5.  | AF083020           | Rhabditidae      | <i>Pellioiditis</i>       | <i>mediterranea</i>     |
| 6.  | AF083021           | Rhabditidae      | <i>Pellioiditis</i>       | <i>marina</i>           |
| 7.  | U94366             | Ascarididae      | <i>Ascaris</i>            | <i>lumbricoides</i>     |
| 8.  | DQ118535           | Dracunculidae    | <i>Anguillicoloides</i>   | <i>crassus</i>          |
| 9.  | U94380             | Anisakidae       | <i>Pseudoterranova</i>    | <i>decipiens</i>        |
| 10. | AY284683           | Teratocephalidae | <i>Teratocephalus</i>     | <i>terrestris</i>       |
| 11. | AF036607           | Teratocephalidae | <i>Teratocephalus</i>     | <i>lirellus</i>         |
| 12. | AF202155           | Plectidae        | <i>Tylocephalus</i>       | <i>auriculatus</i>      |
| 13. | AF037628           | Plectidae        | <i>Plectus</i>            | <i>acuminatus</i>       |
| 14. | AF036602           | Plectidae        | <i>Plectus</i>            | <i>aquatilis</i>        |
| 15. | AY284697           | Plectidae        | <i>Anaplectus</i>         | <i>grandepapillatus</i> |
| 16. | AY593931           | Chronogastridae  | <i>Kischkenema</i>        | <i>boettgeri</i>        |
| 17. | FJ040456           | Chronogastridae  | <i>Chronogaster</i>       | <i>typica</i>           |
| 18. | KJ636361           | Chronogastridae  | <i>Chronogaster</i>       | sp.                     |
| 19. | EF591319           | Aphanolaimidae   | <i>Aphanonchus</i>        | cf. <i>europaeus</i>    |
| 20. | AY593932           | Aphanolaimidae   | <i>Aphanolaimus</i>       | <i>aquaticus</i>        |
| 21. | KJ636380           | Aphanolaimidae   | <i>Paraphanolaimus</i>    | <i>behningi</i>         |
| 22. | EF591320           | Leptolaimidae    | <i>Paraplectonema</i>     | <i>pedunculatum</i>     |
| 23. | EF591323           | Leptolaimidae    | <i>Leptolaimus</i>        | sp.                     |
| 24. | EF591324           | Leptolaimidae    | <i>Leptolaimus</i>        | sp.                     |
| 25. | FJ040458           | Leptolaimidae    | <i>Leptolaimus</i>        | sp.                     |
| 26. | FJ040454           | Ohridiidae       | <i>Domorganus</i>         | <i>macronephriticus</i> |
| 27. | EF591321           | Camacolaimidae   | <i>Setostephanolaimus</i> | <i>spartinae</i>        |
| 28. | JX678597           | Camacolaimidae   | <i>Alaimella</i>          | sp.                     |
| 29. | FJ969115           | Camacolaimidae   | <i>Anguinoides</i>        | sp.                     |
| 30. | JX678601           | Camacolaimidae   | <i>Onchium</i>            | sp.                     |
| 31. | EF591328           | Camacolaimidae   | <i>Onchium</i>            | sp.                     |
| 32. | EF591322           | Camacolaimidae   | <i>Deontolaimus</i>       | <i>papillatus</i>       |
| 33. | FJ040457           | Camacolaimidae   | <i>Deontolaimus</i>       | <i>papillatus</i>       |

|     | <b>Acc. number</b> | <b>Family</b>     | <b>Genus</b>           | <b>Species</b>          |
|-----|--------------------|-------------------|------------------------|-------------------------|
| 34. | JX678599           | Camacolaimidae    | <i>Deontolaimus</i>    | sp.                     |
| 35. | JX678598           | Camacolaimidae    | <i>Deontolaimus</i>    | sp.                     |
| 36. | EF591325           | Camacolaimidae    | <i>Deontolaimus</i>    | sp.                     |
| 37. | EF591326           | Camacolaimidae    | <i>Procamacolaimus</i> | sp.                     |
| 38. | JN625216           | Benthimermithidae | <i>Trophomera</i>      | sp.                     |
| 39. | FJ040460           | Axonolaimidae     | <i>Ascolaimus</i>      | cf. <i>elongatus</i>    |
| 40. | EF591330           | Axonolaimidae     | <i>Ascolaimus</i>      | cf. <i>elongatus</i>    |
| 41. | AY854231           | Axonolaimidae     | <i>Ascolaimus</i>      | <i>elongatus</i>        |
| 42. | AY854232           | Axonolaimidae     | <i>Axonolaimus</i>     | <i>helgolandicus</i>    |
| 43. | EF591331           | Axonolaimidae     | <i>Axonolaimus</i>     | sp.                     |
| 44. | FJ040461           | Axonolaimidae     | <i>Axonolaimus</i>     | sp.                     |
| 45. | AY854233           | Axonolaimidae     | <i>Odontophora</i>     | <i>rectangula</i>       |
| 46. | FJ040459           | Axonolaimidae     | <i>Odontophora</i>     | sp.                     |
| 47. | EF591335           | Comesomatidae     | <i>Sabatieria</i>      | <i>pulchra</i>          |
| 48. | FJ040466           | Comesomatidae     | <i>Sabatieria</i>      | <i>pulchra</i>          |
| 49. | AY854240           | Comesomatidae     | <i>Setosabatieria</i>  | <i>hilarula</i>         |
| 50. | AY854237           | Comesomatidae     | <i>Sabatieria</i>      | <i>punctata</i>         |
| 51. | AY854236           | Comesomatidae     | <i>Sabatieria</i>      | <i>punctata</i>         |
| 52. | AY854234           | Comesomatidae     | <i>Sabatieria</i>      | <i>celtica</i>          |
| 53. | AY854239           | Comesomatidae     | <i>Sabatieria</i>      | sp.                     |
| 54. | AY593939           | Diplopeltidae     | <i>Cylindrolaimus</i>  | <i>communis</i>         |
| 55. | FJ969121           | Diplopeltidae     | <i>Cylindrolaimus</i>  | sp.                     |
| 56. | AF202149           | Diplopeltidae     | <i>Cylindrolaimus</i>  | sp.                     |
| 57. | EF591329           | Diplopeltidae     | <i>Diplopeltula</i>    | sp.                     |
| 58. | EF591334           | Monhysteridae     | <i>Geomonhystera</i>   | <i>villosa</i>          |
| 59. | FJ040465           | Monhysteridae     | <i>Geomonhystera</i>   | sp.                     |
| 60. | KJ636213           | Monhysteridae     | <i>Geomonhystera</i>   | sp.                     |
| 61. | HF572952           | Monhysteridae     | <i>Halomonhystera</i>  | sp.                     |
| 62. | AJ966485           | Monhysteridae     | <i>Halomonhystera</i>  | <i>disjuncta</i>        |
| 63. | AY593938           | Monhysteridae     | <i>Monhystera</i>      | <i>riemanni</i>         |
| 64. | FJ969130           | Monhysteridae     | <i>Monhystera</i>      | <i>paludicola</i>       |
| 65. | KJ636247           | Monhysteridae     | <i>Monhystera</i>      | cf. <i>paludicola</i>   |
| 66. | KJ636258           | Monhysteridae     | <i>Monhystera</i>      | cf. <i>paludicola</i>   |
| 67. | KJ636246           | Monhysteridae     | <i>Monhystera</i>      | cf. <i>stagnalis</i>    |
| 68. | KJ636259           | Monhysteridae     | <i>Monhystera</i>      | <i>stagnalis</i>        |
| 69. | KJ636233           | Monhysteridae     | <i>Monhystera</i>      | sp.                     |
| 70. | KJ636250           | Monhysteridae     | <i>Eumonhystera</i>    | cf. <i>vulgaris</i>     |
| 71. | KJ636238           | Monhysteridae     | <i>Eumonhystera</i>    | <i>filiformis</i>       |
| 72. | AY593937           | Monhysteridae     | <i>Eumonhystera</i>    | <i>filiformis</i>       |
| 73. | KJ636219           | Monhysteridae     | <i>Eumonhystera</i>    | <i>filiformis</i>       |
| 74. | KJ636252           | Monhysteridae     | <i>Eumonhystera</i>    | cf. <i>longicaudata</i> |

|      | Acc. number | Family          | Genus                    | Species               |
|------|-------------|-----------------|--------------------------|-----------------------|
| 75.  | AJ966482    | Monhysteridae   | <i>Diplolaimella</i>     | <i>dievengatensis</i> |
| 76.  | AF036611    | Monhysteridae   | <i>Diplolaimelloides</i> | <i>meyli</i>          |
| 77.  | AJ966505    | Xyalidae        | <i>Theristus</i>         | <i>acer</i>           |
| 78.  | AY284695    | Xyalidae        | <i>Theristus</i>         | <i>agilis</i>         |
| 79.  | AF047889    | Xyalidae        | <i>Daptonema</i>         | <i>procerus</i>       |
| 80.  | AY854226    | Xyalidae        | <i>Daptonema</i>         | <i>setosum</i>        |
| 81.  | AY854225    | Xyalidae        | <i>Daptonema</i>         | <i>oxycerca</i>       |
| 82.  | AY854223    | Xyalidae        | <i>Daptonema</i>         | <i>hirsutum</i>       |
| 83.  | AY854224    | Xyalidae        | <i>Daptonema</i>         | <i>normandicum</i>    |
| 84.  | KC920423    | Xyalidae        | <i>Zygonemella</i>       | <i>striata</i>        |
| 85.  | AJ966491    | Xyalidae        | <i>Metadesmolaimus</i>   | sp.                   |
| 86.  | AY854228    | Sphaerolaimidae | <i>Sphaerolaimus</i>     | <i>hirsutus</i>       |
| 87.  | EF591333    | Linhomoeidae    | <i>Desmolaimus</i>       | sp.                   |
| 88.  | EF591332    | Linhomoeidae    | <i>Desmolaimus</i>       | sp.                   |
| 89.  | AY854229    | Linhomoeidae    | <i>Desmolaimus</i>       | <i>zeelandicus</i>    |
| 90.  | AY854230    | Linhomoeidae    | <i>Terschellingia</i>    | <i>longicaudata</i>   |
| 91.  | DQ408760    | Siphonolaimidae | <i>Astomonema</i>        | sp.                   |
| 92.  | DQ408761    | Siphonolaimidae | <i>Astomonema</i>        | sp.                   |
| 93.  | DQ408759    | Siphonolaimidae | <i>Astomonema</i>        | sp.                   |
| 94.  | JN815318    | Tarvaiidae      | <i>Tarvaia</i>           | sp.                   |
| 95.  | JN815319    | Ceramonematidae | <i>Ceramonema</i>        | <i>inguinispina</i>   |
| 96.  | JN815320    | Ceramonematidae | <i>Ceramonema</i>        | <i>altogolfi</i>      |
| 97.  | JN815321    | Ceramonematidae | <i>Ceramonema</i>        | <i>reticulatum</i>    |
| 98.  | FJ460256    | Desmoscolecidae | <i>Tricoma</i>           | sp.                   |
| 99.  | FJ460257    | Desmoscolecidae | <i>Tricoma</i>           | sp.                   |
| 100. | FJ460255    | Desmoscolecidae | <i>Paratricoma</i>       | sp.                   |
| 101. | FJ460252    | Desmoscolecidae | <i>Desmoscolex</i>       | sp.                   |
| 102. | EF591342    | Desmoscolecidae | <i>Desmoscolex</i>       | sp.                   |
| 103. | JN815322    | Desmoscolecidae | <i>Desmoscolex</i>       | sp.                   |
| 104. | AY854203    | Cyartonematidae | <i>Cyartonema</i>        | <i>elegans</i>        |
| 105. | FJ182217    | Draconematidae  | <i>Draconema</i>         | <i>japonicum</i>      |
| 106. | FJ182220    | Draconematidae  | <i>Paradraconema</i>     | <i>jejuense</i>       |
| 107. | FJ182216    | Draconematidae  | <i>Dracograllus</i>      | sp.                   |
| 108. | FJ182223    | Draconematidae  | <i>Prochaetosoma</i>     | sp.                   |
| 109. | FJ182218    | Epsilonematidae | <i>Epsilonema</i>        | sp.                   |
| 110. | AY854217    | Desmodoridae    | <i>Spirinia</i>          | <i>parasitifera</i>   |
| 111. | EF591339    | Desmodoridae    | <i>Metachromadora</i>    | sp.                   |
| 112. | AY854216    | Desmodoridae    | <i>Metachromadora</i>    | <i>remanei</i>        |
| 113. | FJ040469    | Desmodoridae    | <i>Metachromadora</i>    | sp.                   |
| 114. | Y16911      | Desmodoridae    | <i>Acanthopharynx</i>    | <i>micans</i>         |
| 115. | AF047891    | Desmodoridae    | <i>Chromadoropsis</i>    | <i>vivipara</i>       |

|      | Acc. number | Family           | Genus                   | Species               |
|------|-------------|------------------|-------------------------|-----------------------|
| 116. | AY854215    | Desmodoridae     | <i>Desmodora</i>        | <i>communis</i>       |
| 117. | Y16913      | Desmodoridae     | <i>Desmodora</i>        | <i>ovigera</i>        |
| 118. | Y16923      | Desmodoridae     | <i>Xyzzors</i>          | sp.                   |
| 119. | KJ414468    | Desmodoridae     | <i>Leptonemella</i>     | <i>vicina</i>         |
| 120. | KP943962    | Desmodoridae     | <i>Leptonemella</i>     | cf. <i>juliae</i>     |
| 121. | KP943961    | Desmodoridae     | <i>Leptonemella</i>     | <i>aphanothecae</i>   |
| 122. | Y16915      | Desmodoridae     | <i>Eubostrichus</i>     | <i>dianae</i>         |
| 123. | Y16917      | Desmodoridae     | <i>Eubostrichus</i>     | <i>topiarius</i>      |
| 124. | Y16916      | Desmodoridae     | <i>Eubostrichus</i>     | <i>parasitiferus</i>  |
| 125. | KP943956    | Desmodoridae     | <i>Eubostrichus</i>     | cf. <i>dianae</i>     |
| 126. | Y16918      | Desmodoridae     | <i>Laxus</i>            | <i>cosmopolitus</i>   |
| 127. | KT826596    | Desmodoridae     | <i>Laxus</i>            | <i>oneistus</i>       |
| 128. | Y16919      | Desmodoridae     | <i>Laxus</i>            | <i>oneistus</i>       |
| 129. | Y16922      | Desmodoridae     | <i>Stilbonema</i>       | <i>majum</i>          |
| 130. | KJ414465    | Desmodoridae     | <i>Robbea</i>           | <i>ruetzleri</i>      |
| 131. | KJ414466    | Desmodoridae     | <i>Robbea</i>           | <i>hypermnestra</i>   |
| 132. | Y16921      | Desmodoridae     | <i>Robbea</i>           | <i>hypermnestra</i>   |
| 133. | KP943964    | Desmodoridae     | <i>Robbea</i>           | <i>hypermnestra</i>   |
| 134. | KP943955    | Desmodoridae     | <i>Catanema</i>         | sp.                   |
| 135. | Y16912      | Desmodoridae     | <i>Catanema</i>         | sp.                   |
| 136. | AY854218    | Microlaimidae    | <i>Calomicrolaimus</i>  | <i>parahonestus</i>   |
| 137. | AY854219    | Microlaimidae    | <i>Calomicrolaimus</i>  | sp.                   |
| 138. | AY854220    | Microlaimidae    | <i>Molgolaimus</i>      | <i>demani</i>         |
| 139. | FJ040477    | Microlaimidae    | <i>Prodesmodora</i>     | sp.                   |
| 140. | FJ040476    | Microlaimidae    | <i>Prodesmodora</i>     | sp.                   |
| 141. | JN815323    | Haliplectidae    | <i>Haliplectus</i>      | sp.                   |
| 142. | FJ969123    | Haliplectidae    | <i>Haliplectus</i>      | cf. <i>dorsalis</i>   |
| 143. | AY284715    | Selachinematidae | <i>Choanolaimus</i>     | <i>psammophilus</i>   |
| 144. | FJ040467    | Selachinematidae | <i>Choanolaimus</i>     | <i>psammophilus</i>   |
| 145. | FJ040468    | Selachinematidae | <i>Synonchiella</i>     | sp.                   |
| 146. | EF591338    | Selachinematidae | <i>Halichoanolaimus</i> | sp.                   |
| 147. | AY593942    | Ethmolaimidae    | <i>Ethmolaimus</i>      | <i>pratensis</i>      |
| 148. | FJ040475    | Ethmolaimidae    | <i>Ethmolaimus</i>      | <i>pratensis</i>      |
| 149. | AY593941    | Achromadoridae   | <i>Achromadora</i>      | <i>ruricola</i>       |
| 150. | AY593940    | Achromadoridae   | <i>Achromadora</i>      | cf. <i>terricola</i>  |
| 151. | AY854205    | Chromadoridae    | <i>Chromadora</i>       | <i>nudicapitata</i>   |
| 152. | AY854206    | Chromadoridae    | <i>Chromadora</i>       | sp.                   |
| 153. | AY854209    | Chromadoridae    | <i>Dichromadora</i>     | sp.                   |
| 154. | FJ040506    | Chromadoridae    | <i>Dichromadora</i>     | sp.                   |
| 155. | FJ969119    | Chromadoridae    | <i>Chromadorita</i>     | <i>leuckarti</i>      |
| 156. | FJ969138    | Chromadoridae    | <i>Punctodora</i>       | <i>ratzeburgensis</i> |

|      | <b>Acc. number</b> | <b>Family</b>    | <b>Genus</b>            | <b>Species</b>        |
|------|--------------------|------------------|-------------------------|-----------------------|
| 157. | EF591341           | Chromadoridae    | <i>Prochromadora</i>    | sp.                   |
| 158. | FJ040473           | Chromadoridae    | <i>Chromadorita</i>     | cf. <i>leuckarti</i>  |
| 159. | KJ636254           | Chromadoridae    | <i>Chromadorita</i>     | <i>leuckarti</i>      |
| 160. | KJ636214           | Chromadoridae    | <i>Chromadorita</i>     | <i>leuckarti</i>      |
| 161. | AY854208           | Chromadoridae    | <i>Chromadorita</i>     | <i>tentabundum</i>    |
| 162. | AY854207           | Chromadoridae    | <i>Chromadorina</i>     | <i>germanica</i>      |
| 163. | KJ636220           | Chromadoridae    | <i>Chromadorina</i>     | <i>bioculata</i>      |
| 164. | KJ636221           | Chromadoridae    | <i>Chromadorina</i>     | <i>bioculata</i>      |
| 165. | AY854204           | Chromadoridae    | <i>Atrochromadora</i>   | <i>microlaima</i>     |
| 166. | AY854211           | Chromadoridae    | <i>Spilophorella</i>    | <i>paradoxa</i>       |
| 167. | FJ040472           | Chromadoridae    | <i>Ptycholaimellus</i>  | sp.                   |
| 168. | AJ966495           | Cyatholaimidae   | <i>Paracyatholaimus</i> | <i>intermedius</i>    |
| 169. | FJ969133           | Cyatholaimidae   | <i>Paracyatholaimus</i> | <i>intermedius</i>    |
| 170. | AF036612           | Cyatholaimidae   | <i>Praeacanthonchus</i> | sp.                   |
| 171. | AF047888           | Cyatholaimidae   | <i>Paracanthonchus</i>  | <i>caecus</i>         |
| 172. | AY854214           | Cyatholaimidae   | <i>Praeacanthonchus</i> | <i>punctatus</i>      |
| 173. | AY854213           | Cyatholaimidae   | <i>Cyatholaimus</i>     | sp.                   |
| 174. | JQ071928           | Monoposthiidae   | <i>Nudora</i>           | <i>ilhabelae</i>      |
| 175. | FJ040505           | Monoposthiidae   | <i>Monoposthia</i>      | sp.                   |
| 176. | AY854222           | Monoposthiidae   | <i>Nudora</i>           | <i>bipapillata</i>    |
| 177. | AY284776           | Dorylaimidae     | <i>Dorylaimus</i>       | <i>stagnalis</i>      |
| 178. | AY993978           | Actinolaimidae   | <i>Paractinolaimus</i>  | <i>macrolaimus</i>    |
| 179. | AY284774           | Nygolaimidae     | <i>Paravulvulus</i>     | <i>hartingii</i>      |
| 180. | AY284770           | Nygolaimidae     | <i>Nygolaimus</i>       | cf. <i>brachyuris</i> |
| 181. | KJ636343           | Isolaimiidae     | <i>Isolaimium</i>       | <i>multistriatum</i>  |
| 182. | KJ636356           | Isolaimiidae     | <i>Isolaimium</i>       | <i>multistriatum</i>  |
| 183. | EF207244           | Cryptonchidae    | <i>Cryptonchus</i>      | <i>tristis</i>        |
| 184. | FJ040479           | Cryptonchidae    | <i>Cryptonchus</i>      | sp.                   |
| 185. | FJ969116           | Bathyodontidae   | <i>Bathyodontus</i>     | <i>mirus</i>          |
| 186. | AY552964           | Bathyodontidae   | <i>Bathyodontus</i>     | <i>cylindricus</i>    |
| 187. | AY284765           | Mononchidae      | <i>Mononchus</i>        | <i>aquaticus</i>      |
| 188. | AY297821           | Mononchidae      | <i>Mononchus</i>        | <i>aquaticus</i>      |
| 189. | AJ966493           | Mononchidae      | <i>Mononchus</i>        | <i>truncatus</i>      |
| 190. | FN400892           | Mermithidae      | <i>Isomermis</i>        | <i>lairdi</i>         |
| 191. | AF036641           | Mermithidae      | <i>Mermis</i>           | <i>nigrescens</i>     |
| 192. | AY284729           | Prismatolaimidae | <i>Prismatolaimus</i>   | <i>intermedius</i>    |
| 193. | AF036603           | Prismatolaimidae | <i>Prismatolaimus</i>   | <i>intermedius</i>    |
| 194. | AY593957           | Prismatolaimidae | <i>Prismatolaimus</i>   | <i>dolichurus</i>     |
| 195. | AY284725           | Bastianiidae     | <i>Bastiania</i>        | <i>gracilis</i>       |
| 196. | FJ040487           | Bastianiidae     | <i>Dintheria</i>        | <i>tenuissima</i>     |
| 197. | FJ969141           | Onchulidae       | <i>Stenonchulus</i>     | <i>troglydites</i>    |

|      | <b>Acc. number</b> | <b>Family</b>      | <b>Genus</b>            | <b>Species</b>          |
|------|--------------------|--------------------|-------------------------|-------------------------|
| 198. | AY284731           | Tripylidae         | <i>Tripyla</i>          | <i>cf. filicaudata</i>  |
| 199. | AY284730           | Tripylidae         | <i>Tripyla</i>          | <i>cf. filicaudata</i>  |
| 200. | KJ636224           | Tripylidae         | <i>Tripyla</i>          | <i>glomerans</i>        |
| 201. | GQ503062           | Tripylidae         | <i>Tripyla</i>          | <i>bioblitz</i>         |
| 202. | AY284737           | Tripylidae         | <i>Tripylella</i>       | sp.                     |
| 203. | FJ040488           | Tripylidae         | <i>Tripylella</i>       | sp.                     |
| 204. | AJ966506           | Tobrilidae         | <i>Tobrilus</i>         | <i>gracilis</i>         |
| 205. | KJ636235           | Tobrilidae         | <i>Eutobrilus</i>       | <i>nothus</i>           |
| 206. | KJ636226           | Tobrilidae         | <i>Eutobrilus</i>       | <i>grandipapillatus</i> |
| 207. | KJ636217           | Tobrilidae         | <i>Epitobrilus</i>      | <i>stefanskii</i>       |
| 208. | KJ636231           | Tobrilidae         | <i>Semitobrilus</i>     | <i>pellucidus</i>       |
| 209. | AF047890           | Oncholaimidae      | <i>Pontonema</i>        | <i>vulgare</i>          |
| 210. | AF036642           | Oncholaimidae      | <i>Adoncholaimus</i>    | sp.                     |
| 211. | AY854195           | Oncholaimidae      | <i>Adoncholaimus</i>    | <i>fuscus</i>           |
| 212. | AY854198           | Oncholaimidae      | <i>Viscosia</i>         | <i>viscosa</i>          |
| 213. | AY854197           | Oncholaimidae      | <i>Viscosia</i>         | sp.                     |
| 214. | FJ040494           | Oncholaimidae      | <i>Viscosia</i>         | sp.                     |
| 215. | KR265042           | Oncholaimidae      | <i>Meyersia</i>         | sp.                     |
| 216. | FJ040502           | Enchelidiidae      | <i>Symplocostoma</i>    | sp.                     |
| 217. | AY854199           | Enchelidiidae      | <i>Calyptronema</i>     | <i>maxweberi</i>        |
| 218. | FJ040503           | Enchelidiidae      | <i>Calyptronema</i>     | sp.                     |
| 219. | KR265038           | Enchelidiidae      | <i>Eurystomina</i>      | sp.                     |
| 220. | HM564491           | Enchelidiidae      | <i>Pareurystomina</i>   | sp.                     |
| 221. | HM564435           | Enchelidiidae      | <i>Pareurystomina</i>   | sp.                     |
| 222. | HM564537           | Enchelidiidae      | <i>Bathyeurystomina</i> | sp.                     |
| 223. | HM564602           | Enchelidiidae      | <i>Bathyeurystomina</i> | sp.                     |
| 224. | U88336             | Enoplidae          | <i>Enoplus</i>          | <i>brevis</i>           |
| 225. | Y16914             | Enoplidae          | <i>Enoplus</i>          | <i>meridionalis</i>     |
| 226. | AY854192           | Enoplidae          | <i>Enoplus</i>          | <i>communis</i>         |
| 227. | AY854193           | Thoracostomopsidae | <i>Enoploides</i>       | <i>brunettii</i>        |
| 228. | FJ040490           | Thoracostomopsidae | <i>Enoploides</i>       | sp.                     |
| 229. | KR265034           | Thoracostomopsidae | <i>Enoplolaimus</i>     | sp.                     |
| 230. | HM564466           | Thoracostomopsidae | <i>Enoplolaimus</i>     | sp.                     |
| 231. | HM564427           | Thoracostomopsidae | <i>Enoplolaimus</i>     | sp.                     |
| 232. | HM564422           | Thoracostomopsidae | <i>Enoplolaimus</i>     | sp.                     |
| 233. | KR265037           | Thoracostomopsidae | <i>Epacanthion</i>      | sp.                     |
| 234. | KR265039           | Thoracostomopsidae | <i>Mesacanthion</i>     | sp.                     |
| 235. | HM564625           | Phanodermatidae    | <i>Phanodermopsis</i>   | sp.                     |
| 236. | HM564510           | Phanodermatidae    | <i>Phanodermopsis</i>   | sp.                     |
| 237. | HM564575           | Phanodermatidae    | <i>Phanodermopsis</i>   | sp.                     |
| 238. | HM564523           | Phanodermatidae    | <i>Phanodermopsis</i>   | sp.                     |

|      | <b>Acc. number</b> | <b>Family</b>    | <b>Genus</b>          | <b>Species</b>       |
|------|--------------------|------------------|-----------------------|----------------------|
| 239. | HM564638           | Anticomidae      | <i>Anticoma</i>       | sp.                  |
| 240. | HM564627           | Anticomidae      | <i>Anticoma</i>       | sp.                  |
| 241. | HM564612           | Anticomidae      | <i>Cephalanticoma</i> | sp.                  |
| 242. | FN433905           | Leptosomatidae   | <i>Thoracostoma</i>   | <i>trachygaster</i>  |
| 243. | FN433903           | Leptosomatidae   | <i>Thoracostoma</i>   | <i>microlobatum</i>  |
| 244. | FN433902           | Leptosomatidae   | <i>Pseudocella</i>    | sp.                  |
| 245. | FN433901           | Leptosomatidae   | <i>Pseudocella</i>    | sp.                  |
| 246. | FN433899           | Leptosomatidae   | <i>Deontostoma</i>    | sp.                  |
| 247. | HM564626           | Leptosomatidae   | <i>Leptosomatides</i> | sp.                  |
| 248. | HM564630           | Leptosomatidae   | <i>Synonchus</i>      | sp.                  |
| 249. | HM564581           | Trefusiidae      | <i>Trefusia</i>       | sp.                  |
| 250. | AF329937           | Trefusiidae      | <i>Trefusia</i>       | <i>zostericola</i>   |
| 251. | HM564585           | Trefusiidae      | <i>Trefusia</i>       | sp.                  |
| 252. | HM564478           | Trefusiidae      | <i>Trefusia</i>       | sp.                  |
| 253. | HM564606           | Trefusiidae      | <i>Rhabdocoma</i>     | sp.                  |
| 254. | HM564609           | Trefusiidae      | <i>Rhabdocoma</i>     | sp.                  |
| 255. | AJ966509           | Trefusiidae      | <i>Trischistoma</i>   | <i>monohystera</i>   |
| 256. | AY284735           | Trefusiidae      | <i>Trischistoma</i>   | sp.                  |
| 257. | FJ969142           | Trefusiidae      | <i>Trischistoma</i>   | sp.                  |
| 258. | KJ636223           | Trefusiidae      | <i>Tripylina</i>      | <i>arenicola</i>     |
| 259. | EF197728           | Trefusiidae      | <i>Tripylina</i>      | sp.                  |
| 260. | AJ966476           | Tripyloididae    | <i>Bathylaimus</i>    | <i>assimilis</i>     |
| 261. | FJ040504           | Tripyloididae    | <i>Bathylaimus</i>    | sp.                  |
| 262. | AY854201           | Tripyloididae    | <i>Bathylaimus</i>    | sp.                  |
| 263. | HM564405           | Tripyloididae    | <i>Tripyloides</i>    | sp.                  |
| 264. | AY854202           | Tripyloididae    | <i>Tripyloides</i>    | sp.                  |
| 265. | FJ040491           | Anoplostomatidae | <i>Anoplostoma</i>    | sp.                  |
| 266. | FJ040492           | Anoplostomatidae | <i>Anoplostoma</i>    | sp.                  |
| 267. | AY590149           | Anoplostomatidae | <i>Anoplostoma</i>    | <i>rectospiculum</i> |
| 268. | HM564528           | Anoplostomatidae | <i>Chaetonema</i>     | sp.                  |
| 269. | HM564542           | Anoplostomatidae | <i>Chaetonema</i>     | sp.                  |
| 270. | HM564533           | Anoplostomatidae | <i>Chaetonema</i>     | sp.                  |
| 271. | KR265049           | Rhabdodemaniidae | <i>Rhabdodemia</i>    | sp.                  |
| 272. | FJ040501           | Oxystominidae    | <i>Halalaimus</i>     | sp.                  |
| 273. | HM564589           | Oxystominidae    | <i>Halalaimus</i>     | sp.                  |
| 274. | HM564540           | Oxystominidae    | <i>Halalaimus</i>     | sp.                  |
| 275. | HM564652           | Oxystominidae    | <i>Halalaimus</i>     | sp.                  |
| 276. | HM564521           | Oxystominidae    | <i>Halalaimus</i>     | sp.                  |
| 277. | HM564420           | Oxystominidae    | <i>Halalaimus</i>     | sp.                  |
| 278. | HM564481           | Oxystominidae    | <i>Oxystomina</i>     | sp.                  |
| 279. | HM564548           | Oxystominidae    | <i>Oxystomina</i>     | sp.                  |

|      | <b>Acc. number</b> | <b>Family</b>  | <b>Genus</b>           | <b>Species</b>         |
|------|--------------------|----------------|------------------------|------------------------|
| 280. | HM564403           | Oxystominidae  | <i>Oxystomina</i>      | sp.                    |
| 281. | HM564651           | Oxystominidae  | <i>Oxystomina</i>      | sp.                    |
| 282. | FJ040499           | Oxystominidae  | <i>Oxystomina</i>      | sp.                    |
| 283. | FJ040498           | Oxystominidae  | <i>Oxystomina</i>      | sp.                    |
| 284. | FJ040500           | Oxystominidae  | <i>Thalassoalaimus</i> | <i>pirum</i>           |
| 285. | HM564634           | Oxystominidae  | <i>Thalassoalaimus</i> | sp.                    |
| 286. | HM564650           | Oxystominidae  | <i>Litinium</i>        | sp.                    |
| 287. | HM564649           | Oxystominidae  | <i>Litinium</i>        | sp.                    |
| 288. | HM564629           | Oxystominidae  | <i>Litinium</i>        | sp.                    |
| 289. | AY284738           | Alaimidae      | <i>Alaimus</i>         | <i>parvus</i>          |
| 290. | AJ966514           | Alaimidae      | <i>Alaimus</i>         | sp.                    |
| 291. | FJ040489           | Alaimidae      | <i>Alaimus</i>         | sp.                    |
| 292. | AY284739           | Alaimidae      | <i>Paramphidelus</i>   | <i>hortens</i>         |
| 293. | FJ040496           | Ironidae       | <i>Ironus</i>          | sp.                    |
| 294. | AJ966487           | Ironidae       | <i>Ironus</i>          | <i>dentifurcatus</i>   |
| 295. | FJ040495           | Ironidae       | <i>Ironus</i>          | <i>longicaudatus</i>   |
| 296. | KJ636218           | Ironidae       | <i>Ironus</i>          | <i>macramphis</i>      |
| 297. | HM564604           | Ironidae       | <i>Dolicholaimus</i>   | sp.                    |
| 298. | JQ071931           | Ironidae       | <i>Trissonchulus</i>   | sp.                    |
| 299. | JQ071933           | Ironidae       | <i>Trissonchulus</i>   | sp.                    |
| 300. | AY854200           | Ironidae       | <i>Syringolaimus</i>   | <i>striatocaudatus</i> |
| 301. | FJ040497           | Ironidae       | <i>Syringolaimus</i>   | sp.                    |
| 302. | KJ636366           | Rhabdolaimidae | <i>Rhabdolaimus</i>    | <i>terrestris</i>      |
| 303. | FJ969139           | Rhabdolaimidae | <i>Rhabdolaimus</i>    | <i>aquaticus</i>       |
| 304. | AY552965           | Campydoridae   | <i>Campydora</i>       | <i>demonstrans</i>     |
| 305. | FJ969118           | Campydoridae   | <i>Campydora</i>       | <i>demonstrans</i>     |
| 306. | X87984             | Priapulidae    | <i>Priapulus</i>       | <i>caudatus</i>        |
| 307. | X80234             | Priapulidae    | <i>Priapulus</i>       | <i>caudatus</i>        |
| 308. | AF342790           | Priapulidae    | <i>Halicryptus</i>     | <i>spinulosus</i>      |
