# Supplementary material for: Taxonomy assignment approach determines the efficiency of identification of OTUs in marine nematodes
Source: PubMed Central journal article supplement (PMC5579096; doi:10.1098/rsos.170315), 2017-08-16
Supplement: rsos170315supp5.pdf [file rsos170315supp5.pdf]

**Supplementary file for the article:**

Holovachov O, Haenel Q, Bourlat SJ, Jondelius U. Taxonomy assignment approach determines the efficiency of identification of OTUs in marine nematodes. *Royal Society Open Science*.

**Supplementary Table 2.** Taxonomic composition and relative abundance (% of the total number of specimens) of nematode species in Hállö site.

|    | Classification and identity      | Flotation with MgCl <sub>2</sub> | Flotation with H <sub>2</sub> O |
|----|----------------------------------|----------------------------------|---------------------------------|
|    | <b>ORDER ENOPLIDA</b>            |                                  |                                 |
|    | <b>Family Enoplidae</b>          |                                  |                                 |
| 1  | <i>Enoplus</i> sp.               | 0.46                             | 0.43                            |
|    | <b>Family Thoracostomopsidae</b> |                                  |                                 |
| 2  | Enoplolaiminae gen. sp. 1        | 0.33                             | 0.29                            |
| 3  | Enoplolaiminae gen. sp. 2        | 0.30                             | 0.25                            |
|    | <b>Family Phanodermatidae</b>    |                                  |                                 |
| 4  | Phanodermatidae gen. sp.         | –                                | 0.03                            |
|    | <b>Family Anticomidae</b>        |                                  |                                 |
| 5  | <i>Anticoma</i> sp.              | 1.07                             | 0.66                            |
|    | <b>Family Oncholaimidae</b>      |                                  |                                 |
| 6  | <i>Viscosia</i> sp.              | 3.73                             | 1.96                            |
| 7  | <i>Pontonema</i> sp.             | 0.15                             | 0.03                            |
| 8  | Oncholaimidae gen. sp.           | 0.41                             | 0.31                            |
|    | <b>Family Enchelidiidae</b>      |                                  |                                 |
| 9  | <i>Symplocostoma</i> sp.         | 0.78                             | 0.22                            |
| 10 | <i>Pareurystomina</i> sp.        | 0.08                             | 0.03                            |
|    | <b>Family Leptosomatidae</b>     |                                  |                                 |
| 11 | Leptosomatidae gen. sp.          | –                                | 0.01                            |
|    | <b>Family Oxystominidae</b>      |                                  |                                 |
| 12 | <i>Nemanema</i> sp.              | –                                | 0.04                            |
| 13 | <i>Oxystomina</i> sp.            | 0.04                             | 0.08                            |
| 14 | <i>Thalassoalaimus</i> sp.       | 0.08                             | 0.16                            |
| 15 | <i>Halalaimus</i> sp. 1          | 0.23                             | 0.66                            |
| 16 | <i>Halalaimus</i> sp. 2          | –                                | 0.01                            |
| 17 | <i>Maldivea</i> sp.              | 0.08                             | –                               |
|    | <b>Family Tripyloididae</b>      |                                  |                                 |
| 18 | <i>Bathylaimus</i> sp.           | –                                | 0.01                            |
|    | <b>Family Xennellidae</b>        |                                  |                                 |
| 19 | <i>Xennella</i> sp.              | 0.28                             | 0.05                            |
|    | <b>ORDER TRIPLONCHIDA</b>        |                                  |                                 |
|    | <b>Family Rhabdodemaniidae</b>   |                                  |                                 |
| 20 | <i>Rhabdodemia</i> sp.           | 2.36                             | 0.83                            |

|    | Classification and identity                   | Flotation with MgCl <sub>2</sub> | Flotation with H <sub>2</sub> O |
|----|-----------------------------------------------|----------------------------------|---------------------------------|
|    | <b>ORDER DESMOSCOLECIDA</b>                   |                                  |                                 |
|    | <b>Family Desmoscolecidae</b>                 |                                  |                                 |
| 21 | <i>Desmoscolex</i> spp.                       | 0.32                             | 0.46                            |
| 22 | <i>Tricoma (Tricoma)</i> spp.                 | 0.25                             | 0.39                            |
| 23 | <i>Tricoma (Quadricoma)</i> spp.              | 3.05                             | 3.49                            |
|    | <b>Family Meyliidae</b>                       |                                  |                                 |
| 24 | <i>Gerlachius</i> sp.                         | –                                | 0.01                            |
| 25 | <i>Meylia</i> sp.                             | –                                | 0.01                            |
|    | <b>ORDER CHROMADORIDA</b>                     |                                  |                                 |
|    | <b>Family Chromadoridae</b>                   |                                  |                                 |
| 26 | <i>Chromadora</i> sp.                         | 0.04                             | 0.07                            |
| 27 | <i>Chromadorita</i> sp.                       | 1.53                             | 1.39                            |
| 28 | <i>Chromadorella</i> cf. <i>filiformis</i>    | 0.68                             | 0.46                            |
| 29 | <i>Neochromadora</i> sp. 1                    | 2.33                             | 1.81                            |
| 30 | <i>Neochromadora</i> sp. 2                    | 0.24                             | 0.04                            |
| 31 | <i>Neochromadora</i> sp. 3                    | 0.16                             | 0.10                            |
| 32 | <i>Dichromadora</i> sp. 1                     | 0.33                             | 0.87                            |
| 33 | <i>Dichromadora</i> sp. 2                     | 0.04                             | –                               |
| 34 | <i>Euchromadora</i> sp.                       | 1.03                             | 0.36                            |
| 35 | <i>Innocuanema tentabundum</i>                | 1.19                             | 1.30                            |
| 36 | <i>Ptycholaimellus</i> sp.                    | 0.40                             | 0.31                            |
| 37 | <i>Spilophorella</i> sp.                      | 0.17                             | 0.25                            |
| 38 | <i>Actinonema</i> sp.                         | 0.45                             | 0.14                            |
| 39 | Chromadoridae gen. spp.                       | 0.28                             | 0.16                            |
|    | <b>Family Cyatholaimidae</b>                  |                                  |                                 |
| 40 | <i>Pomponema</i> sp.                          | 0.16                             | 0.05                            |
| 41 | <i>Paracanthonchus</i> sp. 1                  | 0.80                             | 0.23                            |
| 42 | <i>Paracanthonchus</i> cf. <i>spectabilis</i> | 0.04                             | 0.16                            |
| 43 | <i>Paracanthonchus</i> cf. <i>longus</i>      | 1.89                             | 2.26                            |
| 44 | <i>Preacanthonchus</i> cf. <i>inglisi</i>     | 0.80                             | 0.55                            |
| 45 | <i>Paracyatholaimoides</i> sp.                | 0.23                             | 1.98                            |
| 46 | <i>Marylinnia</i> sp.                         | 0.04                             | 0.16                            |
| 47 | <i>Longicyatholaimus</i> sp.                  | –                                | 0.14                            |
| 48 | Cyatholaimidae gen. sp.                       | 0.17                             | 0.04                            |
|    | <b>Family Selachinematidae</b>                |                                  |                                 |
| 49 | <i>Halichoanolaimus</i> sp.                   | 1.92                             | 1.17                            |
| 50 | <i>Latronema</i> sp.                          | 0.12                             | 0.09                            |
| 51 | <i>Gammanema</i> sp.                          | 0.21                             | 0.13                            |
| 52 | <i>Choniolaimus</i> sp.                       | 0.04                             | 0.01                            |
|    | <b>ORDER DESMODORIDA</b>                      |                                  |                                 |
|    | <b>Family Desmodoridae</b>                    |                                  |                                 |

|    | Classification and identity         | Flotation with MgCl <sub>2</sub> | Flotation with H <sub>2</sub> O |
|----|-------------------------------------|----------------------------------|---------------------------------|
| 53 | <i>Desmodora cf. communis</i>       | 1.14                             | 0.59                            |
| 54 | <i>Desmodora pontica</i>            | 15.53                            | 14.26                           |
| 55 | <i>Desmodora granulata</i>          | –                                | 0.01                            |
| 56 | <i>Desmodorella schulzi</i>         | 10.49                            | 10.22                           |
| 57 | <i>Bradylaimus pellita</i>          | 2.74                             | 2.09                            |
| 58 | <i>Bolbonema brevicolle</i>         | 0.28                             | 0.38                            |
| 59 | <i>Chromaspirina parapontica</i>    | 10.42                            | 20.34                           |
| 60 | <i>Spirinia</i> sp. 1               | 0.35                             | 0.27                            |
| 61 | <i>Spirinia</i> sp. 2               | 0.27                             | 0.27                            |
| 62 | <i>Leptonemella</i> sp.             | 0.04                             | 0.03                            |
| 63 | <i>Adelphos</i> sp.                 | 0.04                             | 0.01                            |
|    | <b>Family Epsilonematidae</b>       |                                  |                                 |
| 64 | <i>Epsilonema/Metepsilonema</i> sp. | 0.11                             | 0.35                            |
| 65 | <i>Perepsilonema</i> sp.            | 1.08                             | 4.97                            |
|    | <b>Family Draconematidae</b>        |                                  |                                 |
| 66 | <i>Draconema cephalatum</i>         | –                                | 0.01                            |
|    | <b>Family Microlaimidae</b>         |                                  |                                 |
| 67 | <i>Ixonema powelli</i>              | 0.21                             | 0.95                            |
| 68 | <i>Microlaimus</i> sp. 1            | 8.24                             | 5.81                            |
| 69 | <i>Microlaimus</i> sp. 2            | 1.97                             | 2.03                            |
| 70 | <i>Microlaimus</i> sp. 3            | 1.42                             | 2.00                            |
| 71 | <i>Microlaimus</i> sp. 4            | 0.04                             | –                               |
| 72 | <i>Microlaimus</i> sp. 5            | –                                | 0.04                            |
| 73 | <i>Microlaimus acanthus</i>         | –                                | 0.01                            |
| 74 | <i>Pseudoncholaimus dentatus</i>    | 0.13                             | 0.08                            |
|    | <b>Family Monoposthiidae</b>        |                                  |                                 |
| 75 | <i>Monoposthia costata</i>          | 0.31                             | 0.23                            |
|    | <b>ORDER MONHYSTERIDA</b>           |                                  |                                 |
|    | <b>Family Xyalidae</b>              |                                  |                                 |
| 76 | <i>Daptonema</i> sp. 1              | 1.45                             | 0.83                            |
| 77 | <i>Daptonema</i> sp. 2              | –                                | 0.03                            |
| 78 | <i>Theristus</i> sp. 1              | 1.39                             | 1.43                            |
| 79 | <i>Theristus</i> sp. 2              | 0.04                             | 0.03                            |
| 80 | <i>Gonionchus</i> sp.               | 0.11                             | 0.07                            |
| 81 | <i>Echinotheristus</i> sp.          | 0.20                             | 0.14                            |
| 82 | <i>Amphimonhystera</i> sp.          | 0.04                             | 0.09                            |
| 83 | <i>Sphaerotheristus</i> sp.         | –                                | 0.01                            |
| 84 | Xyalidae gen. sp.                   | 0.04                             | 0.07                            |
|    | <b>Family Monhysteridae</b>         |                                  |                                 |
| 85 | Monhysteridae gen. sp.              | 0.04                             | 0.01                            |
|    | <b>Family Siphonolaimidae</b>       |                                  |                                 |

|     | Classification and identity      | Flotation with MgCl <sub>2</sub> | Flotation with H <sub>2</sub> O |
|-----|----------------------------------|----------------------------------|---------------------------------|
| 86  | <i>Siphonolaimus</i> sp.         | 0.12                             | 0.17                            |
|     | <b>Family Linhomoeidae</b>       |                                  |                                 |
| 87  | <i>Disconema suecicum</i>        | 0.12                             | 0.07                            |
| 88  | Linchomoeidae gen. spp.          | 0.37                             | 0.20                            |
|     | <b>ORDER ARAEOLAIMIDA</b>        |                                  |                                 |
|     | <b>Family Comesomatidae</b>      |                                  |                                 |
| 89  | <i>Sabatieria</i> sp.            | 9.21                             | 3.56                            |
| 90  | <i>Paramesonchium</i> sp. n.     | 0.12                             | –                               |
|     | <b>Family Axonolaimidae</b>      |                                  |                                 |
| 91  | <i>Axonolaimus helgolandicus</i> | 0.27                             | 0.10                            |
| 92  | <i>Ascolaimus elongatus</i>      | 0.04                             | –                               |
| 93  | <i>Odontophora villoti</i>       | 1.35                             | 2.85                            |
|     | <b>Family Diplopeltidae</b>      |                                  |                                 |
| 94  | <i>Southerniella</i> sp.         | 0.08                             | 0.07                            |
| 95  | <i>Diplopeltula</i> sp.          | 0.12                             | 0.05                            |
|     | <b>ORDER PLECTIDA</b>            |                                  |                                 |
|     | <b>Family Leptolaimidae</b>      |                                  |                                 |
| 96  | <i>Leptolaimus pellucidus</i>    | 0.08                             | 0.05                            |
| 97  | <i>Leptolaimus</i> sp.           | 0.04                             | 0.03                            |
| 98  | <i>Leptolaimus</i> sp. n.        | 0.40                             | 0.23                            |
| 99  | <i>Manunema</i> sp.              | 0.04                             | 0.01                            |
|     | <b>Family Camacolaimidae</b>     |                                  |                                 |
| 100 | <i>Stephanolaimus elegans</i>    | 0.12                             | 0.03                            |
| 101 | <i>Dagda bipapillata</i>         | –                                | 0.01                            |
| 102 | <i>Deontolaimus</i> sp.          | 0.04                             | 0.04                            |
| 103 | <i>Onchium</i> sp.               | –                                | 0.01                            |
|     | <b>Family Diplopeltoididae</b>   |                                  |                                 |
| 104 | <i>Diplopeltoides</i> sp. n. 1   | 0.04                             | –                               |
| 105 | <i>Diplopeltoides</i> sp. n. 2   | –                                | 0.01                            |
|     | <b>Family Tarvaiidae</b>         |                                  |                                 |
| 106 | <i>Tarvaia</i> sp.               | –                                | 0.03                            |
|     | <b>Family Tubolaimoididae</b>    |                                  |                                 |
| 107 | <i>Tubolaimoides</i> sp.         | –                                | 0.01                            |
|     |                                  |                                  |                                 |
| 108 | Nematoda indet.                  | 0.04                             | 0.14                            |
