# Supplementary material for: Taxonomy assignment approach determines the efficiency of identification of OTUs in marine nematodes
Source: PubMed Central journal article supplement (PMC5579096; doi:10.1098/rsos.170315), 2017-08-16
Supplement: rsos170315supp6.pdf [file rsos170315supp6.pdf]

**Supplementary file for the article:**

Holovachov O, Haenel Q, Bourlat SJ, Jondelius U. Taxonomy assignment approach determines the efficiency of identification of OTUs in marine nematodes. *Royal Society Open Science*.

**Supplementary Table 3.** Taxonomic composition and relative abundance (% of the total number of specimens) of nematode species in Telekabeln site.

|    | Classification and identity      | Siphoning | Flotation with H <sub>2</sub> O |
|----|----------------------------------|-----------|---------------------------------|
|    | <b>ORDER ENOPLIDA</b>            |           |                                 |
|    | <b>Family Thoracostomopsidae</b> |           |                                 |
| 1  | Enoplolaiminae gen. sp.          | 3.45      | 0.08                            |
|    | <b>Family Anticomidae</b>        |           |                                 |
| 2  | <i>Anticoma</i> sp.              | 0.29      | 0.04                            |
|    | <b>Family Oncholaimidae</b>      |           |                                 |
| 3  | <i>Viscosia</i> sp. 1            | 3.16      | 0.97                            |
| 4  | <i>Viscosia</i> sp. 2            | 6.66      | 0.93                            |
| 5  | <i>Viscosia</i> sp. 3            | 0.19      | 0.04                            |
| 6  | Oncholaimidae gen. sp.           | 0.05      | –                               |
|    | <b>Family Enchelidiidae</b>      |           |                                 |
| 7  | <i>Symplocostoma</i> sp.         | 0.10      | 0.04                            |
| 8  | <i>Polygastrophora</i> sp.       | 1.05      | 0.04                            |
|    | <b>Family Ironidae</b>           |           |                                 |
| 9  | <i>Thalassironus</i> sp.         | 0.34      | 0.43                            |
|    | <b>Family Oxystominidae</b>      |           |                                 |
| 10 | <i>Oxystomina</i> sp. 1          | 0.24      | 0.23                            |
| 11 | <i>Oxystomina</i> sp. 2          | 1.34      | 0.12                            |
| 12 | <i>Oxystomina</i> sp. 3          | 0.05      | 0.04                            |
| 13 | <i>Lithinium</i> sp.             | 0.05      | –                               |
| 14 | <i>Thalassoalaimus</i> sp. 1     | 0.19      | 0.66                            |
| 15 | <i>Thalassoalaimus</i> sp. 2     | 0.05      | 0.16                            |
| 16 | <i>Thalassoalaimus</i> sp. 3     | –         | 0.04                            |
| 17 | <i>Halalaimus</i> sp. 1          | 2.59      | 1.48                            |
| 18 | <i>Halalaimus</i> sp. 2          | 1.15      | 0.74                            |
| 19 | <i>Halalaimus</i> sp. 3          | 0.43      | 0.97                            |
| 20 | <i>Halalaimus</i> sp. 4          | 1.49      | 1.13                            |
| 21 | <i>Halalaimus</i> sp. 5          | 0.10      | 0.16                            |
| 22 | <i>Halalaimus</i> sp. 6          | 0.10      | –                               |
| 23 | <i>Halalaimus</i> sp. 7          | –         | 0.08                            |
| 24 | <i>Halalaimus</i> sp. 8          | 0.86      | 1.13                            |
| 25 | <i>Wieseria</i> sp.              | 0.29      | 2.95                            |
| 26 | Oxystominidae gen. sp.           | 0.81      | 0.93                            |

|    | Classification and identity                     | Siphoning | Flotation with H <sub>2</sub> O |
|----|-------------------------------------------------|-----------|---------------------------------|
|    | <b>Family Tripyloididae</b>                     |           |                                 |
| 27 | <i>Tripyloides</i> sp.                          | 0.43      | 0.04                            |
| 28 | <i>Bathylaimus</i> sp.                          | 1.49      | 0.23                            |
|    | <b>Family Trefusiidae</b>                       |           |                                 |
| 29 | <i>Trefusia</i> sp.                             | –         | 1.44                            |
|    | <b>ORDER TRIPLONCHIDA</b>                       |           |                                 |
|    | <b>Family Pandolaimidae</b>                     |           |                                 |
| 30 | <i>Pandolaimus</i> sp.                          | 0.48      | 1.63                            |
|    | <b>Family Rhabdodemaniidae</b>                  |           |                                 |
| 31 | <i>Rhabdodemia</i> sp.                          | 0.72      | 0.19                            |
|    | <b>ORDER DESMOSCOLECIDA</b>                     |           |                                 |
|    | <b>Family Desmoscolecidae</b>                   |           |                                 |
| 32 | <i>Desmoscolex</i> sp.                          | 0.67      | 1.71                            |
| 33 | <i>Tricoma (Quadricoma)</i> sp. 1               | 2.83      | 16.11                           |
| 34 | <i>Tricoma (Quadricoma)</i> sp. 2               | 5.56      | 1.28                            |
| 35 | <i>Tricoma (Quadricoma)</i> sp. 3               | 0.19      | 0.39                            |
|    | <b>Family Cyartonematidae</b>                   |           |                                 |
| 36 | <i>Cyartonema</i> sp.                           | –         | 1.05                            |
|    | <b>ORDER CHROMADORIDA</b>                       |           |                                 |
|    | <b>Family Chromadoridae</b>                     |           |                                 |
| 37 | <i>Chromadorita</i> sp. 1                       | 0.58      | 0.47                            |
| 38 | <i>Chromadorita</i> sp. 2                       | 0.14      | –                               |
| 39 | <i>Neochromadora</i> sp. 1                      | 0.05      | –                               |
| 40 | <i>Neochromadora</i> sp. 2                      | 0.38      | 0.04                            |
| 41 | <i>Actinonema</i> sp.                           | 2.25      | 0.74                            |
| 42 | <i>Trochamus</i> sp.                            | 1.49      | 0.78                            |
| 43 | <i>Chromadoridae</i> gen. spp.                  | 0.14      | 0.74                            |
| 44 | <i>Acantholaimus</i> sp.                        | –         | 0.08                            |
|    | <b>Family Cyatholaimidae</b>                    |           |                                 |
| 45 | <i>Paracanthonchus</i> cf. <i>longicaudatus</i> | 0.05      | 2.06                            |
| 46 | <i>Marylinnia</i> sp.                           | 6.28      | 6.29                            |
| 47 | <i>Paralongicyatholaimus</i> sp.                | 0.10      | 1.01                            |
| 48 | <i>Craspodema</i> sp.                           | 0.19      | –                               |
|    | <b>Family Selachinematidae</b>                  |           |                                 |
| 49 | <i>Halichoanolaimus</i> sp.                     | 0.10      | –                               |
| 50 | <i>Cheironchus</i> sp.                          | –         | 0.12                            |
| 51 | <i>Synonchiella</i> sp.                         | –         | 0.19                            |
| 52 | <i>Choniolaimus</i> sp. 1                       | 0.24      | 1.55                            |
| 53 | <i>Choniolaimus</i> sp. 2                       | –         | 0.04                            |
|    | <b>ORDER DESMODORIDA</b>                        |           |                                 |
|    | <b>Family Desmodoridae</b>                      |           |                                 |

|    | Classification and identity       | Siphoning | Flotation with H <sub>2</sub> O |
|----|-----------------------------------|-----------|---------------------------------|
| 54 | <i>Desmodora cf. communis</i>     | 0.05      | –                               |
| 55 | <i>Desmodora pontica</i>          | 0.62      | 0.19                            |
| 56 | <i>Desmodorella tenuispiculum</i> | 3.60      | 3.18                            |
| 57 | <i>Chromaspirina</i> sp.          | –         | 0.12                            |
| 58 | <i>Spirinia</i> sp.               | 0.10      | 0.39                            |
|    | <b>Family Microlaimidae</b>       |           |                                 |
| 59 | <i>Microlaimus</i> sp. 1          | 0.24      | 0.85                            |
| 60 | <i>Microlaimus</i> sp. 2          | –         | 2.02                            |
| 61 | <i>Microlaimus</i> sp. 3          | –         | 0.74                            |
| 62 | <i>Bolbolaimus</i> sp.            | –         | 0.04                            |
|    | <b>Family Monoposthiidae</b>      |           |                                 |
| 63 | Monoposthiidae gen. sp.           | 0.05      | –                               |
|    | <b>Family Richtersiidae</b>       |           |                                 |
| 64 | <i>Richtersia</i> sp.             | 2.01      | 5.90                            |
|    | <b>ORDER MONHYSTERIDA</b>         |           |                                 |
|    | <b>Family Xyalidae</b>            |           |                                 |
| 65 | <i>Daptonema</i> sp.              | 1.58      | 0.08                            |
| 66 | <i>Metadesmolaimus</i> sp.        | 3.07      | 4.62                            |
| 67 | <i>Gnomoxyala</i> sp.             | –         | 0.19                            |
| 68 | Xyalidae gen. sp.                 | 0.14      | 0.97                            |
|    | <b>Family Sphaerolaimidae</b>     |           |                                 |
| 69 | <i>Sphaerolaimus</i> sp. 1        | 1.77      | 1.82                            |
| 70 | <i>Sphaerolaimus</i> sp. 2        | 0.58      | 0.12                            |
| 71 | <i>Parasphaerolaimus</i> sp.      | 0.38      | 0.47                            |
|    | <b>Family Siphonolaimidae</b>     |           |                                 |
| 72 | <i>Siphonolaimus</i> sp.          | –         | 0.08                            |
|    | <b>Family Linhomoeidae</b>        |           |                                 |
| 73 | <i>Disconema</i> sp.              | 0.10      | –                               |
| 74 | <i>Eleutherolaimus</i> sp.        | 0.58      | 1.32                            |
| 75 | <i>Linchomoeidae</i> gen. sp.     | 2.11      | 0.16                            |
| 76 | <i>Monhysteroides</i> sp.         | –         | 0.97                            |
| 77 | <i>Terschellingia</i> sp. 1       | –         | 1.71                            |
| 78 | <i>Terschellingia</i> sp. 2       | 0.05      | 0.08                            |
|    | <b>ORDER ARAEOLAIMIDA</b>         |           |                                 |
|    | <b>Family Comesomatidae</b>       |           |                                 |
| 79 | <i>Sabatieria</i> spp.            | 18.31     | 8.46                            |
| 80 | <i>Setosabatieria</i> sp.         | 5.61      | 2.80                            |
| 81 | <i>Dorylaimopsis</i> sp.          | 0.86      | 3.69                            |
| 82 | <i>Laimella</i> sp.               | –         | 0.04                            |
|    | <b>Family Axonolaimidae</b>       |           |                                 |
| 83 | <i>Axonolaimus</i> sp.            | 5.42      | 0.85                            |

|     | Classification and identity           | Siphoning | Flotation with H <sub>2</sub> O |
|-----|---------------------------------------|-----------|---------------------------------|
| 84  | <i>Odontophora</i> sp.                | 0.05      | 0.08                            |
|     | <b>Family Diplopeltidae</b>           |           |                                 |
| 85  | <i>Araeolaimus spinosus</i>           | 0.96      | 0.08                            |
| 86  | <i>Campylaimus rimatus</i>            | 0.14      | 0.04                            |
| 87  | <i>Campylaimus amphidialis</i>        | –         | 0.31                            |
| 88  | <i>Campylaimus tkatchevi</i>          | 0.05      | 0.39                            |
| 89  | <i>Campylaimus orientalis</i>         | –         | 0.31                            |
| 90  | <i>Campylaimus</i> sp.                | 0.05      | 0.19                            |
| 91  | <i>Pararaeolaimus</i> sp.             | 0.19      | 0.04                            |
| 92  | <i>Diplopeltula</i> sp.               | 0.10      | 0.04                            |
|     | <b>ORDER PLECTIDA</b>                 |           |                                 |
|     | <b>Family Leptolaimidae</b>           |           |                                 |
| 93  | <i>Leptolaimus danicus</i>            | 0.05      | 0.43                            |
| 94  | <i>Leptolaimus septempapillatus</i>   | –         | 0.19                            |
| 95  | <i>Leptolaimus venustus</i>           | –         | 0.04                            |
| 96  | <i>Leptolaimus</i> sp.                | –         | 0.08                            |
| 97  | <i>Antomicron lorenzeni</i>           | –         | 0.08                            |
| 98  | <i>Antomicron quindecimpapillatus</i> | –         | 0.04                            |
| 99  | <i>Leptolaimoides</i> sp.             | 0.05      | –                               |
|     | <b>Family Camacolaimidae</b>          |           |                                 |
| 100 | <i>Alaimella</i> sp.                  | 0.34      | 0.19                            |
| 101 | Camacolaimidae gen. sp.               | 0.05      | 0.12                            |
| 102 | <i>Deontolaimus catalinae</i>         | –         | 0.04                            |
| 103 | <i>Deontolaimus</i> sp.               | –         | 0.08                            |
|     | <b>Family Rhadinematidae</b>          |           |                                 |
| 104 | <i>Rhadinema timmi</i>                | 0.05      | 0.04                            |
|     | <b>Family Ceramonematidae</b>         |           |                                 |
| 105 | <i>Pselionema</i> sp.                 | 0.62      | 0.82                            |
| 106 | <i>Dasynemoides</i> sp.               | –         | 0.04                            |
|     | <b>Family Diplopeltoididae</b>        |           |                                 |
| 107 | <i>Diplopeltoides ornatus</i>         | 0.05      | 0.04                            |
| 108 | <i>Diplopeltoides linkei</i>          | –         | 0.04                            |
| 109 | <i>Diplopeltoides nudus</i>           | –         | 0.08                            |
| 110 | <i>Diplopeltoides asetosus</i>        | –         | 0.04                            |
| 111 | <i>Diplopeltoides</i> sp. n.          | –         | 1.67                            |
|     | <b>Family Aegialoalaimidae</b>        |           |                                 |
| 112 | <i>Aegialoalaimus</i> sp.             | 0.29      | 0.16                            |
|     | <b>Family Paramicrolaimidae</b>       |           |                                 |
| 113 | <i>Paramicrolaimus</i> sp.            | –         | 0.04                            |
|     |                                       |           |                                 |
| 114 | Nematoda indet.                       | 0.38      | 0.89                            |
