# Supplementary material for: Taxonomy assignment approach determines the efficiency of identification of OTUs in marine nematodes
Source: PubMed Central journal article supplement (PMC5579096; doi:10.1098/rsos.170315), 2017-08-16
Supplement: rsos170315supp7.pdf [file rsos170315supp7.pdf]

**Supplementary file for the article:**

Holovachov O, Haenel Q, Bourlat SJ, Jondelius U. Taxonomy assignment approach determines the efficiency of identification of OTUs in marine nematodes. *Royal Society Open Science*.

**Supplementary Table 4.** Results of alignment-based taxonomy assignment using BLASTN 2.5.0+ against the nucleotide collection of the NCBI database.

| OTU ID        | Best hit                            | identity % | cover % | Family identification |
|---------------|-------------------------------------|------------|---------|-----------------------|
| HE1.SSU848264 | <i>Paracyatholaimus intermedius</i> | 92         | 100     | Cyatholaimidae        |
| HE1.SSU850987 | <i>Eubostrichus topiarius</i>       | 89         | 100     | unassigned            |
| HE1.SSU856624 | <i>Thalassoalaimus</i> sp.          | 94         | 88      | unassigned            |
| HE1.SSU856738 | <i>Calomicrolaimus parahonestus</i> | 92         | 100     | Microlaimidae         |
| HE1.SSU858060 | <i>Dichromadora</i> sp.             | 94         | 98      | unassigned            |
| HE1.SSU867071 | <i>Synonchiella</i> sp.             | 95         | 93      | unassigned            |
| HE2.SSU637072 | <i>Campydora</i> sp.                | 90         | 99      | unassigned            |
| HE2.SSU637135 | <i>Neochromadora</i> sp.            | 90         | 99      | unassigned            |
| HE2.SSU644966 | <i>Paracanthonchus</i> sp.          | 91         | 100     | Cyatholaimidae        |
| HE2.SSU654005 | <i>Rhabdodemia</i> sp.              | 93         | 84      | unassigned            |
| HE2.SSU655107 | <i>Theristus</i> sp.                | 88         | 99      | unassigned            |
| HE2.SSU659506 | <i>Neochromadora</i> sp.            | 97         | 100     | Chromadoridae         |
| HE3.SSU110275 | <i>Enoplus communis</i> sp.         | 98         | 100     | Enoplidae             |
| HE3.SSU117415 | <i>Paracyatholaimus</i> sp.         | 91         | 100     | Cyatholaimidae        |
| HE3.SSU118424 | <i>Oxystomina</i> sp.               | 89         | 98      | unassigned            |
| HE3.SSU124287 | <i>Enoploides brunettii</i>         | 98         | 100     | Thoracostomopsidae    |
| HE3.SSU124998 | <i>Astomonema</i> sp.               | 85         | 100     | unassigned            |
| HE4.SSU913283 | <i>Anaplectus</i> sp.               | 89         | 100     | unassigned            |
| HE5.SSU181724 | <i>Neochromadora</i> sp.            | 87         | 100     | unassigned            |
| HE5.SSU188855 | <i>Symplocostoma</i> sp.            | 99         | 98      | unassigned            |
| HE6.SSU355777 | <i>Achromadora terricola</i>        | 93         | 100     | Achromadoridae        |
| HE6.SSU358048 | <i>Neochromadora</i> sp.            | 92         | 100     | Chromadoridae         |
| HE6.SSU360897 | <i>Desmodora ovigera</i>            | 93         | 92      | unassigned            |
| HE6.SSU361449 | <i>Syringolaimus</i> sp.            | 94         | 100     | Ironidae              |
| HE6.SSU365256 | <i>Desmodora ovigera</i>            | 97         | 76      | unassigned            |
| HE6.SSU368318 | <i>Prochaetosoma</i> sp.            | 93         | 92      | unassigned            |
| HE6.SSU370544 | <i>Daptonema normandicum</i>        | 97         | 99      | unassigned            |
| HE6.SSU378839 | <i>Calomicrolaimus parahonestus</i> | 82         | 99      | unassigned            |
| HE6.SSU383414 | <i>Sabatieria</i> sp.               | 94         | 100     | Comesomatidae         |
| HE6.SSU383888 | <i>Neochromadora</i> sp.            | 90         | 100     | Chromadoridae         |
| HE7.SSU232624 | <i>Leptolaimus</i> sp.              | 91         | 98      | unassigned            |
| HE7.SSU256492 | <i>Neochromadora</i> sp.            | 95         | 100     | Chromadoridae         |
| HE8.SSU829972 | <i>Anticoma</i> sp.                 | 98         | 88      | unassigned            |

| OTU ID        | Best hit                                       | identity % | cover % | Family identification |
|---------------|------------------------------------------------|------------|---------|-----------------------|
| HE8.SSU843570 | <i>Neochromadora</i> sp.                       | 91         | 100     | Chromadoridae         |
| HE9.SSU305678 | <i>Theristus</i> sp.                           | 88         | 100     | unassigned            |
| HF1.SSU759758 | <i>Camacolaimus</i> sp.                        | 98         | 98      | unassigned            |
| HF1.SSU763392 | <i>Praeacanthonchus punctatus</i>              | 94         | 100     | Cyatholaimidae        |
| HF1.SSU764346 | <i>Paracanthonchus</i> sp.                     | 93         | 100     | Cyatholaimidae        |
| HF1.SSU774294 | <i>Mermis nigrescens</i>                       | 95         | 100     | Mermithidae           |
| HF1.SSU779114 | <i>Odontophora rectangula</i>                  | 99         | 98      | unassigned            |
| HF1.SSU780927 | <i>Desmolaimus</i> sp.                         | 95         | 76      | unassigned            |
| HF2.SSU192072 | <i>Chromadorina</i> sp.                        | 100        | 98      | unassigned            |
| HF2.SSU204352 | <i>Anaplectus</i> sp.                          | 87         | 100     | unassigned            |
| HF2.SSU205129 | <i>Neochromadora</i>                           | 89         | 100     | unassigned            |
| HF2.SSU208147 | <i>Synonchiella</i> or <i>Halichoanolaimus</i> | 98         | 98      | unassigned            |
| HF2.SSU210357 | <i>Calytronema</i> sp.                         | 92         | 100     | Enchelidiidae         |
| HF3.SSU989895 | <i>Setostephanolaimus</i> sp.                  | 92         | 98      | unassigned            |
| HF3.SSU990962 | <i>Neochromadora</i> sp.                       | 90         | 100     | Chromadoridae         |
| HF4.SSU606153 | <i>Neochromadora</i> sp.                       | 99         | 100     | Chromadoridae         |
| HF4.SSU614317 | <i>Sabatieria</i> sp.                          | 92         | 100     | Comesomatidae         |
| HF4.SSU619471 | <i>Molgolaimus demani</i>                      | 90         | 100     | Microlaimidae         |
| HF4.SSU620879 | <i>Punctodora ratzeburgensis</i>               | 92         | 100     | Chromadoridae         |
| HF4.SSU622464 | <i>Plectus aquatilis</i>                       | 95         | 100     | Plectidae             |
| HF4.SSU624085 | <i>Prochaetosoma</i> sp.                       | 90         | 93      | unassigned            |
| HF4.SSU625424 | <i>Sabatieria</i> sp.                          | 87         | 100     | unassigned            |
| HF4.SSU628562 | <i>Stilbonema majum</i>                        | 82         | 100     | unassigned            |
| HF4.SSU631524 | <i>Leptolaimus</i> sp.                         | 97         | 92      | unassigned            |
| HF4.SSU632264 | <i>Diplopeltula</i> sp.                        | 95         | 98      | unassigned            |
| HF4.SSU635045 | <i>Chromadorina</i> sp.                        | 96         | 98      | unassigned            |
| HF5.SSU991188 | <i>Oncholaimidae</i> indet.                    | 93         | 88      | unassigned            |
| HF5.SSU995414 | <i>Rhabdolaimus aquaticus</i>                  | 90         | 100     | Rhabdolaimidae        |
| HF6.SSU329881 | <i>Desmodora ovigera</i>                       | 99         | 93      | unassigned            |
| HF6.SSU338435 | <i>Neochromadora</i> sp.                       | 89         | 91      | unassigned            |
| HF6.SSU338739 | <i>Astomonema</i> sp.                          | 89         | 100     | unassigned            |
| HF7.SSU385021 | <i>Neochromadora</i> sp.                       | 90         | 100     | Chromadoridae         |
| HF7.SSU390110 | <i>Desmolaimus</i> sp.                         | 97         | 98      | unassigned            |
| HF7.SSU398053 | <i>Camacolaimus</i> sp.                        | 94         | 77      | unassigned            |
| HF7.SSU407024 | <i>Achromadora ruricola</i>                    | 95         | 95      | unassigned            |
| HF7.SSU407761 | <i>Desmolaimus</i> sp.                         | 94         | 98      | unassigned            |
| HF7.SSU409331 | <i>Pomponema</i> sp.                           | 94         | 76      | unassigned            |
| HF8.SSU795426 | <i>Cyatholaimus</i> sp.                        | 90         | 100     | Cyatholaimidae        |
| HF9.SSU14048  | <i>Calomicrolaimus</i> sp.                     | 93         | 76      | unassigned            |
| HF9.SSU14296  | <i>Pomponema</i> sp.                           | 85         | 90      | unassigned            |
| HF9.SSU17250  | <i>Enoploides brunettii</i>                    | 91         | 100     | Thoracostomopsidae    |

| OTU ID        | Best hit                                       | identity % | cover % | Family identification |
|---------------|------------------------------------------------|------------|---------|-----------------------|
| HF9.SSU17844  | <i>Pomponema</i> sp.                           | 94         | 89      | unassigned            |
| HF9.SSU18227  | <i>Neochromadora</i> sp.                       | 91         | 100     | Chromadoridae         |
| HF9.SSU19963  | <i>Desmoscolex</i> sp.                         | 87         | 100     | unassigned            |
| HF9.SSU20251  | <i>Calomicrolaimus parahonestus</i>            | 98         | 100     | Microlaimidae         |
| HF9.SSU22538  | <i>Mermis nigrescens</i>                       | 90         | 100     | Mermithidae           |
| TF1.SSU676746 | <i>Haliplectus</i> or <i>Prodesmodora</i>      | 90         | 100     | unassigned            |
| TF1.SSU677162 | <i>Anaplectus</i> sp.                          | 89         | 100     | unassigned            |
| TF1.SSU681557 | <i>Pseudocella</i> sp.                         | 87         | 100     | unassigned            |
| TF1.SSU688192 | <i>Terschellingia longicaudata</i>             | 90         | 100     | Linhomoeidae          |
| TF1.SSU692690 | <i>Synonchiella</i> or <i>Halichoanolaimus</i> | 91         | 100     | Selachinematidae      |
| TF1.SSU694267 | <i>Desmoscolex</i> sp.                         | 89         | 98      | unassigned            |
| TF1.SSU694751 | <i>Neochromadora</i> sp.                       | 90         | 100     | Chromadoridae         |
| TF1.SSU698227 | <i>Teratocephalus lirellus</i>                 | 91         | 100     | Teratocephalidae      |
| TF1.SSU700188 | <i>Terschellingia longicaudata</i>             | 96         | 100     | Linhomoeidae          |
| TF1.SSU703579 | <i>Astomonema</i> sp.                          | 90         | 100     | Siphonolaimidae       |
| TF1.SSU710679 | <i>Cyatholaimus</i> sp.                        | 99         | 100     | Cyatholaimidae        |
| TF1.SSU734804 | <i>Astomonema</i> sp.                          | 90         | 100     | Siphonolaimidae       |
| TF3.SSU956521 | <i>Sabatieria</i> sp.                          | 90         | 100     | Comesomatidae         |
| TF3.SSU960449 | <i>Desmoscolex</i> sp.                         | 88         | 98      | unassigned            |
| TF3.SSU966338 | <i>Theristus</i> sp.                           | 91         | 99      | unassigned            |
| TF4.SSU144249 | <i>Paracanthonchus</i> sp.                     | 97         | 99      | unassigned            |
| TF4.SSU150234 | <i>Metachromadora</i> sp.                      | 91         | 100     | Desmodoridae          |
| TF5.SSU410031 | <i>Praeacanthonchus</i> sp.                    | 88         | 100     | unassigned            |
| TF5.SSU419519 | <i>Desmoscolex</i> sp.                         | 92         | 98      | unassigned            |
| TF5.SSU430294 | <i>Theristus</i> sp.                           | 97         | 99      | unassigned            |
| TF5.SSU437076 | <i>Setosabatieria hilarula</i>                 | 92         | 100     | Comesomatidae         |
| TF5.SSU444034 | <i>Tripylella</i> sp.                          | 93         | 98      | unassigned            |
| TF5.SSU446087 | <i>Tarvaia</i> sp.                             | 91         | 97      | unassigned            |
| TF5.SSU453472 | <i>Tripylina</i> sp.                           | 89         | 100     | unassigned            |
| TF5.SSU457543 | <i>Oxystomina</i> sp.                          | 92         | 98      | unassigned            |
| TF5.SSU459305 | <i>Viscosia viscosa</i>                        | 92         | 100     | Oncholaimidae         |
| TF5.SSU466315 | <i>Daptonema</i> sp.                           | 96         | 99      | unassigned            |
| TF6.SSU33463  | <i>Oxystomina</i> sp.                          | 96         | 98      | unassigned            |
| TF6.SSU33935  | <i>Desmolaimus</i> sp.                         | 93         | 98      | unassigned            |
| TF6.SSU36442  | <i>Desmoscolex</i> sp.                         | 89         | 98      | unassigned            |
| TF6.SSU37421  | <i>Prochaetosoma</i> sp.                       | 93         | 92      | unassigned            |
| TF6.SSU41803  | <i>Daptonema</i> sp.                           | 88         | 98      | unassigned            |
| TF6.SSU47996  | <i>Viscosia</i> sp.                            | 92         | 100     | Oncholaimidae         |
| TF6.SSU48167  | <i>Sabatieria</i> sp.                          | 99         | 100     | Comesomatidae         |
| TF6.SSU53456  | <i>Viscosia</i> sp.                            | 99         | 98      | unassigned            |
| TF6.SSU54250  | <i>Calomicrolaimus parahonestus</i>            | 93         | 100     | Microlaimidae         |

| OTU ID        | Best hit                             | identity % | cover % | Family identification |
|---------------|--------------------------------------|------------|---------|-----------------------|
| TF6.SSU58877  | <i>Tarvaia</i> or <i>Desmoscolex</i> | 91         | 97      | unassigned            |
| TF6.SSU74955  | <i>Paracanthonchus</i> sp.           | 93         | 100     | Cyatholaimidae        |
| TF6.SSU82210  | <i>Stilbonema</i> sp.                | 85         | 100     | unassigned            |
| TF6.SSU84268  | <i>Spectatus spectatus</i>           | 82         | 90      | unassigned            |
| TF6.SSU98667  | <i>Campydora</i> sp.                 | 86         | 92      | unassigned            |
| TS1.SSU270885 | <i>Tarvaia</i> sp.                   | 88         | 97      | unassigned            |
| TS1.SSU284163 | <i>Desmoscolex</i> sp.               | 87         | 98      | unassigned            |
| TS2.SSU821962 | <i>Bathylaimus</i> sp.               | 91         | 100     | Tripyloididae         |
| TS2.SSU823349 | <i>Bathylaimus</i> sp.               | 90         | 88      | unassigned            |
| TS3.SSU475561 | <i>Astomonema</i> sp.                | 91         | 100     | Siphonolaimidae       |
| TS3.SSU489684 | <i>Desmoscolex</i> sp.               | 95         | 97      | unassigned            |
| TS3.SSU503133 | <i>Tripyloides</i> sp.               | 94         | 100     | Tripyloididae         |
| TS3.SSU508400 | <i>Desmolaimus</i> sp.               | 90         | 87      | unassigned            |
| TS4.SSU543236 | <i>Thalassoalaimus</i> sp.           | 90         | 88      | unassigned            |
| TS4.SSU544032 | <i>Desmoscolex</i> sp.               | 92         | 98      | unassigned            |
| TS5.SSU874117 | <i>Halalaimus</i> sp.                | 91         | 98      | unassigned            |
| TS5.SSU875407 | <i>Sabatieria celtica</i>            | 93         | 100     | Comesomatidae         |
| TS5.SSU881546 | <i>Theristus</i> sp.                 | 90         | 99      | unassigned            |
| TS5.SSU900338 | <i>Leptolaimus</i> sp.               | 94         | 98      | unassigned            |
| TS5.SSU901243 | <i>Dolicholaimus</i> sp.             | 96         | 88      | unassigned            |
| TS6.SSU559765 | <i>Tripyloides</i> sp.               | 95         | 89      | unassigned            |
| TS6.SSU570763 | <i>Axonolaimus</i> sp.               | 88         | 98      | unassigned            |
| TS6.SSU587229 | <i>Viscosia viscosa</i>              | 99         | 100     | Oncholaimidae         |
| HE6.SSU372021 | <i>Eumonhystera filiformis</i>       | 91         | 99      | unassigned            |
