# Supplementary material for: Taxonomy assignment approach determines the efficiency of identification of OTUs in marine nematodes
Source: PubMed Central journal article supplement (PMC5579096; doi:10.1098/rsos.170315), 2017-08-16
Supplement: rsos170315supp8.pdf [file rsos170315supp8.pdf]

**Supplementary file for the article:**

Holovachov O, Haenel Q, Bourlat SJ, Jondelius U. Taxonomy assignment approach determines the efficiency of identification of OTUs in marine nematodes. *Royal Society Open Science*.

**Supplementary Table 5.** Results of alignment-based taxonomy assignment using LCAClassifier of CREST against built-in reference database.

| OTU ID        | Best hit                                                      | Family identification |
|---------------|---------------------------------------------------------------|-----------------------|
| HE1.SSU848264 | Chromadorea; Chromadorida                                     | unassigned            |
| HE1.SSU850987 | Chromadorea                                                   | unassigned            |
| HE1.SSU856624 | Enoplea; Enoplida; Oxystominoidea                             | unassigned            |
| HE1.SSU856738 | Chromadorea; Desmodorida; Richtersioidea; Microlaimidae       | Microlaimidae         |
| HE1.SSU858060 | Chromadorea; Chromadorida                                     | unassigned            |
| HE1.SSU867071 | Chromadorea                                                   | unassigned            |
| HE2.SSU637072 | Enoplea; Enoplida; Enoploidea                                 | unassigned            |
| HE2.SSU637135 | Chromadorea; Chromadorida; Chromadoridae                      | Chromadoridae         |
| HE2.SSU644966 | Chromadorea; Chromadorida                                     | unassigned            |
| HE2.SSU654005 | Enoplea                                                       | unassigned            |
| HE2.SSU655107 | Chromadorea; Unknown Chromadorea                              | unassigned            |
| HE2.SSU659506 | Chromadorea; Chromadorida                                     | unassigned            |
| HE3.SSU110275 | Enoplea; Enoplida; Enoploidea; Enoplidae; Enoplus             | Enoplidae             |
| HE3.SSU117415 | Chromadorea; Chromadorida                                     | unassigned            |
| HE3.SSU118424 | Arthropoda; Crustacea; Maxillopoda; Copepoda                  | unassigned            |
| HE3.SSU124287 | Enoplea; Enoplida; Enoploidea; Thoracostomopsidae; Enoploides | Thoracostomopsidae    |
| HE3.SSU124998 | Chromadorea                                                   | unassigned            |
| HE4.SSU913283 | Chromadorea                                                   | unassigned            |
| HE5.SSU181724 | Chromadorea; Chromadorida                                     | unassigned            |
| HE5.SSU188855 | Enoplea; Enoplida; Oncholaimoidea                             | unassigned            |
| HE6.SSU355777 | Chromadorea; Chromadorida                                     | unassigned            |
| HE6.SSU358048 | Chromadorea; Chromadorida                                     | unassigned            |
| HE6.SSU360897 | Chromadorea; Desmodorida                                      | unassigned            |
| HE6.SSU361449 | Enoplea; Enoplida; Ironoidea                                  | unassigned            |
| HE6.SSU365256 | Chromadorea; Desmodorida                                      | unassigned            |
| HE6.SSU368318 | Chromadorea; Desmodorida; Desmodoridae                        | Desmodoridae          |
| HE6.SSU370544 | Chromadorea; Monhysterida; Xyalidae; Daptonema                | Xyalidae              |
| HE6.SSU378839 | Chromadorea                                                   | unassigned            |
| HE6.SSU383414 | Chromadorea; Monhysterida                                     | unassigned            |
| HE6.SSU383888 | Chromadorea                                                   | unassigned            |
| HE7.SSU232624 | Chromadorea; Araeolaimida; Leptolaimoidea                     | unassigned            |
| HE7.SSU256492 | Chromadorea; Chromadorida                                     | unassigned            |
| HE8.SSU829972 | Enoplea                                                       | unassigned            |

| OTU ID        | Best hit                                                                                   | Family identification |
|---------------|--------------------------------------------------------------------------------------------|-----------------------|
| HE8.SSU843570 | Chromadorea; Chromadorida                                                                  | unassigned            |
| HE9.SSU305678 | Chromadorea                                                                                | unassigned            |
| HF1.SSU759758 | Chromadorea; Araeolaimida; Leptolaimoidea; Leptolaimidae                                   | Leptolaimidae         |
| HF1.SSU763392 | Chromadorea; Chromadorida                                                                  | unassigned            |
| HF1.SSU764346 | Chromadorea; Chromadorida                                                                  | unassigned            |
| HF1.SSU774294 | Enoplea; Mononchida; Mononchina; Anatonchoidea                                             | unassigned            |
| HF1.SSU779114 | Chromadorea; Araeolaimida; Axonolaimoidea; Axonolaimidae;<br><i>Odontophora rectangula</i> | Axonolaimidae         |
| HF1.SSU780927 | Chromadorea; Araeolaimida                                                                  | unassigned            |
| HF2.SSU192072 | Chromadorea; Chromadorida; Chromadoridae; <i>Chromadora nudicapitata</i>                   | Chromadoridae         |
| HF2.SSU204352 | Chromadorea; Araeolaimida; Leptolaimoidea                                                  | unassigned            |
| HF2.SSU205129 | Chromadorea; Chromadorida                                                                  | unassigned            |
| HF2.SSU208147 | Nematoda                                                                                   | unassigned            |
| HF2.SSU210357 | Enoplea; Enoplida; Oncholaimoidea                                                          | unassigned            |
| HF3.SSU989895 | Chromadorea; Araeolaimida; Plectoidea                                                      | unassigned            |
| HF3.SSU990962 | Chromadorea                                                                                | unassigned            |
| HF4.SSU606153 | Chromadorea; Chromadorida; Chromadoridae                                                   | Chromadoridae         |
| HF4.SSU614317 | Chromadorea; Monhysterida; Comesomatidae; <i>Sabatieria</i> sp.                            | Comesomatidae         |
| HF4.SSU619471 | Chromadorea; Desmodorida; Richtersioidea                                                   | unassigned            |
| HF4.SSU620879 | Chromadorea; Chromadorida                                                                  | unassigned            |
| HF4.SSU622464 | Nematoda                                                                                   | unassigned            |
| HF4.SSU624085 | Chromadorea; Desmodorida                                                                   | unassigned            |
| HF4.SSU625424 | Chromadorea                                                                                | unassigned            |
| HF4.SSU628562 | Nematoda                                                                                   | unassigned            |
| HF4.SSU631524 | Chromadorea; Araeolaimida; Leptolaimoidea; Leptolaimidae;<br><i>Leptolaimus</i> sp.        | Leptolaimidae         |
| HF4.SSU632264 | Chromadorea                                                                                | unassigned            |
| HF4.SSU635045 | Chromadorea; Chromadorida                                                                  | unassigned            |
| HF5.SSU991188 | Enoplea; Enoplida; Oncholaimoidea                                                          | unassigned            |
| HF5.SSU995414 | Enoplea; Enoplida; Ironoidea; Ironidae                                                     | Ironidae              |
| HF6.SSU329881 | Chromadorea; Desmodorida; Desmodoridae; Desmodorinae                                       | Desmodoridae          |
| HF6.SSU338435 | Chromadorea                                                                                | unassigned            |
| HF6.SSU338739 | Chromadorea                                                                                | unassigned            |
| HF7.SSU385021 | Chromadorea                                                                                | unassigned            |
| HF7.SSU390110 | Chromadorea; Araeolaimida                                                                  | unassigned            |
| HF7.SSU398053 | Chromadorea; Araeolaimida; Leptolaimoidea                                                  | unassigned            |
| HF7.SSU407024 | Chromadorea; Chromadorida                                                                  | unassigned            |
| HF7.SSU407761 | Chromadorea; Araeolaimida                                                                  | unassigned            |
| HF7.SSU409331 | Enoplea                                                                                    | unassigned            |
| HF8.SSU795426 | Chromadorea                                                                                | unassigned            |
| HF9.SSU14048  | Chromadorea; Desmodorida; Richtersioidea                                                   | unassigned            |
| HF9.SSU14296  | Nematoda                                                                                   | unassigned            |

| OTU ID        | Best hit                                                                            | Family identification |
|---------------|-------------------------------------------------------------------------------------|-----------------------|
| HF9.SSU17250  | Enoplea; Enoplida; Enoploidea; Thoracostomopsidae                                   | Thoracostomopsidae    |
| HF9.SSU17844  | Chromadorea                                                                         | unassigned            |
| HF9.SSU18227  | Chromadorea; Chromadorida                                                           | unassigned            |
| HF9.SSU19963  | Chromadorea                                                                         | unassigned            |
| HF9.SSU20251  | Chromadorea; Desmodorida; Richtersioidea; Microlaimidae; <i>Calomicrolaimus</i> sp. | Microlaimidae         |
| HF9.SSU22538  | Enoplea; Mononchida; Mononchina; Anatonchoidea                                      | unassigned            |
| TF1.SSU676746 | Chromadorea                                                                         | unassigned            |
| TF1.SSU677162 | Chromadorea; Araeolaimida                                                           | unassigned            |
| TF1.SSU681557 | Enoplea                                                                             | unassigned            |
| TF1.SSU688192 | Chromadorea; Monhysterida                                                           | unassigned            |
| TF1.SSU692690 | Chromadorea                                                                         | unassigned            |
| TF1.SSU694267 | Chromadorea                                                                         | unassigned            |
| TF1.SSU694751 | Chromadorea                                                                         | unassigned            |
| TF1.SSU698227 | Chromadorea; Rhabditida; Teratocephaloidea                                          | unassigned            |
| TF1.SSU700188 | Chromadorea; Monhysterida; Monhysterida incertae sedis                              | unassigned            |
| TF1.SSU703579 | Chromadorea                                                                         | unassigned            |
| TF1.SSU710679 | Chromadorea; Chromadorida; Cyatholaimidae; <i>Paracanthonchus</i> sp.               | Cyatholaimidae        |
| TF1.SSU734804 | Chromadorea                                                                         | unassigned            |
| TF3.SSU956521 | Chromadorea; Monhysterida                                                           | unassigned            |
| TF3.SSU960449 | Chromadorea                                                                         | unassigned            |
| TF3.SSU966338 | Chromadorea                                                                         | unassigned            |
| TF4.SSU144249 | Chromadorea; Chromadorida                                                           | unassigned            |
| TF4.SSU150234 | Chromadorea; Desmodorida                                                            | unassigned            |
| TF5.SSU410031 | Nematoda                                                                            | unassigned            |
| TF5.SSU419519 | Chromadorea                                                                         | unassigned            |
| TF5.SSU430294 | Chromadorea; Monhysterida                                                           | unassigned            |
| TF5.SSU437076 | Chromadorea; Monhysterida; Comesomatidae; <i>Setosabatieria hilarula</i>            | Comesomatidae         |
| TF5.SSU444034 | Enoplea; Enoplida; Tripyloidea                                                      | unassigned            |
| TF5.SSU446087 | Nematoda                                                                            | unassigned            |
| TF5.SSU453472 | Enoplea                                                                             | unassigned            |
| TF5.SSU457543 | Chromadorea                                                                         | unassigned            |
| TF5.SSU459305 | Enoplea; Enoplida; Oncholaimoidea; Oncholaimidae; <i>Oncholaimus</i> sp.            | Oncholaimidae         |
| TF5.SSU466315 | Chromadorea; Monhysterida                                                           | unassigned            |
| TF6.SSU33463  | Enoplea                                                                             | unassigned            |
| TF6.SSU33935  | Chromadorea; Araeolaimida                                                           | unassigned            |
| TF6.SSU36442  | Chromadorea                                                                         | unassigned            |
| TF6.SSU37421  | Chromadorea; Desmodorida; Desmodoridae; Spiriniinae                                 | Desmodoridae          |
| TF6.SSU41803  | Chromadorea; Monhysterida; Xyalidae                                                 | Xyalidae              |
| TF6.SSU47996  | Enoplea; Enoplida; Oncholaimoidea; Enchelidiidae; <i>Pareurystomina</i> sp.         | Enchelidiidae         |
| TF6.SSU48167  | Chromadorea; Monhysterida; Comesomatidae; <i>Sabatieria</i> sp.                     | Comesomatidae         |

| OTU ID        | Best hit                                                                 | Family identification |
|---------------|--------------------------------------------------------------------------|-----------------------|
| TF6.SSU53456  | Enoplea; Enoplida; Oncholaimoidea; Oncholaimidae; <i>Viscosia</i> sp.    | Oncholaimidae         |
| TF6.SSU54250  | Chromadorea; Desmodorida; Richtersioidea                                 | unassigned            |
| TF6.SSU58877  | Chromadorea                                                              | unassigned            |
| TF6.SSU74955  | Chromadorea                                                              | unassigned            |
| TF6.SSU82210  | Chromadorea                                                              | unassigned            |
| TF6.SSU84268  | Chromadorea                                                              | unassigned            |
| TF6.SSU98667  | Nematoda                                                                 | unassigned            |
| TS1.SSU270885 | Chromadorea                                                              | unassigned            |
| TS1.SSU284163 | Annelida; Polychaeta; Scolecida                                          | unassigned            |
| TS2.SSU821962 | Enoplea; Enoplida; Tripyloidoidea                                        | unassigned            |
| TS2.SSU823349 | Enoplea; Enoplida; Tripyloidoidea                                        | unassigned            |
| TS3.SSU475561 | Chromadorea                                                              | unassigned            |
| TS3.SSU489684 | Chromadorea                                                              | unassigned            |
| TS3.SSU503133 | Enoplea; Enoplida; Tripyloidoidea                                        | unassigned            |
| TS3.SSU508400 | Chromadorea                                                              | unassigned            |
| TS4.SSU543236 | Enoplea                                                                  | unassigned            |
| TS4.SSU544032 | Chromadorea                                                              | unassigned            |
| TS5.SSU874117 | Enoplea                                                                  | unassigned            |
| TS5.SSU875407 | Chromadorea; Monhysterida; Comesomatidae; <i>Setosabatieria hilarula</i> | Comesomatidae         |
| TS5.SSU881546 | Chromadorea                                                              | unassigned            |
| TS5.SSU900338 | Chromadorea; Araeolaimida; Leptolaimoidea                                | unassigned            |
| TS5.SSU901243 | Enoplea                                                                  | unassigned            |
| TS6.SSU559765 | Enoplea; Enoplida; Tripyloidoidea                                        | unassigned            |
| TS6.SSU570763 | Chromadorea; Araeolaimida                                                | unassigned            |
| TS6.SSU587229 | Enoplea; Enoplida; Oncholaimoidea; Oncholaimidae                         | Oncholaimidae         |
| HE6.SSU372021 | Chromadorea; Monhysterida                                                | unassigned            |
