# Supplementary material for: Taxonomy assignment approach determines the efficiency of identification of OTUs in marine nematodes
Source: PubMed Central journal article supplement (PMC5579096; doi:10.1098/rsos.170315), 2017-08-16
Supplement: rsos170315supp9.pdf [file rsos170315supp9.pdf]

**Supplementary file for the article:**

Holovachov O, Haenel Q, Bourlat SJ, Jondelius U. Taxonomy assignment approach determines the efficiency of identification of OTUs in marine nematodes. *Royal Society Open Science*.

**Supplementary Table 6.** Results of tree-based taxonomy assignment using complete and partitioned query dataset.

| OTU ID        | Family identification (complete) | bootstrap % | Family identification (partitioned) | bootstrap % |
|---------------|----------------------------------|-------------|-------------------------------------|-------------|
| HE1.SSU848264 | unassigned                       | –           | unassigned                          | –           |
| HE1.SSU850987 | unassigned                       | –           | unassigned                          | –           |
| HE1.SSU856624 | Oxystominidae                    | 90          | Oxystominidae                       | 93          |
| HE1.SSU856738 | unassigned                       | –           | unassigned                          | –           |
| HE1.SSU858060 | unassigned                       | –           | Chromadoridae                       | 92          |
| HE1.SSU867071 | Selachinematidae                 | 86          | unassigned                          | –           |
| HE2.SSU637072 | unassigned                       | –           | unassigned                          | –           |
| HE2.SSU637135 | unassigned                       | –           | unassigned                          | –           |
| HE2.SSU644966 | unassigned                       | –           | unassigned                          | –           |
| HE2.SSU654005 | Rhabdodemaniidae                 | 100         | Rhabdodemaniidae                    | 100         |
| HE2.SSU655107 | Xyalidae                         | 70          | Xyalidae                            | 76          |
| HE2.SSU659506 | unassigned                       | –           | Chromadoridae                       | 91          |
| HE3.SSU110275 | Enoplidae                        | 100         | Enoplidae                           | 100         |
| HE3.SSU117415 | unassigned                       | –           | unassigned                          | –           |
| HE3.SSU118424 | unassigned                       | –           | Oxystominidae                       | 72          |
| HE3.SSU124287 | Thoracostomopsidae               | 84          | Thoracostomopsidae                  | 100         |
| HE3.SSU124998 | unassigned                       | –           | unassigned                          | –           |
| HE4.SSU913283 | unassigned                       | –           | unassigned                          | –           |
| HE5.SSU181724 | unassigned                       | –           | unassigned                          | –           |
| HE5.SSU188855 | Enchelidiidae                    | 100         | Enchelidiidae                       | 100         |
| HE6.SSU355777 | unassigned                       | –           | unassigned                          | –           |
| HE6.SSU358048 | unassigned                       | –           | unassigned                          | –           |
| HE6.SSU360897 | Desmodoridae                     | 77          | unassigned                          | –           |
| HE6.SSU361449 | Ironidae                         | 90          | Ironidae                            | 93          |
| HE6.SSU365256 | unassigned                       | –           | unassigned                          | –           |
| HE6.SSU368318 | unassigned                       | –           | unassigned                          | –           |
| HE6.SSU370544 | Xyalidae                         | 70          | Xyalidae                            | 99          |
| HE6.SSU378839 | Microlaimidae                    | 99          | Microlaimidae                       | 98          |
| HE6.SSU383414 | unassigned                       | –           | Comesomatidae                       | 90          |
| HE6.SSU383888 | unassigned                       | –           | Chromadoridae                       | 86          |
| HE7.SSU232624 | Leptolaimidae                    | 82          | Leptolaimidae                       | 92          |
| HE7.SSU256492 | unassigned                       | –           | unassigned                          | –           |
| HE8.SSU829972 | Anticomidae                      | 100         | Anticomidae                         | 100         |

| OTU ID        | Family identification (complete) | bootstrap % | Family identification (partitioned) | bootstrap % |
|---------------|----------------------------------|-------------|-------------------------------------|-------------|
| HE8.SSU843570 | unassigned                       | –           | unassigned                          | –           |
| HE9.SSU305678 | Xyalidae                         | 70          | unassigned                          | –           |
| HF1.SSU759758 | Camacolaimidae                   | 99          | Camacolaimidae                      | 100         |
| HF1.SSU763392 | unassigned                       | –           | unassigned                          | –           |
| HF1.SSU764346 | unassigned                       | –           | unassigned                          | –           |
| HF1.SSU774294 | unassigned                       | –           | unassigned                          | –           |
| HF1.SSU779114 | Axonolaimidae                    | 82          | Axonolaimidae                       | 75          |
| HF1.SSU780927 | unassigned                       | –           | unassigned                          | –           |
| HF2.SSU192072 | Chromadoridae                    | 91          | Chromadoridae                       | 100         |
| HF2.SSU204352 | Leptolaimidae                    | 82          | unassigned                          | –           |
| HF2.SSU205129 | unassigned                       | –           | unassigned                          | –           |
| HF2.SSU208147 | Selachinematidae                 | 86          | Selachinematidae                    | 88          |
| HF2.SSU210357 | Enchelidiidae                    | 85          | Enchelidiidae                       | 85          |
| HF3.SSU989895 | unassigned                       | –           | Camacolaimidae                      | 77          |
| HF3.SSU990962 | unassigned                       | –           | unassigned                          | –           |
| HF4.SSU606153 | unassigned                       | –           | unassigned                          | –           |
| HF4.SSU614317 | unassigned                       | –           | unassigned                          | –           |
| HF4.SSU619471 | Microlaimidae                    | 99          | Microlaimidae                       | 100         |
| HF4.SSU620879 | unassigned                       | –           | Chromadoridae                       | 100         |
| HF4.SSU622464 | unassigned                       | –           | unassigned                          | –           |
| HF4.SSU624085 | unassigned                       | –           | unassigned                          | –           |
| HF4.SSU625424 | unassigned                       | –           | Comesomatidae                       | 95          |
| HF4.SSU628562 | unassigned                       | –           | unassigned                          | –           |
| HF4.SSU631524 | Leptolaimidae                    | 94          | Leptolaimidae                       | 100         |
| HF4.SSU632264 | Diplopeltidae                    | 100         | Diplopeltidae                       | 100         |
| HF4.SSU635045 | Chromadoridae                    | 91          | Chromadoridae                       | 100         |
| HF5.SSU991188 | unassigned                       | –           | Oncholaimidae                       | 100         |
| HF5.SSU995414 | unassigned                       | –           | unassigned                          | –           |
| HF6.SSU329881 | Desmodoridae                     | 77          | Desmodoridae                        | 85          |
| HF6.SSU338435 | unassigned                       | –           | Chromadoridae                       | 97          |
| HF6.SSU338739 | unassigned                       | –           | unassigned                          | –           |
| HF7.SSU385021 | unassigned                       | –           | Chromadoridae                       | 97          |
| HF7.SSU390110 | unassigned                       | –           | unassigned                          | –           |
| HF7.SSU398053 | unassigned                       | –           | unassigned                          | –           |
| HF7.SSU407024 | unassigned                       | –           | unassigned                          | –           |
| HF7.SSU407761 | unassigned                       | –           | unassigned                          | –           |
| HF7.SSU409331 | unassigned                       | –           | unassigned                          | –           |
| HF8.SSU795426 | unassigned                       | –           | unassigned                          | –           |
| HF9.SSU14048  | unassigned                       | –           | unassigned                          | –           |
| HF9.SSU14296  | unassigned                       | –           | unassigned                          | –           |
| HF9.SSU17250  | unassigned                       | –           | Thoracostomopsidae                  | 89          |

| OTU ID        | Family identification (complete) | bootstrap % | Family identification (partitioned) | bootstrap % |
|---------------|----------------------------------|-------------|-------------------------------------|-------------|
| HF9.SSU17844  | unassigned                       | –           | unassigned                          | –           |
| HF9.SSU18227  | unassigned                       | –           | unassigned                          | –           |
| HF9.SSU19963  | unassigned                       | –           | unassigned                          | –           |
| HF9.SSU20251  | Microlaimidae                    | 99          | Microlaimidae                       | 97          |
| HF9.SSU22538  | unassigned                       | –           | unassigned                          | –           |
| TF1.SSU676746 | Ceramonematidae                  | 79          | Ceramonematidae                     | 80          |
| TF1.SSU677162 | unassigned                       | –           | unassigned                          | –           |
| TF1.SSU681557 | Oxystominidae                    | 90          | Oxystominidae                       | 89          |
| TF1.SSU688192 | Linhomoeidae                     | 96          | Linhomoeidae                        | 89          |
| TF1.SSU692690 | Selachinematidae                 | 86          | Selachinematidae                    | 95          |
| TF1.SSU694267 | unassigned                       | –           | unassigned                          | –           |
| TF1.SSU694751 | unassigned                       | –           | Chromadoridae                       | 98          |
| TF1.SSU698227 | unassigned                       | –           | unassigned                          | –           |
| TF1.SSU700188 | Cyartonematidae                  | 94          | Cyartonematidae                     | 89          |
| TF1.SSU703579 | unassigned                       | –           | unassigned                          | –           |
| TF1.SSU710679 | unassigned                       | –           | Cyatholaimidae                      | 95          |
| TF1.SSU734804 | unassigned                       | –           | unassigned                          | –           |
| TF3.SSU956521 | unassigned                       | –           | unassigned                          | –           |
| TF3.SSU960449 | unassigned                       | –           | unassigned                          | –           |
| TF3.SSU966338 | Xyalidae                         | 70          | Xyalidae                            | 78          |
| TF4.SSU144249 | unassigned                       | –           | Cyatholaimidae                      | 74          |
| TF4.SSU150234 | unassigned                       | –           | unassigned                          | –           |
| TF5.SSU410031 | unassigned                       | –           | unassigned                          | –           |
| TF5.SSU419519 | unassigned                       | –           | unassigned                          | –           |
| TF5.SSU430294 | Xyalidae                         | 70          | Xyalidae                            | 78          |
| TF5.SSU437076 | Comesomatidae                    | 93          | unassigned                          | –           |
| TF5.SSU444034 | Rhabdodemaniidae                 | 100         | Rhabdodemaniidae                    | 98          |
| TF5.SSU446087 | unassigned                       | –           | Tarvaidae                           | 91          |
| TF5.SSU453472 | Oxystominidae                    | 85          | Oxystominidae                       | 90          |
| TF5.SSU457543 | Oxystominidae                    | 85          | Oxystominidae                       | 94          |
| TF5.SSU459305 | Oncholaimidae                    | 75          | Oncholaimidae                       | 74          |
| TF5.SSU466315 | Xyalidae                         | 70          | Xyalidae                            | 100         |
| TF6.SSU33463  | Oxystominidae                    | 99          | Oxystominidae                       | 99          |
| TF6.SSU33935  | unassigned                       | –           | unassigned                          | –           |
| TF6.SSU36442  | unassigned                       | –           | unassigned                          | –           |
| TF6.SSU37421  | unassigned                       | –           | unassigned                          | –           |
| TF6.SSU41803  | unassigned                       | –           | Xyalidae                            | 93          |
| TF6.SSU47996  | Enchelidiidae                    | 75          | Enchelidiidae                       | 91          |
| TF6.SSU48167  | unassigned                       | –           | Comesomatidae                       | 90          |
| TF6.SSU53456  | Oncholaimidae                    | 71          | Oncholaimidae                       | 100         |
| TF6.SSU54250  | Microlaimidae                    | 99          | Microlaimidae                       | 100         |

| OTU ID        | Family identification (complete) | bootstrap % | Family identification (partitioned) | bootstrap % |
|---------------|----------------------------------|-------------|-------------------------------------|-------------|
| TF6.SSU58877  | unassigned                       | –           | Tarvaidae                           | 91          |
| TF6.SSU74955  | unassigned                       | –           | unassigned                          | –           |
| TF6.SSU82210  | unassigned                       | –           | unassigned                          | –           |
| TF6.SSU84268  | unassigned                       | –           | unassigned                          | –           |
| TF6.SSU98667  | unassigned                       | –           | unassigned                          | –           |
| TS1.SSU270885 | unassigned                       | –           | unassigned                          | –           |
| TS1.SSU284163 | unassigned                       | –           | unassigned                          | –           |
| TS2.SSU821962 | Tripyloididae                    | 100         | Tripyloididae                       | 100         |
| TS2.SSU823349 | Tripyloididae                    | 100         | Tripyloididae                       | 100         |
| TS3.SSU475561 | unassigned                       | –           | unassigned                          | –           |
| TS3.SSU489684 | Desmoscolecidae                  | 84          | unassigned                          | –           |
| TS3.SSU503133 | Tripyloididae                    | 100         | Tripyloididae                       | 100         |
| TS3.SSU508400 | unassigned                       | –           | unassigned                          | –           |
| TS4.SSU543236 | Oxystominidae                    | 90          | Oxystominidae                       | 93          |
| TS4.SSU544032 | unassigned                       | –           | unassigned                          | –           |
| TS5.SSU874117 | Oxystominidae                    | 100         | Oxystominidae                       | 100         |
| TS5.SSU875407 | Comesomatidae                    | 93          | unassigned                          | –           |
| TS5.SSU881546 | Xyalidae                         | 70          | unassigned                          | –           |
| TS5.SSU900338 | Leptolaimidae                    | 94          | Leptolaimidae                       | 99          |
| TS5.SSU901243 | Ironidae                         | 81          | Ironidae                            | 100         |
| TS6.SSU559765 | Tripyloididae                    | 100         | Tripyloididae                       | 100         |
| TS6.SSU570763 | unassigned                       | –           | unassigned                          | –           |
| TS6.SSU587229 | Oncholaimidae                    | 75          | Oncholaimidae                       | 100         |
| HE6.SSU372021 | Monhysteridae                    | 82          | Monhysteridae                       | 92          |
