# Supplementary material for: Taxonomy assignment approach determines the efficiency of identification of OTUs in marine nematodes
Source: PubMed Central journal article supplement (PMC5579096; doi:10.1098/rsos.170315), 2017-08-16
Supplement: rsos170315supp10.pdf [file rsos170315supp10.pdf]

**Supplementary file for the article:**

Holovachov O, Haenel Q, Bourlat SJ, Jondelius U. Taxonomy assignment approach determines the efficiency of identification of OTUs in marine nematodes. *Royal Society Open Science*.

**Supplementary Table 7.** Results of phylogeny-based taxonomy assignment using mothur and PaPaRa-based alignments.

| OTU ID        | Family identification (mothur) | likelihood % | Family identification (PaPaRa) | likelihood % |
|---------------|--------------------------------|--------------|--------------------------------|--------------|
| HE1.SSU848264 | Cyatholaimidae                 | 100          | Cyatholaimidae                 | 100          |
| HE1.SSU850987 | unassigned                     | –            | unassigned                     | –            |
| HE1.SSU856624 | Oxystominidae                  | 100          | Oxystominidae                  | 100          |
| HE1.SSU856738 | Microlaimidae                  | 100          | Microlaimidae                  | 100          |
| HE1.SSU858060 | Chromadoridae                  | 100          | Chromadoridae                  | 100          |
| HE1.SSU867071 | Selachinematidae               | 100          | Selachinematidae               | 100          |
| HE2.SSU637072 | unassigned                     | –            | unassigned                     | –            |
| HE2.SSU637135 | Chromadoridae                  | 100          | Chromadoridae                  | 100          |
| HE2.SSU644966 | Cyatholaimidae                 | 100          | Cyatholaimidae                 | 100          |
| HE2.SSU654005 | Rhabdodemaniidae               | NA           | Rhabdodemaniidae               | NA           |
| HE2.SSU655107 | Xyalidae                       | 97           | Xyalidae                       | 97           |
| HE2.SSU659506 | Chromadoridae                  | 100          | Chromadoridae                  | 100          |
| HE3.SSU110275 | Enoplidae                      | 100          | Enoplidae                      | 100          |
| HE3.SSU117415 | Cyatholaimidae                 | 100          | Cyatholaimidae                 | 100          |
| HE3.SSU118424 | Oxystominidae                  | 100          | Oxystominidae                  | 100          |
| HE3.SSU124287 | Thoracostomopsidae             | 100          | Thoracostomopsidae             | 100          |
| HE3.SSU124998 | unassigned                     | –            | unassigned                     | –            |
| HE4.SSU913283 | unassigned                     | –            | unassigned                     | –            |
| HE5.SSU181724 | unassigned                     | –            | unassigned                     | –            |
| HE5.SSU188855 | Enchelidiidae                  | 94           | Enchelidiidae                  | 94           |
| HE6.SSU355777 | unassigned                     | –            | unassigned                     | –            |
| HE6.SSU358048 | Chromadoridae                  | 100          | Chromadoridae                  | 100          |
| HE6.SSU360897 | unassigned                     | –            | unassigned                     | –            |
| HE6.SSU361449 | Ironidae                       | 100          | Ironidae                       | 100          |
| HE6.SSU365256 | Desmodoridae                   | 72           | Desmodoridae                   | 72           |
| HE6.SSU368318 | unassigned                     | –            | unassigned                     | –            |
| HE6.SSU370544 | Xyalidae                       | 97           | Xyalidae                       | 97           |
| HE6.SSU378839 | Microlaimidae                  | 100          | Microlaimidae                  | 100          |
| HE6.SSU383414 | Comesomatidae                  | 99           | Comesomatidae                  | 99           |
| HE6.SSU383888 | Chromadoridae                  | 100          | Chromadoridae                  | 100          |
| HE7.SSU232624 | Leptolaimidae                  | 99           | Leptolaimidae                  | 99           |
| HE7.SSU256492 | Chromadoridae                  | 100          | Chromadoridae                  | 100          |
| HE8.SSU829972 | Anticomidae                    | 100          | Anticomidae                    | 100          |

| OTU ID        | Family identification (mothur) | likelihood % | Family identification (PaPaRa) | likelihood % |
|---------------|--------------------------------|--------------|--------------------------------|--------------|
| HE8.SSU843570 | Chromadoridae                  | 100          | Chromadoridae                  | 100          |
| HE9.SSU305678 | Xyalidae                       | 97           | Xyalidae                       | 97           |
| HF1.SSU759758 | Camacolaimidae                 | 100          | Camacolaimidae                 | 100          |
| HF1.SSU763392 | Cyatholaimidae                 | 100          | Cyatholaimidae                 | 100          |
| HF1.SSU764346 | Cyatholaimidae                 | 100          | Cyatholaimidae                 | 100          |
| HF1.SSU774294 | Mermithidae                    | 100          | Mermithidae                    | 100          |
| HF1.SSU779114 | Axonolaimidae                  | 100          | Axonolaimidae                  | 100          |
| HF1.SSU780927 | unassigned                     | –            | unassigned                     | –            |
| HF2.SSU192072 | Chromadoridae                  | 100          | Chromadoridae                  | 100          |
| HF2.SSU204352 | unassigned                     | –            | unassigned                     | –            |
| HF2.SSU205129 | Chromadoridae                  | 100          | Chromadoridae                  | 100          |
| HF2.SSU208147 | Selachinematidae               | 100          | Selachinematidae               | 100          |
| HF2.SSU210357 | Enchelidiidae                  | 94           | Enchelidiidae                  | 94           |
| HF3.SSU989895 | Camacolaimidae                 | 100          | Camacolaimidae                 | 100          |
| HF3.SSU990962 | Chromadoridae                  | 100          | Chromadoridae                  | 100          |
| HF4.SSU606153 | Chromadoridae                  | 100          | Chromadoridae                  | 100          |
| HF4.SSU614317 | unassigned                     | –            | unassigned                     | –            |
| HF4.SSU619471 | Microlaimidae                  | 100          | Microlaimidae                  | 100          |
| HF4.SSU620879 | Chromadoridae                  | 100          | Chromadoridae                  | 100          |
| HF4.SSU622464 | unassigned                     | –            | unassigned                     | –            |
| HF4.SSU624085 | unassigned                     | –            | unassigned                     | –            |
| HF4.SSU625424 | Comesomatidae                  | 99           | Comesomatidae                  | 99           |
| HF4.SSU628562 | Desmodoridae                   | 72           | Desmodoridae                   | 72           |
| HF4.SSU631524 | Leptolaimidae                  | 99           | Leptolaimidae                  | 99           |
| HF4.SSU632264 | Diplopeltidae                  | 100          | Diplopeltidae                  | 100          |
| HF4.SSU635045 | Chromadoridae                  | 100          | Chromadoridae                  | 100          |
| HF5.SSU991188 | Oncholaimidae                  | 100          | Oncholaimidae                  | 100          |
| HF5.SSU995414 | Ironidae                       | 100          | Ironidae                       | 100          |
| HF6.SSU329881 | Desmodoridae                   | 72           | Desmodoridae                   | 72           |
| HF6.SSU338435 | Chromadoridae                  | 100          | Chromadoridae                  | 100          |
| HF6.SSU338739 | unassigned                     | –            | unassigned                     | –            |
| HF7.SSU385021 | Chromadoridae                  | 100          | Chromadoridae                  | 100          |
| HF7.SSU390110 | unassigned                     | –            | unassigned                     | –            |
| HF7.SSU398053 | Camacolaimidae                 | 100          | Camacolaimidae                 | 100          |
| HF7.SSU407024 | Achromadoridae                 | 97           | Achromadoridae                 | 97           |
| HF7.SSU407761 | Linhomoeidae                   | 99           | Linhomoeidae                   | 99           |
| HF7.SSU409331 | unassigned                     | –            | unassigned                     | –            |
| HF8.SSU795426 | unassigned                     | –            | unassigned                     | –            |
| HF9.SSU14048  | Microlaimidae                  | 100          | Microlaimidae                  | 100          |
| HF9.SSU14296  | Selachinematidae               | 100          | Selachinematidae               | 100          |
| HF9.SSU17250  | Thoracostomopsidae             | 100          | Thoracostomopsidae             | 100          |

| OTU ID        | Family identification (mothur) | likelihood % | Family identification (PaPaRa) | likelihood % |
|---------------|--------------------------------|--------------|--------------------------------|--------------|
| HF9.SSU17844  | unassigned                     | –            | unassigned                     | –            |
| HF9.SSU18227  | Chromadoridae                  | 100          | Chromadoridae                  | 100          |
| HF9.SSU19963  | unassigned                     | –            | unassigned                     | –            |
| HF9.SSU20251  | Microlaimidae                  | 100          | Microlaimidae                  | 100          |
| HF9.SSU22538  | unassigned                     | –            | unassigned                     | –            |
| TF1.SSU676746 | Ceramonematidae                | 100          | Ceramonematidae                | 100          |
| TF1.SSU677162 | unassigned                     | –            | unassigned                     | –            |
| TF1.SSU681557 | Oxystominidae                  | 100          | Oxystominidae                  | 100          |
| TF1.SSU688192 | unassigned                     | –            | unassigned                     | –            |
| TF1.SSU692690 | Selachinematidae               | 100          | Selachinematidae               | 100          |
| TF1.SSU694267 | Desmoscolecidae                | 99           | Desmoscolecidae                | 99           |
| TF1.SSU694751 | Chromadoridae                  | 100          | Chromadoridae                  | 100          |
| TF1.SSU698227 | Benthimermithidae              | NA           | Benthimermithidae              | NA           |
| TF1.SSU700188 | Cyartonematidae                | NA           | Cyartonematidae                | NA           |
| TF1.SSU703579 | unassigned                     | –            | unassigned                     | –            |
| TF1.SSU710679 | Cyatholaimidae                 | 100          | Cyatholaimidae                 | 100          |
| TF1.SSU734804 | Siphonolaimidae                | 99           | Siphonolaimidae                | 99           |
| TF3.SSU956521 | unassigned                     | –            | unassigned                     | –            |
| TF3.SSU960449 | Desmoscolecidae                | 99           | Desmoscolecidae                | 99           |
| TF3.SSU966338 | Xyalidae                       | 97           | Xyalidae                       | 97           |
| TF4.SSU144249 | Cyatholaimidae                 | 100          | Cyatholaimidae                 | 100          |
| TF4.SSU150234 | Desmodoridae                   | 99           | Desmodoridae                   | 99           |
| TF5.SSU410031 | unassigned                     | –            | unassigned                     | –            |
| TF5.SSU419519 | Desmoscolecidae                | 99           | Desmoscolecidae                | 99           |
| TF5.SSU430294 | Xyalidae                       | 97           | Xyalidae                       | 97           |
| TF5.SSU437076 | Comesomatidae                  | 99           | Comesomatidae                  | 99           |
| TF5.SSU444034 | Rhabdodemaniidae               | NA           | Rhabdodemaniidae               | NA           |
| TF5.SSU446087 | Tarvaiidae                     | NA           | Tarvaiidae                     | NA           |
| TF5.SSU453472 | Oxystominidae                  | 100          | Oxystominidae                  | 100          |
| TF5.SSU457543 | Oxystominidae                  | 100          | Oxystominidae                  | 100          |
| TF5.SSU459305 | Oncholaimidae                  | 100          | Oncholaimidae                  | 100          |
| TF5.SSU466315 | Xyalidae                       | 100          | Xyalidae                       | 100          |
| TF6.SSU33463  | Oxystominidae                  | 100          | Oxystominidae                  | 100          |
| TF6.SSU33935  | unassigned                     | –            | unassigned                     | –            |
| TF6.SSU36442  | Desmoscolecidae                | 99           | Desmoscolecidae                | 99           |
| TF6.SSU37421  | unassigned                     | –            | unassigned                     | –            |
| TF6.SSU41803  | Xyalidae                       | 97           | Xyalidae                       | 97           |
| TF6.SSU47996  | Enchelidiidae                  | 90           | Enchelidiidae                  | 90           |
| TF6.SSU48167  | Comesomatidae                  | 99           | Comesomatidae                  | 99           |
| TF6.SSU53456  | Oncholaimidae                  | 81           | Oncholaimidae                  | 81           |
| TF6.SSU54250  | Microlaimidae                  | 100          | Microlaimidae                  | 100          |

| OTU ID        | Family identification (mothur) | likelihood % | Family identification (PaPaRa) | likelihood % |
|---------------|--------------------------------|--------------|--------------------------------|--------------|
| TF6.SSU58877  | Tarvaiidae                     | 100          | Tarvaiidae                     | 100          |
| TF6.SSU74955  | Cyatholaimidae                 | 100          | Cyatholaimidae                 | 100          |
| TF6.SSU82210  | unassigned                     | –            | unassigned                     | –            |
| TF6.SSU84268  | unassigned                     | –            | unassigned                     | –            |
| TF6.SSU98667  | unassigned                     | –            | unassigned                     | –            |
| TS1.SSU270885 | Desmoscolecidae                | 99           | Desmoscolecidae                | 99           |
| TS1.SSU284163 | Desmoscolecidae                | 99           | Desmoscolecidae                | 99           |
| TS2.SSU821962 | Tripyloididae                  | 100          | Tripyloididae                  | 100          |
| TS2.SSU823349 | Tripyloididae                  | 100          | Tripyloididae                  | 100          |
| TS3.SSU475561 | unassigned                     | –            | unassigned                     | –            |
| TS3.SSU489684 | Desmoscolecidae                | 99           | Desmoscolecidae                | 99           |
| TS3.SSU503133 | Tripyloididae                  | 100          | Tripyloididae                  | 100          |
| TS3.SSU508400 | unassigned                     | –            | unassigned                     | –            |
| TS4.SSU543236 | Oxystominidae                  | 100          | Oxystominidae                  | 100          |
| TS4.SSU544032 | Desmoscolecidae                | 99           | Desmoscolecidae                | 99           |
| TS5.SSU874117 | Oxystominidae                  | 100          | Oxystominidae                  | 100          |
| TS5.SSU875407 | Comesomatidae                  | 99           | Comesomatidae                  | 99           |
| TS5.SSU881546 | Xyalidae                       | 97           | Xyalidae                       | 97           |
| TS5.SSU900338 | Leptolaimidae                  | 99           | Leptolaimidae                  | 99           |
| TS5.SSU901243 | Ironidae                       | 100          | Ironidae                       | 100          |
| TS6.SSU559765 | Tripyloididae                  | 100          | Tripyloididae                  | 100          |
| TS6.SSU570763 | unassigned                     | –            | unassigned                     | –            |
| TS6.SSU587229 | Oncholaimidae                  | 100          | Oncholaimidae                  | 100          |
| HE6.SSU372021 | Monhysteridae                  | 100          | Monhysteridae                  | 100          |
