# Supplementary material for: Taxonomy assignment approach determines the efficiency of identification of OTUs in marine nematodes
Source: PubMed Central journal article supplement (PMC5579096; doi:10.1098/rsos.170315), 2017-08-16
Supplement: rsos170315supp11.pdf [file rsos170315supp11.pdf]

**Supplementary file for the article:**

Holovachov O, Haenel Q, Bourlat SJ, Jondelius U. Taxonomy assignment approach determines the efficiency of identification of OTUs in marine nematodes. *Royal Society Open Science*.

**Supplementary Table 8.** Comparison of the results produced by different taxonomy assignment approaches and distribution (presence vs. absence) of different OTUs among study sites (HE – Hållö, flotation with MgCl<sub>2</sub>; HF – Hållö, flotation with H<sub>2</sub>O; TS – Telekabeln, syphoning; TF – Telekabeln, flotation with H<sub>2</sub>O).

| OTU ID        | Distribution |    |    |    | BLASTN         | CREST         | TREE-C           | TREE-P           | EPA (BOTH)       |
|---------------|--------------|----|----|----|----------------|---------------|------------------|------------------|------------------|
|               | HE           | HF | TS | TF | 52/139         | 26/139        | 56/139           | 67/139           | 105/139          |
| HE1.SSU848264 | *            | *  | –  | –  | Cyatholaimidae |               |                  |                  | Cyatholaimidae   |
| HE1.SSU850987 | *            | *  | –  | –  |                |               |                  |                  |                  |
| HE1.SSU856624 | *            | –  | –  | *  |                |               | Oxystominidae    | Oxystominidae    | Oxystominidae    |
| HE1.SSU856738 | *            | *  | –  | –  | Microlaimidae  | Microlaimidae |                  |                  | Microlaimidae    |
| HE1.SSU858060 | *            | –  | –  | –  |                |               |                  | Chromadoridae    | Chromadoridae    |
| HE1.SSU867071 | *            | –  | –  | –  |                |               | Selachinematidae |                  | Selachinematidae |
| HE2.SSU637072 | *            | *  | –  | –  |                |               |                  |                  |                  |
| HE2.SSU637135 | *            | *  | –  | –  |                | Chromadoridae |                  |                  | Chromadoridae    |
| HE2.SSU644966 | *            | –  | –  | –  | Cyatholaimidae |               |                  |                  | Cyatholaimidae   |
| HE2.SSU654005 | *            | *  | –  | –  |                |               | Rhabdodemaniidae | Rhabdodemaniidae | Rhabdodemaniidae |
| HE2.SSU655107 | *            | *  | –  | –  |                |               | Xyalidae         | Xyalidae         | Xyalidae         |
| HE2.SSU659506 | *            | *  | *  | *  | Chromadoridae  |               |                  | Chromadoridae    | Chromadoridae    |
| HE3.SSU110275 | *            | *  | –  | –  | Enoplidae      | Enoplidae     | Enoplidae        | Enoplidae        | Enoplidae        |
| HE3.SSU117415 | *            | –  | –  | *  | Cyatholaimidae |               |                  |                  | Cyatholaimidae   |
| HE3.SSU118424 | *            | –  | –  | –  |                |               |                  | Oxystominidae    | Oxystominidae    |

| OTU ID        | Distribution |    |    |    | BLASTN             | CREST              | TREE-C             | TREE-P             | EPA (BOTH)         |
|---------------|--------------|----|----|----|--------------------|--------------------|--------------------|--------------------|--------------------|
|               | HE           | HF | TS | TF | 92/139             | 26/139             | 54/139             | 67/139             | 105/139            |
| HE3.SSU124287 | *            | *  | –  | –  | Thoracostomopsidae | Thoracostomopsidae | Thoracostomopsidae | Thoracostomopsidae | Thoracostomopsidae |
| HE3.SSU124998 | *            | –  | –  | –  |                    |                    |                    |                    |                    |
| HE4.SSU913283 | *            | –  | –  | –  |                    |                    |                    |                    |                    |
| HE5.SSU181724 | *            | *  | –  | –  |                    |                    |                    |                    |                    |
| HE5.SSU188855 | *            | *  | *  | –  |                    |                    | Enchelidiidae      | Enchelidiidae      | Enchelidiidae      |
| HE6.SSU355777 | *            | *  | –  | –  | Achromadoridae     |                    |                    |                    |                    |
| HE6.SSU358048 | *            | –  | –  | –  | Chromadoridae      |                    |                    |                    | Chromadoridae      |
| HE6.SSU360897 | *            | –  | –  | –  |                    |                    | Desmodoridae       |                    |                    |
| HE6.SSU361449 | *            | *  | –  | –  | Ironidae           |                    | Ironidae           | Ironidae           | Ironidae           |
| HE6.SSU365256 | *            | –  | –  | –  |                    |                    |                    |                    | Desmodoridae       |
| HE6.SSU368318 | *            | *  | –  | –  |                    | Desmodoridae       |                    |                    |                    |
| HE6.SSU370544 | *            | –  | –  | –  |                    | Xyalidae           | Xyalidae           | Xyalidae           | Xyalidae           |
| HE6.SSU378839 | *            | –  | –  | –  |                    |                    | Microlaimidae      | Microlaimidae      | Microlaimidae      |
| HE6.SSU383414 | *            | –  | –  | –  | Comesomatidae      |                    |                    | Comesomatidae      | Comesomatidae      |
| HE6.SSU383888 | *            | *  | –  | *  | Chromadoridae      |                    |                    | Chromadoridae      | Chromadoridae      |
| HE7.SSU232624 | *            | *  | –  | *  |                    |                    | Leptolaimidae      | Leptolaimidae      | Leptolaimidae      |
| HE7.SSU256492 | *            | *  | *  | *  | Chromadoridae      |                    |                    |                    | Chromadoridae      |
| HE8.SSU829972 | *            | *  | *  | *  |                    |                    | Anticomidae        | Anticomidae        | Anticomidae        |
| HE8.SSU843570 | *            | *  | –  | –  | Chromadoridae      |                    |                    |                    | Chromadoridae      |
| HE9.SSU305678 | *            | *  | –  | *  |                    |                    | Xyalidae           |                    | Xyalidae           |
| HF1.SSU759758 | –            | *  | –  | –  |                    | Leptolaimidae      | Camacolaimidae     | Camacolaimidae     | Camacolaimidae     |
| HF1.SSU763392 | *            | *  | –  | –  | Cyatholaimidae     |                    |                    |                    | Cyatholaimidae     |
| HF1.SSU764346 | *            | *  | *  | *  | Cyatholaimidae     |                    |                    |                    | Cyatholaimidae     |
| HF1.SSU774294 | *            | *  | –  | –  | Mermithidae        |                    |                    |                    | Mermithidae        |
| HF1.SSU779114 | *            | *  | *  | *  |                    | Axonolaimidae      | Axonolaimidae      | Axonolaimidae      | Axonolaimidae      |

| OTU ID        | Distribution |    |    |    | BLASTN         | CREST         | TREE-C           | TREE-P           | EPA (BOTH)       |
|---------------|--------------|----|----|----|----------------|---------------|------------------|------------------|------------------|
|               | HE           | HF | TS | TF | 92/139         | 26/139        | 54/139           | 67/139           | 105/139          |
| HF1.SSU780927 | –            | *  | *  | –  |                |               |                  |                  |                  |
| HF2.SSU192072 | –            | *  | –  | –  |                | Chromadoridae | Chromadoridae    | Chromadoridae    | Chromadoridae    |
| HF2.SSU204352 | –            | *  | –  | –  |                |               | Leptolaimidae    |                  |                  |
| HF2.SSU205129 | *            | *  | –  | –  |                |               |                  |                  | Chromadoridae    |
| HF2.SSU208147 | *            | *  | –  | *  |                |               | Selachinematidae | Selachinematidae | Selachinematidae |
| HF2.SSU210357 | –            | *  | –  | –  | Enchelidiidae  |               | Enchelidiidae    | Enchelidiidae    | Enchelidiidae    |
| HF3.SSU989895 | *            | *  | –  | –  |                |               |                  | Camacolaimidae   | Camacolaimidae   |
| HF3.SSU990962 | –            | *  | –  | –  | Chromadoridae  |               |                  |                  | Chromadoridae    |
| HF4.SSU606153 | *            | *  | *  | *  | Chromadoridae  | Chromadoridae |                  |                  | Chromadoridae    |
| HF4.SSU614317 | *            | *  | –  | *  | Comesomatidae  | Comesomatidae |                  |                  |                  |
| HF4.SSU619471 | *            | *  | –  | –  | Microlaimidae  |               | Microlaimidae    | Microlaimidae    | Microlaimidae    |
| HF4.SSU620879 | –            | *  | –  | –  | Chromadoridae  |               |                  | Chromadoridae    | Chromadoridae    |
| HF4.SSU622464 | –            | *  | –  | –  | Plectidae      |               |                  |                  |                  |
| HF4.SSU624085 | *            | *  | –  | –  |                |               |                  |                  |                  |
| HF4.SSU625424 | *            | *  | –  | –  |                |               |                  | Comesomatidae    | Comesomatidae    |
| HF4.SSU628562 | –            | *  | –  | –  |                |               |                  |                  | Desmodoridae     |
| HF4.SSU631524 | –            | *  | –  | –  |                | Leptolaimidae | Leptolaimidae    | Leptolaimidae    | Leptolaimidae    |
| HF4.SSU632264 | –            | *  | –  | –  |                |               | Diplopeltidae    | Diplopeltidae    | Diplopeltidae    |
| HF4.SSU635045 | *            | *  | –  | –  |                |               | Chromadoridae    | Chromadoridae    | Chromadoridae    |
| HF5.SSU991188 | *            | *  | –  | –  |                |               |                  | Oncholaimidae    | Oncholaimidae    |
| HF5.SSU995414 | –            | *  | –  | –  | Rhabdolaimidae | Ironidae      |                  |                  | Ironidae         |
| HF6.SSU329881 | *            | *  | *  | *  |                | Desmodoridae  | Desmodoridae     | Desmodoridae     | Desmodoridae     |
| HF6.SSU338435 | –            | *  | –  | –  |                |               |                  | Chromadoridae    | Chromadoridae    |
| HF6.SSU338739 | *            | *  | –  | –  |                |               |                  |                  |                  |

| OTU ID        | Distribution |    |    |    | BLASTN             | CREST              | TREE-C           | TREE-P             | EPA (BOTH)         |
|---------------|--------------|----|----|----|--------------------|--------------------|------------------|--------------------|--------------------|
|               | HE           | HF | TS | TF | 92/139             | 26/139             | 54/139           | 67/139             | 105/139            |
| HF7.SSU385021 | –            | *  | –  | –  | Chromadoridae      |                    |                  | Chromadoridae      | Chromadoridae      |
| HF7.SSU390110 | *            | *  | *  | *  |                    |                    |                  |                    |                    |
| HF7.SSU398053 | –            | *  | –  | –  |                    |                    |                  |                    | Camacolaimidae     |
| HF7.SSU407024 | *            | *  | –  | *  |                    |                    |                  |                    | Achromadoridae     |
| HF7.SSU407761 | *            | *  | –  | –  |                    |                    |                  |                    | Linhomoeidae       |
| HF7.SSU409331 | –            | *  | –  | –  |                    |                    |                  |                    |                    |
| HF8.SSU795426 | –            | *  | –  | –  | Cyatholaimidae     |                    |                  |                    |                    |
| HF9.SSU14048  | –            | *  | –  | –  |                    |                    |                  |                    | Microaimidae       |
| HF9.SSU14296  | –            | *  | –  | –  |                    |                    |                  |                    | Selachinematidae   |
| HF9.SSU17250  | –            | *  | –  | –  | Thoracostomopsidae | Thoracostomopsidae |                  | Thoracostomopsidae | Thoracostomopsidae |
| HF9.SSU17844  | *            | *  | –  | –  |                    |                    |                  |                    |                    |
| HF9.SSU18227  | –            | *  | –  | –  | Chromadoridae      |                    |                  |                    | Chromadoridae      |
| HF9.SSU19963  | –            | *  | –  | –  |                    |                    |                  |                    |                    |
| HF9.SSU20251  | *            | *  | *  | *  | Microaimidae       | Microaimidae       | Microaimidae     | Microaimidae       | Microaimidae       |
| HF9.SSU22538  | –            | *  | –  | –  | Mermithidae        |                    |                  |                    |                    |
| TF1.SSU676746 | –            | –  | –  | *  |                    |                    | Ceramonematidae  | Ceramonematidae    | Ceramonematidae    |
| TF1.SSU677162 | –            | –  | –  | *  |                    |                    |                  |                    |                    |
| TF1.SSU681557 | –            | –  | *  | *  |                    |                    | Oxystominidae    | Oxystominidae      | Oxystominidae      |
| TF1.SSU688192 | –            | –  | –  | *  | Linhomoeidae       |                    | Linhomoeidae     | Linhomoeidae       |                    |
| TF1.SSU692690 | –            | –  | –  | *  | Selachinematidae   |                    | Selachinematidae | Selachinematidae   | Selachinematidae   |
| TF1.SSU694267 | –            | –  | –  | *  |                    |                    |                  |                    | Desmoscolecidae    |
| TF1.SSU694751 | –            | –  | –  | *  | Chromadoridae      |                    |                  | Chromadoridae      | Chromadoridae      |
| TF1.SSU698227 | –            | –  | –  | *  | Teratocephalidae   |                    |                  |                    | Benthimermithidae  |
| TF1.SSU700188 | –            | –  | –  | *  | Linhomoeidae       |                    | Cyartonematidae  | Cyartonematidae    | Cyartonematidae    |

| OTU ID        | Distribution |    |    |    | BLASTN          | CREST          | TREE-C           | TREE-P           | EPA (BOTH)       |
|---------------|--------------|----|----|----|-----------------|----------------|------------------|------------------|------------------|
|               | HE           | HF | TS | TF | 92/139          | 26/139         | 54/139           | 67/139           | 105/139          |
| TF1.SSU703579 | –            | –  | –  | *  | Siphonolaimidae |                |                  |                  |                  |
| TF1.SSU710679 | *            | *  | *  | *  | Cyatholaimidae  | Cyatholaimidae |                  | Cyatholaimidae   | Cyatholaimidae   |
| TF1.SSU734804 | –            | –  | –  | *  | Siphonolaimidae |                |                  |                  | Siphonolaimidae  |
| TF3.SSU956521 | –            | –  | –  | *  | Comesomatidae   |                |                  |                  |                  |
| TF3.SSU960449 | –            | –  | –  | *  |                 |                |                  |                  | Desmoscolecidae  |
| TF3.SSU966338 | *            | *  | *  | *  |                 |                | Xyalidae         | Xyalidae         | Xyalidae         |
| TF4.SSU144249 | *            | *  | *  | *  |                 |                |                  | Cyatholaimidae   | Cyatholaimidae   |
| TF4.SSU150234 | –            | –  | *  | *  | Desmodoridae    |                |                  |                  | Desmodoridae     |
| TF5.SSU410031 | –            | –  | –  | *  |                 |                |                  |                  |                  |
| TF5.SSU419519 | *            | *  | *  | *  |                 |                |                  |                  | Desmoscolecidae  |
| TF5.SSU430294 | *            | *  | *  | *  |                 |                | Xyalidae         | Xyalidae         | Xyalidae         |
| TF5.SSU437076 | –            | –  | *  | *  | Comesomatidae   | Comesomatidae  | Comesomatidae    |                  | Comesomatidae    |
| TF5.SSU444034 | *            | *  | *  | *  |                 |                | Rhabdodemaniidae | Rhabdodemaniidae | Rhabdodemaniidae |
| TF5.SSU446087 | –            | –  | –  | *  |                 |                |                  | Tarvaiidae       | Tarvaiidae       |
| TF5.SSU453472 | –            | –  | –  | *  |                 |                | Oxystominidae    | Oxystominidae    | Oxystominidae    |
| TF5.SSU457543 | –            | –  | *  | *  |                 |                | Oxystominidae    | Oxystominidae    | Oxystominidae    |
| TF5.SSU459305 | –            | –  | –  | *  | Oncholaimidae   | Oncholaimidae  | Oncholaimidae    | Oncholaimidae    | Oncholaimidae    |
| TF5.SSU466315 | –            | –  | *  | *  |                 |                | Xyalidae         | Xyalidae         | Xyalidae         |
| TF6.SSU33463  | *            | *  | *  | *  |                 |                | Oxystominidae    | Oxystominidae    | Oxystominidae    |
| TF6.SSU33935  | *            | –  | –  | *  |                 |                |                  |                  |                  |
| TF6.SSU36442  | –            | –  | –  | *  |                 |                |                  |                  | Desmoscolecidae  |
| TF6.SSU37421  | –            | –  | *  | *  |                 | Desmodoridae   |                  |                  |                  |
| TF6.SSU41803  | –            | –  | –  | *  |                 | Xyalidae       |                  | Xyalidae         | Xyalidae         |
| TF6.SSU47996  | –            | –  | *  | *  | Oncholaimidae   | Enchelidiidae  | Enchelidiidae    | Enchelidiidae    | Enchelidiidae    |

| OTU ID        | Distribution |    |    |    | BLASTN          | CREST         | TREE-C          | TREE-P         | EPA (BOTH)      |
|---------------|--------------|----|----|----|-----------------|---------------|-----------------|----------------|-----------------|
|               | HE           | HF | TS | TF | 92/139          | 26/139        | 54/139          | 67/139         | 105/139         |
| TF6.SSU48167  | *            | *  | *  | *  | Comesomatidae   | Comesomatidae |                 | Comesomatidae  | Comesomatidae   |
| TF6.SSU53456  | *            | *  | *  | *  |                 | Oncholaimidae | Oncholaimidae   | Oncholaimidae  | Oncholaimidae   |
| TF6.SSU54250  | -            | -  | *  | *  | Microalaimidae  |               | Microalaimidae  | Microalaimidae | Microalaimidae  |
| TF6.SSU58877  | -            | -  | -  | *  |                 |               |                 | Tarvaidae      | Tarvaidae       |
| TF6.SSU74955  | -            | -  | -  | *  | Cyatholaimidae  |               |                 |                | Cyatholaimidae  |
| TF6.SSU82210  | -            | -  | *  | *  |                 |               |                 |                |                 |
| TF6.SSU84268  | -            | -  | -  | *  |                 |               |                 |                |                 |
| TF6.SSU98667  | -            | -  | -  | *  |                 |               |                 |                |                 |
| TS1.SSU270885 | -            | -  | *  | -  |                 |               |                 |                | Desmoscolecidae |
| TS1.SSU284163 | -            | -  | *  | -  |                 |               |                 |                | Desmoscolecidae |
| TS2.SSU821962 | *            | *  | *  | *  | Tripyloididae   |               | Tripyloididae   | Tripyloididae  | Tripyloididae   |
| TS2.SSU823349 | *            | -  | *  | *  |                 |               | Tripyloididae   | Tripyloididae  | Tripyloididae   |
| TS3.SSU475561 | -            | -  | *  | -  | Siphonolaimidae |               |                 |                |                 |
| TS3.SSU489684 | *            | *  | *  | *  |                 |               | Desmoscolecidae |                | Desmoscolecidae |
| TS3.SSU503133 | -            | -  | *  | -  | Tripyloididae   |               | Tripyloididae   | Tripyloididae  | Tripyloididae   |
| TS3.SSU508400 | -            | -  | *  | *  |                 |               |                 |                |                 |
| TS4.SSU543236 | -            | -  | *  | -  |                 |               | Oxystominidae   | Oxystominidae  | Oxystominidae   |
| TS4.SSU544032 | -            | *  | *  | *  |                 |               |                 |                | Desmoscolecidae |
| TS5.SSU874117 | -            | -  | *  | *  |                 |               | Oxystominidae   | Oxystominidae  | Oxystominidae   |
| TS5.SSU875407 | -            | -  | *  | *  | Comesomatidae   | Comesomatidae | Comesomatidae   |                | Comesomatidae   |
| TS5.SSU881546 | -            | -  | *  | -  |                 |               | Xyalidae        |                | Xyalidae        |
| TS5.SSU900338 | -            | -  | *  | -  |                 |               | Leptolaimidae   | Leptolaimidae  | Leptolaimidae   |
| TS5.SSU901243 | -            | -  | *  | *  |                 |               | Ironidae        | Ironidae       | Ironidae        |

| OTU ID        | Distribution |    |    |    | BLASTN        | CREST         | TREE-C        | TREE-P        | EPA (BOTH)    |
|---------------|--------------|----|----|----|---------------|---------------|---------------|---------------|---------------|
|               | HE           | HF | TS | TF | 92/139        | 26/139        | 54/139        | 67/139        | 105/139       |
| TS6.SSU559765 | -            | -  | *  | -  |               |               | Tripyloididae | Tripyloididae | Tripyloididae |
| TS6.SSU570763 | -            | -  | *  | -  |               |               |               |               |               |
| TS6.SSU587229 | *            | *  | *  | *  | Oncholaimidae | Oncholaimidae | Oncholaimidae | Oncholaimidae | Oncholaimidae |
| HE6.SSU372021 | *            | -  | -  | -  |               |               | Monhysteridae | Monhysteridae | Monhysteridae |
