# Supplementary material for: Taxonomy assignment approach determines the efficiency of identification of OTUs in marine nematodes
Source: PubMed Central journal article supplement (PMC5579096; doi:10.1098/rsos.170315), 2017-08-16
Supplement: rsos170315supp12.pdf [file rsos170315supp12.pdf]

**Supplementary file for the article:**

Holovachov O, Haenel Q, Bourlat SJ, Jondelius U. Taxonomy assignment approach determines the efficiency of identification of OTUs in marine nematodes. *Royal Society Open Science*.

**Supplementary Table 9.** Number of taxa (species/OTUs) per family recovered in morphology-based identification and best scoring taxonomy assignment approach (EPA) grouped per each site and extraction method.

|                             | Hållö                          |           |                              |           | Telekabeln       |           |                              |           |
|-----------------------------|--------------------------------|-----------|------------------------------|-----------|------------------|-----------|------------------------------|-----------|
|                             | Flotation (MgCl <sub>2</sub> ) |           | Flotation (H <sub>2</sub> O) |           | Siphoning        |           | Flotation (H <sub>2</sub> O) |           |
|                             | morphology based               | barcoding | morphology based             | barcoding | morphology based | barcoding | morphology based             | barcoding |
| <b>ORDER ENOPLIDA</b>       |                                |           |                              |           |                  |           |                              |           |
| Enoplidae                   | 1                              | 1         | 1                            | 1         | 0                | 0         | 0                            | 0         |
| Thoracostomopsidae          | 2                              | 1         | 2                            | 2         | 1                | 0         | 1                            | 0         |
| Phanodermatidae             | 0                              | 0         | 1                            | 0         | 0                | 0         | 0                            | 0         |
| Anticomidae                 | 1                              | 1         | 1                            | 1         | 1                | 1         | 1                            | 1         |
| Oncholaimidae               | 3                              | 3         | 3                            | 3         | 4                | 2         | 3                            | 3         |
| Enchelidiidae               | 2                              | 1         | 2                            | 2         | 2                | 2         | 2                            | 1         |
| Leptosomatidae              | 0                              | 0         | 1                            | 0         | 0                | 0         | 0                            | 0         |
| Ironidae                    | 0                              | 1         | 0                            | 2         | 1                | 1         | 1                            | 1         |
| Oxystominidae               | 4                              | 3         | 5                            | 1         | 15               | 5         | 15                           | 6         |
| Tripyloididae               | 0                              | 2         | 1                            | 1         | 2                | 4         | 2                            | 2         |
| Xennellidae                 | 1                              | NA        | 1                            | NA        | 0                | NA        | 0                            | NA        |
| Trefusiidae                 | 0                              | 0         | 0                            | 0         | 0                | 0         | 1                            | 0         |
| <b>ORDER MERMITHIDA</b>     |                                |           |                              |           |                  |           |                              |           |
| Mermithidae                 | 0                              | 1         | 0                            | 1         | 0                | 0         | 0                            | 0         |
| <b>ORDER TRIPLONCHIDA</b>   |                                |           |                              |           |                  |           |                              |           |
| Pandolaimidae               | 0                              | NA        | 0                            | NA        | 1                | NA        | 1                            | NA        |
| Rhabdodemaniidae            | 1                              | 2         | 1                            | 2         | 1                | 1         | 1                            | 1         |
| <b>ORDER DESMOSCOLECIDA</b> |                                |           |                              |           |                  |           |                              |           |
| Desmoscolecidae             | 3                              | 2         | 3                            | 3         | 4                | 5         | 4                            | 6         |
| Meyliidae                   | 0                              | NA        | 2                            | NA        | 0                | NA        | 0                            | NA        |
| Cyartonematidae             | 0                              | 0         | 0                            | 0         | 0                | 0         | 1                            | 1         |
| <b>ORDER CHROMADORIDA</b>   |                                |           |                              |           |                  |           |                              |           |
| Achromadoridae              | 0                              | 1         | 0                            | 1         | 0                | 0         | 0                            | 1         |
| Chromadoridae               | 14                             | 10        | 13                           | 14        | 7                | 3         | 6                            | 5         |
| Cyatholaimidae              | 8                              | 7         | 9                            | 5         | 4                | 3         | 3                            | 5         |
| Selachinematidae            | 4                              | 2         | 4                            | 2         | 2                | 0         | 4                            | 2         |

|                               | Hållö                          |           |                              |           | Telekabeln       |           |                              |           |
|-------------------------------|--------------------------------|-----------|------------------------------|-----------|------------------|-----------|------------------------------|-----------|
|                               | Flotation (MgCl <sub>2</sub> ) |           | Flotation (H <sub>2</sub> O) |           | Siphoning        |           | Flotation (H <sub>2</sub> O) |           |
|                               | morphology based               | barcoding | morphology based             | barcoding | morphology based | barcoding | morphology based             | barcoding |
| <b>ORDER DESMODORIDA</b>      |                                |           |                              |           |                  |           |                              |           |
| Desmodoridae                  | 10                             | 2         | 11                           | 2         | 4                | 2         | 4                            | 2         |
| Epsilonematidae               | 2                              | 0         | 2                            | 0         | 0                | 0         | 0                            | 0         |
| Draconematidae                | 0                              | 0         | 1                            | 0         | 0                | 0         | 0                            | 0         |
| Microlaimidae                 | 6                              | 4         | 7                            | 4         | 1                | 2         | 4                            | 2         |
| Monoposthiidae                | 1                              | 0         | 1                            | 0         | 1                | 0         | 0                            | 0         |
| Richtersiidae                 | 0                              | NA        | 0                            | NA        | 1                | NA        | 1                            | NA        |
| <b>ORDER MONHYSTERIDA</b>     |                                |           |                              |           |                  |           |                              |           |
| Xyalidae                      | 7                              | 5         | 9                            | 4         | 3                | 4         | 4                            | 5         |
| Sphaerolaimidae               | 0                              | 0         | 0                            | 0         | 3                | 0         | 3                            | 0         |
| Monhysteridae                 | 1                              | 1         | 1                            | 0         | 0                | 0         | 0                            | 0         |
| Siphonolaimidae               | 1                              | 0         | 1                            | 0         | 0                | 0         | 1                            | 1         |
| Linhomoeidae                  | 2                              | 1         | 2                            | 1         | 5                | 0         | 6                            | 0         |
| <b>ORDER ARAEOLAIMIDA</b>     |                                |           |                              |           |                  |           |                              |           |
| Comesomatidae                 | 2                              | 3         | 1                            | 2         | 3                | 3         | 4                            | 3         |
| Axonolaimidae                 | 3                              | 1         | 2                            | 1         | 2                | 1         | 2                            | 1         |
| Diplopeltidae                 | 2                              | 0         | 2                            | 1         | 6                | 0         | 6                            | 0         |
| <b>ORDER PLECTIDA</b>         |                                |           |                              |           |                  |           |                              |           |
| Leptolaimidae                 | 4                              | 1         | 4                            | 2         | 2                | 1         | 6                            | 1         |
| Camacolaimidae                | 2                              | 1         | 4                            | 3         | 2                | 0         | 4                            | 0         |
| Rhadinematidae                | 0                              | NA        | 0                            | NA        | 1                | NA        | 1                            | NA        |
| Ceramonematidae               | 0                              | 0         | 0                            | 0         | 1                | 0         | 2                            | 1         |
| Diplopeltoideidae             | 1                              | NA        | 1                            | NA        | 1                | NA        | 4                            | NA        |
| Tarvaiidae                    | 0                              | 0         | 1                            | 0         | 0                | 0         | 0                            | 2         |
| Tubolaimoididae               | 0                              | NA        | 1                            | NA        | 0                | NA        | 0                            | NA        |
| Paramicrolaimidae             | 0                              | NA        | 0                            | NA        | 1                | NA        | 1                            | NA        |
| Aegialoalaimidae              | 0                              | NA        | 0                            | NA        | 0                | NA        | 1                            | NA        |
| <b>ORDER BENTHIMERMITHIDA</b> |                                |           |                              |           |                  |           |                              |           |
| Benthimermithidae             | 0                              | 0         | 0                            | 0         | 0                | 0         | 0                            | 1         |
|                               |                                |           |                              |           |                  |           |                              |           |
| Unidentified taxa             | 1                              | 14        | 11                           | 17        | 8                | 7         | 21                           | 13        |
