# Supplementary material for: Taxonomy assignment approach determines the efficiency of identification of OTUs in marine nematodes
Source: PubMed Central journal article supplement (PMC5579096; doi:10.1098/rsos.170315), 2017-08-16
Supplement: rsos170315supp13.pdf [file rsos170315supp13.pdf]

## Supplementary file for the article:

Holovachov O, Haenel Q, Bourlat SJ, Jondelius U. Taxonomy assignment approach determines the efficiency of identification of OTUs in marine nematodes. *Royal Society Open Science*.

## Supplementary Data 1. Nematode OTU sequences used in this study.

```
>HE1_SSU848264
ATGCATGTCTAAGCAAGAGCCTAGAAAATGGTGAAGCCGCGAACAGCTCATTACAACAGCCATAGTTTATTGAATCGTCTCTCATATACT
TGGATACCTTTGGTAATTCTAGAGCTAATACACGCACCAAACCTCTGAGCTGAGGCAAGGAGTGCATTTATTAGAACAAAACCAATGGGC
TTCGGCCCTGTTTTGGTGAATCTGAATAACTCAGTTGATCGCACAGTCTCGCACTGGCGACGTATCTTTCAAGTGTCTGCCTTATCAAC
TGTCGATGGTAGTTTATATGACTACCATGGTTGTAACGGGTAACGGAGAATAAGGGTTCGACTCCGGAGAGGGAGCCTGAGAAATGGCT
ACCACA
>HE1_SSU850987
ATGCGTGTCTAAGCACAAACTGATTTAAGGTGAAGCCGCGAATGGCTCATTACAACAGCCATAGTTTCTTGGATCTTACTTCTACTTGG
ATAACTGTAGTAATTCTAGAGCTAATACATGCGTCAAGCTTCAACCTCATGGAAGAAACACATTTATTAGATCAAAACCAATCGGGCTT
TGCTTGTTTTGTTGATGAATCTGAATAACTCTGCCAATTGCATGGTCTTTGCACCGGTGACATATCTTTCAAGTGTCTGCCTTATCAAC
TGTTGATGGTAGTTTATATGACTACCATGGTTGTAACGGGTAACGGAGAATCAGGGTTCGACTCCGGAGAGGGAGCCCAGAAACGGCT
ACCACA
>HE1_SSU856624
ATGCATGTCTCAGCACACGCCAATGTATGGTAAAGCCGCGAATGGCTCATTACAACAGCCACCGTTTATTAGATCATCCTTCTTACTTG
GATAACTGTGGAAAAGCTAGAGCTAATACATGCTACAAGCTCTGACCTTACGGAAAAGAGCGCATTTATTAGAACAAAACCAATCGGACT
TTGTCCGTTGTTTGGTGAATCTGAATAACTAAGCAGATCGCACGGTCTTAGAACCGGCGACATATCGTTCAAATGTCTGCCTTATCAAC
TTTCGATGGTAGTTTATGCGCCTACCATGGTTGTAACGGGTAACGAAGAATCAGGGTTCGACTCCGGAGAGGGAGCCTGAGAAACGGCT
ACCACA
>HE1_SSU856738
ATGCATGTCTAAGTACAAGCCTCTTTAAGGTGAAACCGCGAATGGCTCATTAAATCACACCTAATATACTGGATAGTATACAGTTACTT
GGATAACTGTGGTAATTCTAGAGCTAATACACGCATTTCAAGTTCGACGCAAGAAGGAACGCATTTATTAGAACAAAACCAATCGGGCT
TGCCCGTTGTTTGGTGAATCTGAATAACTCCGCAGATCGCATGGTCTAGCACCGGCGACATATCTTTCAAGTGTCTGCCTTATCAACTT
TCGATGGTAGTTTATGCTGACTACCATGGTTGTTACGGGTAACGGAGAATTAGGGTTCGACTCCGGAGAGGGAGCCTGAGAAACGGCTAC
CACA
>HE1_SSU858060
ATGCATGTCTAAGCATAAACCGAATATGGTAAAGCCGCGAATGGCTCATTACAACAGCCATAGTTTATTGGATCTTAGAGTCCTACTTG
GATACCTGTGGTAATTCTAGAGCTAATACACGCAATCAAGCCCAACCTTACGGGCGGGGCGCATTTATTAGAACAAAACCAATGGCT
TCGGCCATAGATTGGTGAATCTGAATAACTACGCTGATCGCACGGCTTGTCGCCGCGACGTATCCTTCCAAGTGTGCCCTATCAACT
CTCGACTGTGGCATAGACGCCACAGTGGTTTTGACGGGTAACGGGAATCAGGGTTCGATTCCGGAGAGGGAGCCTGAGAAACGGCTA
CCACA
>HE1_SSU867071
ATGCATGTCTAAGTACAGGCCTCACTAAGGTGAAACCGCGAATGGCTCATTAAATCACACATGATTTATTTCGATCATAAAATCCTACTT
GGATAACTGTGGTAATTCTAGAGCTAATACACGCAACTAAACTCCAACCTTGCAGGAGGAGTGCATTTATTAGAACAAAACCAATCGGC
TTCGGCCGTTACTTGGTGAATCTGAATAACTCAGTTGATCGCACGGTCTTTGTACTGGCGACATATCTTTCAAGTGTCTGCCTTATCAA
CTTTTCGATGGTAGTTTATACGACTACCATGGTTGTTACGGGTAACGGAGAATTAGGGTTCGACTCCGGAGAGGGAGCCTGAGAAATGGC
TACCACA
>HE2_SSU637072
ATGCATGTCCAAGTACAAGCCTCATTAAGGTGAAACCGCGAATGGCTCATTAAATCACACCTAATGCACTGGACGTTGCCAGTTACTTG
GATAACTGTGGTAATTCTAGAGCTAATACACGCATCAAAGCTTCGACCTTGCAGGAGGAGCGCATTTATTAGAACAAAACCAATCGGAC
TTCGGTCCGTCATTTGGTGAATCTGAATAACTTTGCTGATCGCACGGTCTCGTACCGGCGACGTATCTTTCAAATGTCTGCCTTATCA
ACTTTTCGATGGTAGTTTATGCGCCTACCATGGTTGTAACGGGTAACGGAGAATCAGGGTTCGACTCCGGAGAGGGAGCCTGAGAAACGG
CTACCACT
>HE2_SSU637135
ATGCATGTCCAAGTACAAGCCTCATTAAGGTGAAACCGCGAATGGCTCATTAAATCACACCTAATGCTCTGGATAGTGTGAGTTACTTG
GATAACTGCGGTAATTCTGGAGCTAATACACGCAATCAAGCCCAACCTGACGGACGGGGCGCATTTATTAGAACAAAACCAATGGCT
TCGGCCATAAATTTGGTGAATCTGAATAACTACGCTGATCGCATGGTCTCGTACCGGCGACGTATCCTTCAAAGTGTCTGCCTTATCAACT
TTTCGATGGTAGTCTATAAGCCTACCATGGTTGTAACGGGTAACGGAGAATAAGGGTTCGACTCCGGAGAGGGAGCCTGAGAAACGGCTA
CCACT
>HE2_SSU644966
ATGCATGTCTAAGCAAAAGCCCAATATGGTGAAGCCGCGAACAGCTCATTACAACAGCCATAGTTTATTGGATCTTATCTTATACTTG
GATACCTGTACTAATTGTAGAGCTAATACATGCAAAAAAGCCACACTCTCTGGGTGTGGTGCATTTATTAGAACAAAACCAATCGGCTT
CGGCCGTTGTTTTGGTGAATCTGAATAACTCAGCTGATCGCACAGTCTAGCACTGGCGATGTATCTTTCAAGTGTCTGCCTTATCAACTT
TCGATGGTAGTTTACATGACTACCATGGTTGTAACGGGTAACGGAGAATAAGGGTTCGACTCCGGAGAGGGAGCCTGAGAAATGGCTAC
CACA
>HE2_SSU654005
ATGCATTGTCTAAGCAGAAGCCGATTAATGGTAAAGCCGCGAATGGCTCATTACAACAGCTATTGTTTATTGGACTATCATCCTACTT
TGGATAACTGTGGCAATTCTAGAGCTAATACACGCAGCAAAACGGGGACCTTACGGAACTGTGCATTTATTAGAACAAAACCAATCGG
GTTTTACCCGTCGTTTGGTGAATCTAGGTAACCTGCTAATCGCATGGTCTAAGAACCAGGCGATATATCTTTCAAATGTCTGCCTTATC
AACTTTTCGATGGTAGTTTATGCGCCTACCATGGTTGTAACGGGTAACGGAGAATCAGGGTTCGACTCCGGAGAGGGAGCCTGAGAAACG
GCTACCACA
```

>HE2\_SSU655107  
ATGCATGTCTAAGCACAACCTTTATGAGTGAAGCCGCGAAAAGCTCATTACAACAGCCGTCGTTTCTTGGATCTCCGAATTTACTTGGATAACTGTGGTAATTCTAGAGCTAATACATGCAATCGAGCCCTGAACGTAAGTGAATGGGCGCATTATTAGTAACAAAACCGATCGGTGTATGCACCGTACGTTTGGTGAATCTGAATAACTGAGCAGATCGCTTGGTCTTTGCACCGCGACGTATCTTTCAAATGTCTGCCCTATCAACTTTTCGATGGTACGTGATATGCCTACCATGGTTGTAACGGGTAACGGGGAATCAGGGTTCGATTCGGGAGAGGGAGCATGAGAAACGGCTACCACA

>HE2\_SSU659506  
ATGCATGTCTAAGCATAAGCCGAATATGGTAAAGCCGCGAATGGCTCATTACAACAGCCATAGTTTATTGGATCTGAATATCCTACTTGGATACCTGTGGTAATTCTAGAGCTAATACACGCAAAAAGCCCTGACTTTACGGAAAGGGCGCATTATTATAACAAGACCAATTGGCTTCGGCCATCCATTGGTGAATCTGAATAACTACGACGATCGCACGGTCTCGTACC GGCGACATATCCTTCAAGTGTCTGCCTTATCAACTGTGCATGGTAGTTTACATGACTACCATGGTTGTAACGGGTAACGGAGAATTAGGGTTCGACTCCGGAGAGGGAGCCTGAGAAACGGCTACCACA

>HE3\_SSU110275  
ATGCATGTCTAAGTACATACTGATAAATAGTGAAGCTGTGAATGGCTCATTACAACAGCCGATAGTTTATTGGATCTTCTCTCATACTTGGATACCTGTGGTAACCTAAGAGCTAATACGCGCAATTAAGTCCAGACCTTAGGGGACGGACGCGGTTATTAGACCAAAAACCAATCGGGCTGTGTCGGGTATTTTGGTGAATCTGAATAACTCTGCAGATCGCACGGTCTCGCACCGGCGACATGTCATTCAAATGTCTGCCTTATCAACTTTTCGATGGTAGTTTATGCGCCTACCATGGTTGTAACGGGTAACGGAGAATTAGGGTTCGACTCCGGAGAGGGAGCCTGAGAAACGGCTACCACA

>HE3\_SSU117415  
ATGCATGTCTAAGCATAAGCCGATTAATGGTGAAGCCGCGAATAGCTCATTACAACAGCCATAGTTTATTGGATCTTCTCTCATACTTGGATACCTGTGGTAATTCTAGAGCTAATACACGCAAAAACCCCTGACTTCGGAAGGGGTGCATTTATTAGAACAAAACCAATTGGCTTCGGCCATTCATTGGTGAATCTGGATAACTTTGGGCTGATCGCACGGTCTAGCACCGGCGACGTATCTTCAAATGTCTGCCTATCAAATGTCGAAGGAGGTGATATGCCCTCCCTTGTTTTTAACGGGTAACGGGGAATCAGGGTTCGATTCCGGAGAGGGAGCATGAGAAACGGCTACCACA

>HE3\_SSU118424  
ATGCATGTGTAAGCATGAATCACTTAATGGTGAAGCCGCGAATGGCTCATTATAACAGCCATAGTTTATTAGATTTTTTTTTTACTTGGATAACTGTGGTAATTCTAGAGCTAATACACGCGACAAAGCTTCGACCTTACGGAAGGAGCGCATTTATTAGATCAAAAACCAATCAGCTCCGGCTGTATCCTTGACGAATCTGAATAACTTTCCGCTGATCGCATGGCTTCACGCCGGCGACGTATCTTTCTAAGGTGTGCCCTATCAACTGTGCATGTGGCATAGACGCCACAGTGGTTTTGACGGGTAACGGGGAATCAGGGTTCGATTCCGGAGAGGGAGCATGAGAAACGGCTACCACA

>HE3\_SSU124287  
ATGCATGTCTCAGTACATACTGATTAATAGTGAACCCGCAATGGCTCATTACAACAGCTATAGTTTATTAGATCTTACTCTACATGGATACCTGTGGTAACCTAAGAGCTAATACATGCAACAAAGCCCTATTGACAGGGCGCATTTATTAGGACAAAACCAATCGGGCTTGCCCCGTATTGGTGGATCTGAATAACTTTGCTAATCGCACAGTCTCGTACTGGCGATGTATCTTTCAAATATCTGCCTTATCAACTGTGCATGGTAGCTTACACGACTACCATGGTTGTACGGGTAACGGAGAATTAGGGTTCGACTCCGGAGAGGGAGCCTGAGAAACGGCTACCACA

>HE3\_SSU124928  
ATGCATGTCCAAGTACAAGCCTCATTAAGGTGAAACCCGCGAATGGCTCATTAAATCACACCTAATGCACTGGACGTTGCCAGTTACTTGGATAACTGTGGTAATTCTAGAGCTAATACATGCTGCAAGCTCTGACAAGTCTTGGACTTGAAGGAGTGCATTTATTAGTACAAAACCAATCGGGCTTCGCTGCAAATTTGGTGAATCTGAATAACTCAGCTGATCGCACAGTCTTGAAGTGGGACGTATCTTCAAAGTGTCTGCCGTATCAACTGTTGATGGTAGTTTATGTGACTACCATGGTTGTAACGGGTAACGGAGAATAAGGGTTCGACTCCGGAGAGGGAGCCTGAGAAACGGCTACCACA

>HE4\_SSU913283  
ATGCATGTCTAAGCACAACCCGAATATGGTAAAGCCGCGCATTGCTCATTACAACAGCCATTGTTTACTGGATCTTGAAGGTTACTTGGATAACTGTGGTAATTCTAGAGCTAATACACGCAAAAACCTTAGCCGCTGGCAAGAGTGCATTTATTAGAACAAAACCAATCAGGCTTCGGTCTGCTGTTTGGTGAATCTGAATAACTGAGCTGATCGTACC GGCTTCGACCGGCGACGTATCTTTCAAAGTGTCTGCCTTATCAACTTTTCGATGGTAGCTTATGTGGCTACCATGGTTGTAACGGGTAACGGAGAATCAGGGTTCGACTCCGGAGAGGGAGCCTGAGAAATGGCTACCACA

>HE5\_SSU181724  
ATGCATGTCCAAGTACAAGCCTCATTAAGGTGAAACCCGCGAATGGCTCATTAAATCACACCTAATGCACTGGACGTTGCCAGTTACTTGGATAACTGCGGTAATTCTAGAGCTAATACACGCAATTCAGCCCTGACCTCACGGGAGGGGAGCATTTATTAGAACAAAACCAATTTGGCTTCGGCCATCTGTTGGTGAATCTGAATAACTACGACGATCGCATGGTCTCGTACC GGCGACGTATCCTTCAAAGGTCTGCCTTATCAACTTTCGATGGTAGTATTTGCCTACCATGGTTGTAACGGGTAACGGAGAATAAGGGTTCGACTCCGGAGAGGGAGCCTGAGAAACGGCTACCACA

>HE5\_SSU188855  
ATGCATGTCTAAGCACAAGCTATTAATTTGTAAGCCGCGAATGGCTCATTATAACAGCCATTGTTTACAGGATATATTTACTACATGGATAACTGTGGTAATTCTACAGCTAATACACGCAATCAAAAACCCGACTTCGTGAAGGGGTGCGTTTGTACTTCAAATCAATCGGACTTCGGTCCGCACTCAAGTGAATTTGAACAATTCAGCTGATCGAACGGTCTAAGAACCAGACATATCCTTCAAACGCTGCCTTATCAACTTTTCGACGTGTCTATGCGACAAAACGTGGTCTGACGGGTAACGGAGAATCAGGGTTCGACTCCGGAGAGGGAGCCTGAGAAACGGCTACCACA

>HE6\_SSU355777  
ATGCATGTCTAAGCATAAGCCAAAAAATGGTGAAGCCGCGAATAGCTCATTACAACAGCCATAGTTTATTAGATCTACCAATCCTACTTGGATAACTTTAGTAATTCTAGAGCTAATACACGCAATCAAGCTCAACCTCTGGGCGGAGCGCATTATTAGAACAAAACCAATCGGGTCCGCCCCGTCATTTGGTGAATCTGAATAACTCAGCCGATCGCATGGTCTCGTACC GGCGACGTATCTTTCAAAGTGTCTGCCTTATCAACTTTTCGATGGTAGTTTACACGCTACCATGGTTGTAACGGGTAACGGAGAATAAGGGTTCGACTCCGGAGAGGGAGCCTGAGAAACGGCTACCACA

>HE6\_SSU358048  
ATGCATGTGTAAGTACAGACTGTACAACGGTGAAGCTGCGAATGGCTCATTAAATCAGTTATGGTTCCTTAGATATTAATAAATCTACATGGATAACTGTGGTAATTCTAGAGCTAATACACGCAATCAAGCCCCAACCTGACGGGCGGGGCGCATTATTAGAACAAAACCAATTTGGCTTCGGCCATTCATTGGTGAATCTGAATAACTACGCTGATCGCACGGTCTCGCACCGGCGACGTATCCTTCAAAGTGTCTGCCTTATCAACTTTTCGATGGTAGTTTACATGACTACCATGGTTGTAACGGGTAACGGAGAATAAGGGTTCGACTCCGGAGAGGGAGCCTGAGAAACGGCTACCACA

>HE6\_SSU360897  
ATGCATGTCTAAGCATGAACCGAATATGGTGAAGCCGCGAATGGCTCATTACAACAGCCGTTGTTTCTTGGAGCTTGATTTACTTGGAT  
AACTGTGGTAATTCTAGAGCTAATACATGCAACCAAGCTCTGACCTTTGGAAGGAGCGCGTTTATTAGACCAAGACCAATCAGACTTTG  
TCTGGAATCTGGTGACTCTGAATAACTTTGCTGATCACACAGTCTCTACTGGTGACATATCTTTCAAGTGTCTGCCCTATCAACTGT  
CGACTGTGGCATAGACGCCACAGTGGTTTTGACGGGTAACGGGGAATCAGGGTTCGATTCCGGAGAGGGAGCATGAGAAACGGCTACC  
TCA

>HE6\_SSU361449  
ATGCATGTGTAAGCACAAGCCTTATATGGTGAAGCCGCGAATGGCTCATTACAACAGCCATAGTTTATTAGATCTTATCCTATTACATG  
GATAACTGTGGTAATTCTAGAGCTAATACAGCAATCAAGCTCAGACCTTACCGAATGAGCGCATTATTAGAACAAAACCAATCGGAC  
TTCGGTCCGCTCTTTGGTGAATCTGAATACCTTAGCAGATCGCACGGTCTTTGAACCGGCGACATATCTTTCAAATGTCTGCCTTATCA  
ACTTTTCGTTGGTAGTTTATGCGCCTACCATGGTTGTAACGGGTAACGGAGAATAAGGGTTCGACTCCGGAGAGGGAGCCTGAGAAACGG  
CTACCACA

>HE6\_SSU365256  
ATGCATGTCCAAGTACAAGCTCGTCCCAGCGAAAAGTGGGATGGCTCATTAAATCAGTTATGGTTCATTGGATCGAGTACCCCCGAC  
ATGGATAACTGTGGTAATTCTAGAGCTAATACATGCAACCAAGGTCTGACCTTTGGAAGGAGCGCGTTTATTAGACCAAGACCAATCAG  
ACTTTGTCTGGAACTCTGGTGACTGACTAACTTTGCTGATCACACAGTCTCTCGACTGGTGACATACTTTTCAAGTGTCTGCCCTATCAA  
CTTTTCGATGGTAGTTTATGTGCCTACCATGGTGGTAACAGGTAACAGAGAATAAGGGTTCGACTCCGGAGAGGGAGCCTGAGAAATGGT  
TACCACA

>HE6\_SSU368318  
ATGCATGTGTAAGTACAGACTGTACAACGGTGAAGTGGGATGGCTCATTAGATCAGTTATGGTTCCTTAGATCGTACAATCCTACTT  
GGATAACTGTGGTAATTCTAGAGCTAATACATGCAACCGAGCTCCGACCTCAGGGAAGGAGCGCATTTATTAGACCAAGACCAATCAGG  
CTCTGCCTGTCTGTGGTACTCTGAATAACTTTGCTGATCACATGGTCTTAGTACCGGTGACATATCTTTCAAGTGTCTGCCCTATCA  
ACTTTTCGATGGTAGTTTATGTGCCTACCATGGTGGTAACGGGTAACGGAGAATAAGGGTTCGACTCCGGAGAGGGAGCCTGAGAAATGG  
CTACCACA

>HE6\_SSU370544  
ATGCATGTCTAAGCATAAACCAGAACTAAAGTGAAGCCGCGAATAGCTCATTACAACAGCCGTTGTTTCTTGGATCTCCGCAATACCTGG  
ATAACTGAGGTAATTCTTGGAGCTAATACACGCAATCGAGCTCCGACCTTCGGGACGAGCGCATTTATTAGAACAAAACCAATCGGTGCT  
TGCATGTGGTTTGGTGAATCTGAATAACTGAGCAGATCGCTTCGGTCTCGTACCGGCGATGTATCCTTCAAGTGTCTGCCTTATCAAC  
TTTCGATGGTAGTTTATGTGCCTACCATGGTGGTAACGGGTAACGGGGAATCAGGGTTCGATTCTCGAGAGGGAGCATGAGAAACGGCT  
GCCACA

>HE6\_SSU378839  
ATGCACGTTTTAAATATAGGCCGCTTTAAGGTGAAATCGCGAATAGCTCATTACAACAGCCATGTTTCTTGGATCTTGCTTTCTACTT  
GGATAACTGTGGTAATTTAGGAGCTAATACATGCAACAAAAACCGATGCAAGAGGAACACATGTATTAGAGTTAAACCAGTCCGGTAA  
TCTGAATAACTCAGCAGAGCAGATGGGCTAGTCTGGTGCATATCTTTCAACTGTTTGTCTTACCCACTTTCTAAGGTATTTGTGTG  
CCTACCATGGTGGTAACGGGTAACGGGAGACTAAGGGTTCGACTCCGGAGAGGGAGCCTGAGAAACGGCTACCACT

>HE6\_SSU383414  
ATGCATGTCTAAGCAGAAGCCGACAAACGGTAAAGCCGCGAATGGCTCATTACAACAGCCGTCGTTTCTTGGATCTCTAATTTTACTTG  
GATAACTGTGGTAATTCTAGAGCTAATACACGCACTAAAGCTCCGACCTTACGGGACGAGCGCATTTATTAGAACAAAACCAATCGCGT  
TTCGGCCCGTTCTGGTGGTACTCTGAATAACTAAGCCGATCGCACGGTCTCGTACCGGCGACGTATCTTTCAAGTGTCTGCCCTATCAA  
ATGTGCAAGGGAGGTGATATGCCCTCCCTTGTTTTTAACGGGTAACGGGGAATCAGGGTTCGATTCCGGAGAGGGAGCATGAGAAACGGC  
TACCACA

>HE6\_SSU383888  
ATGCATGTCTAAGAATAAACCAGAAAATGGTAAGTCTGTGTACGGCTCATTATATCAGCTCAAATTTATTGGATCATATCATCCTACTTG  
GATACCTGTGGTAATTCTAGAGCTAATACACGCAATTCAGCCCTGACCTCACGGGAGGGGAGCATTTATTAGAACAAAACCAATGGCC  
TCGGCCATCTGTGGTGAATCTGAATAACTACGAGATCGCATGGTCTCGTACCGGCGACGTATCCTTCAAGGTCTGCCTTATCAACTT  
TCGATGGTAGTTTATTTGCCCTACCATGGTGGTAACGGGTAACGGAGAATTAGGGTTCGACTCCGGAGAGGGAGCCTGAGAAACGGCTAC  
CACA

>HE7\_SSU232624  
ATGCATGTCTAAGCACAAGCCGATATATGGCAAACCCGCGAATGGCTCATTACAACAGCCACTGTTCACTTGATCTGTACCATATCTAC  
TTGGATAACTGTGGTAATTCTAGAGCTAATACACGCACCCATGCTCCGTCCGTGAGGAACAAGCGCATTTATTAGAACAAAACCAATCG  
ACTTCGGTCTGTTTGTGACTCTGAATAACTTTGCTGATCGCACAGTCAATGTACTGGCGACGCATCTTTCAAGTGTCTGCCTTATC  
AACTTTTCGACAGTAGTTTCTGTGCCTACCGTAGTTGCAACGGGTAACGGAGAATAAGGGTTCGACTCCGGAGAGGGAGCCTGAGAAACG  
GCTACCACA

>HE7\_SSU256492  
ATGCATGTCTAAGCATAAACCAGAATATGGTAAAGCCGCGAATGGCTCATTACAACAGCCATAGTTTATTGGATCTTACTATCCTACTTA  
GATAACTGTGGTAATTCTAGAGCTAATACACGCACTCAAGCCCCAACCTGACGGTAGGGGCGCATTTATTAGAACAAGACCAATGGCC  
TCGGCCATCTATTGGTGAATCTGAATAACTACGCTGATCGCACACTCTCGCAGTGGCGACGTATCCTTCAAGTGTCTGCCTTATCAACT  
TTCGATGGTAGTTTATATGACTACCATGGTGGTAACGGGTAACGGAGAATAAGGGTTCGACTCCGGAGAGGGAGCCTGAGAAACGGCTA  
CCACA

>HE8\_SSU829972  
ATGCATGTGTAAGCACAAGCCAAATGAATGGTAAAGCTGCGAATGGCTCATTACAACAGCCACTGTTCAATTTGATCTTAATCCATTACTT  
GGATACCTGTTCTAATTTAAGAGCTAATACATGCAACTAAGTCCCAACCGCAAGGGCGGGATGCATTTATTAGACCAAAAACCAATCGGG  
CTTGGCCGAGGTTTGGTACTCTGAATAAATTTGCTGACCGCACGGTCTCGCACCGGCGCGCATCTTTCAAATGTCTGCCTTATCAAC  
TTTCGATGGTAGTTTATGCGCCTACCATGGTGGTAACGGGTAACGGAGAATAAGGGTTCGACTCCGGAGAGGGAGCCTGAGAAACGGCTA  
ACCACA

>HE8\_SSU843570  
ATGCATGTCCAAGTACAAGCCTCATTAAAGGTGAAACCGCGAATGGCTCATTAAATCACACCTAATGCACTGGACGTTGCCAGTTACTTG  
GATACCTGTGGTAATTCTAGAGCTAATACACGCAATCAAGCCCTGACCTTACGGGAAGGGCGCATTTATTAGAACAAGACCAATGGCT  
TCGGCCATTTATTGTTGAATCTGAATAACTACGAGATCGCACGGTCTCGCACCGGCGACATATCCTTCAAGTGTCTGCCTTATCAACT  
GTGATGGTAGTTTACATGACTACCATGGTGGTAACGGGTAACGGAGAATAAGGGTTCGACTCCGGAGAGGGAGCCTGAGAAACGGCTA  
CCACA

>HE9\_SSU305678  
ATGCATGTCTAAGCAAACCTTTATGAGTGAAGCCGCGAAAAGCTCATTACAACAGCCGTCGTTTCTTGGATATCCGAATTTACTTGGATAACTGTGGTAATTCTAGAGCTAATACATGCAATCGAGCCCTGAACGTAAGTGAATGGGCGCATTTATTAGTAACAAAACCGATCGGTGTATGCACCGTACGTTTGGTGAATCTGAATAATTGAGCAGATCGCTTGGTCTTGTACCGGCGACGTATCTTTCAAGTGTCTGTTTTATCAACTTTAGATGTAGTTTATATGACTAACATGGTTGTCACGGATAACGGAGAATAAGGGTTCGACTCCGGAGAGGGAGCCTGAGAAACGGTACCCT

>HF1\_SSU759758  
ATGCAAGTGTGACGTCAGCCATATTATGGTTAAGCCGCGAAAAGCTCATTACAACAGCCATTGTTCACTTGTATCTTACTATCCTACTTGGATAACTGTGGTAATTCTAGAGCTAATACGTCGAACAATGCTCAGGTAGTCTTTCGGGGCGACGCGCAGTTATTAGAACAAAACCAATCGGGCTTTCGGTCCGTCGGTTCGGTGGATCTGAATAACTACAGCTGATCGCACAGTCTTCGTAAGTGTCTGTTTTCAAGTGTCTGTTTTATCAGTGTGATGTTAGTCTACGTGGTACCATGGCTGTAACGGGTAAACGGAGAATAAGGGTTCGACTCCGGAGAGGGAGCCTGAGAAACGGTACCACA

>HF1\_SSU763392  
ATGCATGTCTAAGTACAAGCCGAGTTAAGGTGAAAACCGCGAATGGCTCATTAAATCACACCTAATATACTGGATAGTGTGAGCTACTTGGATACCTGTGGTAATTCTAGAGCTAATACACGCGAAACCAAGCTTACTTCCGGAGGGGCGCATTTATTAGAACAAAACCAATCGGGCTTCCCGTCAATTTGGTGAATCTGAATAACTCAGTTGATCGCACAGTCTCGACTGGCGACGTATCTTTCAAGTGTCTGCCTTATCAACTTCGATGGTAGTTTACATGACTACCATGGTTGTAACGGGTAAACGGAGAATAAGGGTTCGACTCCGGAGAGGGAGCCTGAGAAATGGCTACCACA

>HF1\_SSU764346  
ATGCATGTCTAAGCAAAGCCCTCAAATGGTGAAGCCGCGAATAGCTCATTACAACAGCCATAGTTTATTGGATCTTCTCTCATACTTGGATACCTGTGGTAATTCTAGAGCTAATACACGCGAAACCAACTCTGAGCTCTGGCGAGGAGTGCATTTATTAGAACAAAACCAATGGACCCTCGTCTTGGTGAATCTGAATAACTCAGTTGATCGCACAGTCTAGACTGGCGACGTATCTTTCAAGTGTCTGCCTTATCAACTTCGATGGTAGTTTATATGACTACCATGGTTGTAACGGGTAAACGGAGAATAAGGGTTCGACTCCGGAGAGGGAGCCTGAGAAATGGCTACCACA

>HF1\_SSU774294  
ATGCATGTCTAAGCACACGCCTTAAATGGTAAAGCCGCGAATGGCTCGGTATAACAGCTACGGTTTATTAGATATTAGTTGTTTTACTTGGATAACTGTGGTAATTCTAGAGCTAATACATGCACTTTAGCTCGGACCTCACGGAAAAGAGCGCATTTATTAGATCAAACCAATCGGGCTCGGTCCGTTGGTGAATCTGAATAACTCAGTTGATCGCACAGTCTTGTACTGGCGACGTATCTTTCAAGTGTCTGCCTTATCAACTTTTCGATGGTAGTTTATACGCCTACCATGGTTATAACGGGTAAACGGAGAATAAGGGTTCGACTCCGGAGAGGGAGCCTGAGAAATGGCTACCACA

>HF1\_SSU779114  
ATGCATGTCTATGCATAAGCCTAAATAAGGTGAAGTTCGCGAATGGCTCATTACAACAGCCATTGTTTACTGGATCTTAATATCCTACTTGGATAACTGTGGTAATTCTAGAGCTAATACACGCGAACCAAGCTCTGACCGCAAGGGATGAGCGCATTTATTAGAACAAAACCAATCGGGTTCGTCCTTGGTGAATCTGAATAACTCAGCTGATCGCATGGTCTCGCACCGGCGACGTATCTTTCAAGTGTCTGCCTTATCAACTTTGATGGTAGTTTATGCGACTACCATGGTTGTAACGGGTAAACGGAGAATAAGGGTTCGACTCCGGAGAGGGAGCCTGAGAAACGGCTACCACA

>HF1\_SSU780927  
ATGCATGTGTAAGTACAAACCTGTACATGGTGAAGTACGAATGGCTCATTAAATCAGTTGTGGTTCCTTAGATCGTTTTACAGTTTGGATAACTGTAGTAATTCTAGAGCTAATACACGCGAACCAAGCTCTGACCTCTCGGGGAAAGAGTGCATTTATTAGAACAAAACCAATCGGGCTTCGGTCTGTCAATTGGTGAATCTGAATAACTCAGCTGATCGCACGGTCTTGTACCGGTGACGCATCTTTCAAGTGTCTGCCTTATCAAATGTTGATGGTAGTTTATGCGACTACCATGGTTGTAACGGGTAAACGGAGAATAAGGGTTCGACTCCGGAGAGGGAGCCTGAGAAACGGCTACCACA

>HF2\_SSU192072  
ATGCATGTGTAAGAATAAACCGAATATGGTAAATCCGCGAATGGCTCATTATTCAGCCACAAATCATTGGATCTAATCAGTTACTTGGATAACTGTTCAAAAGGAAGAGCTAAGACATGCCCGAAGGCCAAGCGCAAGCTTGGTTCGACTTCTTAGAAAAGACCAATTGGCCTCGGCCATCCATTGGTGAATCTTCCGAAAGAGCAGATCGCACGGTCTAGTACCGGCGACATATCCTTCAATGTGTCTGCCTTATCAACTGTGATGGTAGTTTATTGGACTACCATGGTTGTAACGGGTAAACGGAGAATAAGGGTTCGACTCCGGAGAGGGAGCCTGAGATACGGCTACCACA

>HF2\_SSU204352  
ATGCATGTCTAAGTACAGGCCTCACTAAGGTGAAAACCGCGAATGGCTCATTAAATCACACCTAATATACTGGATAGTATCAGTTACTTGGATAACTGCGGTAATTCTAGAGCTAATACACGCGAACCCATGCTCCGTCCGTGAGGAACGAGTGCATTTATTAGAACAAAACCAATCGACTTCGGTTCGTTTGTGACTCTGAATAACTTTGCTGATCGCACAGTATTGTACTGGCGACGCATCTTTCAAGTGTCTGCCTTATCAACTTTTCGACGGTAGTTTCTGTGCTACCCTGGTTGCAACGGGTAAACGGAGAATAAGGGTTCGACTCCGGAGAGGGAGCCTGAGAAACGGCTACCACA

>HF2\_SSU205129  
ATGCATGTCTAAGTACAGGCCTCACTAAGGTGAAAACCGCGAATGGCTCATTAAATCACACCTAATATACTGGATAGTATCAGTTACTTGGATAACTGCGGTAATTCTAGAGCTAATACACGCGACTCAAGCCCAACCTGACGGTAGGGGCGCATTTATTAGAACAAGACCAATTGGCCTCGGCCATCTATTGGTGAATCTGAATAACTACGCTGATCGCACACTCTCGCAGTGGCGACGTATCCTTCAAGTGTCTGCCTTATCAACTTTTCGATGGTAGTTTATATGACTACCATGGTTGTAACGGGTAAACGGAGAATAAGGGTTCGACTCCGGAGAGGGAGCCTGAGAAACGGCTACCACA

>HF2\_SSU208147  
ATGCATGTCTATGCACGAGCCGAAAATGGTGAAGCCGCGAATGGCTCATTACAACAGCCCTTGGTTTTATTGGATCTATTATATCCACTTGGATAACTGTGGTAATTCTAGAGCTAATACACGCGAACTAAATCCTGCGGAAAGAGTGCATTTATTAGAACAAAACCAATCGGGCTTCGGCCGTTACTTGGTGAATCTGAATAACTCAGTTGATCGCACGGTCTTTGTACTGGCGACATATCTTTCAAGTGTCTGCCTTATCAACTTTTCGATGGTAGTTTATGACGACTACCATGGTTGTAACGGGTAAACGGAGAATAAGGGTTCGACTCCGGAGAGGGAGCCTGAGAAATGGCTACCACA

>HF2\_SSU210357  
ATGCATGTCTAAGCAAACCTATTTAATTGTGAAGCCGCGAATGGCTCATTATAACAGCCATTGTTTACTGGATATATTTTTACTACATGGATAACTGTGGTAATTCTAGAGCTAATACACGCGAACCAACTTGAAGGGGTGCGTTTGGTACTTCAAACCAATCAGGCTTCGGTCTGAATTCAGTATTTGAACAATTTAGCTGATCGAACGGTCTATGAACCGACGACATATCCTTCAAACGCTGCCTTATCAAATTTTCGATGGTAGCTTACGCTACCATGGTTGTAACGGGTAAACGGAGAATAAGGGTTCGACTCCGGAGAGGGAGCCTGAGAAATGGCTACCACA

>HF3\_SSU989895  
ATGCĀAGTGTCAAGCTCAAGCCTATGTATGGTTAAGCCGCGAATGGCTCATTACAACAGCCACTGTTTACTTGTCTTGATAATCCTACT  
TGGATAACTGTGGTAATTCTAGAGCTAATACATGCAACTATGCTCCGACCTTACGGGACGAGCGCAACTATTAGAACCAAACCAATCGG  
GTTTTCGGCCCGTTTCGGTGGTGAATCTGAATAACTGTTTGTCTGATCGCACGGTCTTTGCACCGGCGACGCATCTTTCAAGTGTCTGCCTT  
ATCAACTTTTCGATGGTAGTTTATGTGCCTACCATGGTTGTAACGGGTAACGGGAGAATAAGGGTTCGACTCCGGAGAGGGAGCCTGAGAA  
ACGGCTACCACA

>HF3\_SSU990962  
ATGCATGTCTATGCATAAACCGAATATGGTAAAGCCGCGCATGGCTCATTACAACAGCCATAGTTTATAGGATCTTACTATCCTACTTT  
GATAACTGTGGTAATTCTAGAGCTAATACACGCCTCAAGCCCCAACCTGACGGTAGGGGCGCATTATTAGAACAAGACCAATTGGCT  
TCGGCCATCTATTGGTGAATCTGAATAACTACGCTGATCGCACACTCTCGAAGTGGCGACGTATCCTTCAAGGTGTGCCCTATCAACT  
GTCGACTGTGGCATAGACGCCACAGTGGTTTGTACGGGTAACGGGGAATCAGGGTTCGATTCCGGAGAGGGAGCCAGAGAAACGGCTA  
CCACA

>HF4\_SSU606153  
ATGCATGTCTAAGCATAAGCCGAATATGGTAAAGCCGCGAATGGCTCATTACAACAGCCATAGTTTATTGGATCTTAGAGTCTACTTTG  
GATACTGTGGTAATTCTAGAGCTAATACACGCATTCAAGCCCCAACCTGACGGGCGGGGCGCATTATTAGAACAACCAATTTGGCT  
TCGGCCATCTATTGGTGAATCTGAATAACTACGCTGATCGCACACTCTCGAAGTGGCGACGTATCCTTCAAGGTGTGCCCTATCAACT  
TTCGATGGTAGTTTACATGACTACCATGGTTGTAACGGGTAACGGGAGAATAAGGGTTCGACTCCGGAGAGGGAGCCTGAGAAACGGCTA  
CCACA

>HF4\_SSU614317  
ATGCATGTCTAAGTACATACCTTACACGGTGAAGTGCGAATGGCTCATTAAATCAGTTATGGTTCCTTAGATCGATACACTCCTACT  
TGGATAACTGTGGCAATTCTAGAGCTAATACACGCCTAAAGTCCGACCTTACGGGACGAGCGCATTATTAGAACAACCAATCGG  
GTTTTCGGCCCGTTTCGTTGGTGAATCTGAATAACTAAGCCGATCGCACGGTCTCGTACCGGCGACGTATCTTTCAAGTGTCTGCCTTATC  
AACTTTCGATGGTAGTTTATGTGCCTACCATGGTTGTAACGGGTAACGGGAGAATAAGGGTTCGACTCCGGAGAGGGAGCCTGAGAAACG  
GCTACCACA

>HF4\_SSU619471  
ATGCACGTTCTAATATGAGCATTAAAAATGTGAAATCGCGAATAGCTCATTACAACAGCCATTGTTTCTTGGATCTTATATTCCTACTT  
GGATAACTGTGGTAATTCTAGAGCTAATACATGCAATGAAGTTCCAACGCAAGAGGAATGCATTTATTAGAGCTAAACCAATCAGGGGC  
AACCATGTTTGTGGTGAATCTGAATAACTTAGCAGAGCACATGGGCTAGTCTTGGTGCATATCTTTCAAGTGTCTGCCTTATCAAC  
TTCGATGGTAGTTTATGTGCCTACCATGGTTGTAACGGGTAACGGGAGAATAAGGGTTCGACTCCGGAGAGGGAGCCTGAGAAACGGCT  
ACCACA

>HF4\_SSU620879  
ATGCATGTGTAAGTACAGACTGTACAACGGTGAAGTGCGAATGGCTCATTAGATCAGTTATGGTTCCTTAGATCGTACAATCCTACTT  
GGATAACTGTGGCAATTCTAGAGCTAATACACGCCTCAATCCCTGACTTCGGAAAGGGAGCATTATTAGAACAAGACCAATTGGCTT  
CGGCCATCTATTGGTGAATCTGAATAACTACGCAGATCGCACAGGCTCGTCTGGCGACATATCCTTCAAGTGTCTGCCTTATCAACTG  
TCGATGGTAGTTTATTGGACTACCATGGTTGTAACGGGTAACGGGAGAATAAGGGTTCGACTCCGGAGAGGGAGCCTGAGAAACGGCTAC  
CACA

>HF4\_SSU622464  
ATGCATGTCTATGCACAAGCCGAAAATGGTGAAGCCGCGAATGGCTCATTACAACAGCCACTGTTTACTTGTCTTATTATCCTACTT  
GGATAACTGTGGTAATTCTAGAGCTAATACATGCCAAGATGCTCCGACCTTACGGGACGAGCGCATTATTAGACCAAGACCAATCGGG  
CTTCGGCTCGTAGTCTGGTGAATCTGAATAACTCTGCCGATCGCACGGTCTTTGTACCGGCGACGCATCTTTCAAGTGTCTGCCTTATC  
AACTTTCGATGGTAGTTTCTGTGCCTACCATGGTTGTAACGGGTAACGGGAGAATAAGGGTTCGACTCCGGAGAGGGAGCCTGAGAAACG  
GCTACCACA

>HF4\_SSU624085  
ATGCATGTCTAAGTACAAGCCTCATTAAGGTGAAACCGCGAATGGCTCATTAAATCACACCTAATATACTGGATAGTATCAGTTACTTG  
GATAACTGCGGTAATTCTGGAGCTAATACATGCGTTCAAGCCCCAACCTTGGCTGCGGGGCGCTTTTATTAGACCAAGACCAATCAGGC  
ATTGCCTGGAATCTGGTGAATCTGAATAACTTGTCTGATCACATGGTCTTAGCACCAGGTGACATATCTTTCAAGTGTCTGCCCTATCAA  
CTTTCGATGGTAGTTTATGTGCCTACCATGGTGGTAACGGGTAACGGGAGAATAAGGGTTCGACTCCGGAGAGGGAGCCTGAGAAATGGC  
TACCACA

>HF4\_SSU625424  
ATGCATGTCTATGCAGAAGCCGAACTATCGCAAAGCTGCAATGGCTCATTACAACAACCTTTTGTCTTCTTGGATCTCTCTGATCTACTT  
GGATACCTGTGGTAATTCTAGAGCTAATACACGCACCAAATCTCTGACCTTTGGGGATGAGTGCATTTATTAGAACAACCAATCAATCGGG  
CTCTGCTCGTATGATGGTGAATCTGAATAACTACGCTGATCGCATGGTCTCATACTGGCGACGTATCTTCAAGTATCTGCCTTATCAA  
CTGTTGATGGTAGTTTATTTGCCTACCATGGTTGTAATGGGTAATGGGAGAATAAGGGTTCGACTCCAGAGAGGGAGCCCGGGAAACGGC  
TACCACA

>HF4\_SSU628562  
ATGCATGTCTAAGCATAGCCGTACTATGGTGAAGCCGCGAAGCTCATTACAATAGCCGTTGTTTCTTGGATCTCCAAACACTACAT  
GGATAACTGTGGTAATTCTAGAGCTAATACATGCGTACATGCGTCAACTGGTGAAGCCGGGAGACGTGCATTTATTGGATCAGAACCA  
TCCGGCCTTCGGGCCGTACTCTGGTGAATCTAAATAACTGAGCGGAGCACACGCTCTTGCAGCGGTGCCAGTTCGTTCAAGTGTCTACC  
CTATCAACTTGCATGGTAAATTACAAGCTTACCATGGTGGTAACGGGTAACGGGAGAATAAGGGTTCGATACCGGAGAGGGAGCCTGAG  
AAATTGCTACCACA

>HF4\_SSU631524  
ATGCATGTCTAAGTACACTTCTTGTATGGAGAACTGCGAATGGCTCATTACAACAGCCACTGTTCACTTGTCTGATTATCCTACTT  
TGGATAACTGTGGTAATTCTAGAGCTAATACACGCACCCATGCTCCGACCTGAGGGGACGAGCGCATTATTAGAACAACCAATCGG  
GCCTCGGCCGTGTTTCGTTTGTGACTCTGAATAACTCTGCTGATCGTACGGTCCCCTACCGACGACGCATCTTTCAAGTGTCTGCCTTAT  
CAACTTTCGATGGTAAGTTCGTGCTTACCATGGTTGTAACGGGTAACGGGAGAATAAGGGTTCGACTCCGGAGAGGGAGCCTGAGAAAC  
GGCTACCACA

>HF4\_SSU632264  
ATGCATGTCTATGCACAAGCCGATTTCGGCGAAGCCGCGAATGGCTCATTACAACAGCTGTGGTTTCTTGGATCTTTCAATCCTACTTGG  
ATAACTGTGGCAATTCTAGAGCTAATACACGCCTGAAACCGCGTCTTGGGCTGCGGTGCATTTATTAGAACAAGCAACCGGGCC  
TTGGCCTGACTGCTTGGCGAATCTGAATAACTTGGCTGATCGCACGGTCTCGCACCGGCGACGCATCTTTCAAGTGTCTGCCTTATCAA  
CTGTCGATGGTAGTTTACGTGCCTACCATGGTTGTAACGGGTAACGGGAGAATAAGGGTTCGACTCCGGAGAGGGAGCCTGAGAAATGGC

TACCACA  
>HF4\_SSU635045  
ATGCATGTGTAAGAATAAACCGAATATGGTAAATCCGCGAATGGCTCATTATTCAGCCTCAATTTATTGGATCTAATCAGTTACTTGGATAACTGTTCAAATGAAGAGCTAAGACATGCCTCGAAAAATCCAGCGCAAGCCGGATTGCACCTTCTTAGAAAAAGACCAATTGGCTTCGGCCATCCATTGGTGAATCTTCTGAAATTCGCAGATCGCACGGTCTAGTACCGGGCGACATACCCTTCAAATGTCTTCTTATCAACTGTCTGATGGTAGTTTATTGGACTACCATGGTTGTAACGGGTAACGGAGAATTAGGGTTTCGACTCCGGAGAGGGAGCCTGAGATACGGCTACCACA  
>HF5\_SSU991188  
ATGCATGTCTAAGCACAACCTATTTTATTTGTGAAGCCGCGAATGGCTCATTACAACAGCCATAGTTCACTGGATATATTCCTTTTACATGGATAACTGAGGTAATTTCTCAGCTAATACACGCTTCAAACCCCGACTTTTTGGAGGGGTGCGTTTGTACTTCAAATCAATCGGGTTTCGGCCCGTTTATAAGTGATATGAACAATTTAGCTGATCGCACGGTCTGAGCACCGGCGACATATCCTTCAAATGTCTGCCTTATCAACTTTTCGATGGTAGATTATGCGCCTACCATGGTTGTTACGGGTAACGGAGAATCAGGGTTTGATTCGGAGAGGGCGCTGAGAGACGGCGCCACA  
>HF5\_SSU995414  
ATGCATGTCTAAGTACAAGCCGAGTTAAGGTGAAACCGCGAATGGCTCATTAAATCACACCTAATATACTGGATAGTGTGAGTTACTTGGATAACTGTGGTAATTTCTAGAGCTAATACAAGCATTCAAGCTCAGACCTTACGGAAATGAGCGCATTATTAGAACAAAACCAATCGGACTTCGGTCCGCTTTGGTGAATCTGAATACTTAGCAGTACGACGGTCTTTGAACCGGCGACATATCTTTCAAATGTCTGCCTTATCAACTTTTCGTTGGTAGTTTATGCGCCTACCATGGTTGTTAACGGGTAACGGAGAATAAGGGTTTCGACTCCGGAGAGGGAGCCTGAGAAACGGCTACCACA  
>HF6\_SSU329881  
ATGCATGTCTAAGCATGAACCGAATATGGTGAAGCCGCGAATGGCTCATTACAACAGCCGTTGTTTCTTGGATCTTGATTTACTTGGATAACTGTGGTAATTTCTAGAGCTAATACATGCAACCAAGCTCTGACCTTGAAGGAGCGCGTTTATTAGACCAAGACCAATCAGACTTTGTCTGGAATCTGGTACTCTGAATAACTTTGCTGATCACACAGTCTCGACTGGTGACATATCTTTCAAGTGTCTGCCCTATCAACTTTCGATGGTAGTTTATGTGCCTACCATGGTGGTAAACGGGTAACGGAGAATAAGGGTTTCGACTCCGGAGAGGGAGCCTGAGAAATGGCTACCACA  
>HF6\_SSU338435  
ATGCATGTCTACGTACAGAGATTTTCTCGAAACCGCGAACGGCTCATTACAACAGCCATAGTTTATTGGATCTACAAATCCTACTTGGATACCTGTGGTAATTTCTAGAGCTAATACACGCAACAGATCCCTGACCTTGCGGAAAGGGGAGCATTATTAGAACAAAACCAATTTGGCTTCGGCCATTAGTTGGTGAATCTGAATAACTACGCGAGCATAACGAGCTCGTCTCGATGCCATATCCTTCAAGTGTCTGCCCTATCAACTGTCGATGGTAGGTGATATGCCTACCATGGTTGCAACGGGTAACGGGGAATCAGGGTTTCGATTCCGGAGAGGGAGCCTGAGAAACGGCTACCACG  
>HF6\_SSU338739  
ATGCATGTCTAAGCACAAGCTGATTTAAAGTGAAGCCGCGAATAGCTCATTACAACAGTCATAGTTTACTTGTATTTGTTTTACTTGGATAACTGTGGTAATTTCTAGAGCTAATACATGCTGCAAGCTCCAACAAGTTCTTTGGACTTGAAGGAGTGCATTTATTAGAACAAAACCAAATCGGGTCTTTGACCTGTCCATTGGTGAATCTGAATAACTCAGCTGATCGCACAGTCTGAAGTGGCGACGTATCTTTCAAGTGTCTGCCCTTATCAACTGTTGATGGTAGTTTATGTGACTACCATGGTTGTAACGGGTAACGGAGAATAAGGGTTTCGACTCCGGAGAGGGAGCCTGAGAAACGGCTACCACA  
>HF7\_SSU385021  
ATGCATGTCTAAGAATAGGGATTTATCCCAAATCCGCGAATGGCTCATTACAACAGCCCTTAGTTTATTGGATCTACAAATCCTACATGGATACCTGTGGTAATTTCTAGAGCTAATACACGCAAGAAAGCCCGACCTTACGGGAGGGGTGCATTTATTAGAACAAAGACCAATTTGGCTTCGGCCATCCATTGGTGAATCTGAATAACCTAGCAGAGCATAACGAGCTCGTCTCGATGCCATATCCTTCAAGTGTCTGCCCTATCAACTGTTGACGGTAGGTTACATGCCTACCCTGGTTGTAACGGGTAACGGAGAATAAGGGTTTCGACTCCGGAGAGGGAGCCTGAGAAACGGCTACCACA  
>HF7\_SSU390110  
ATGCATGTCTAAGCACAAGCTTAAACAAAGTGAAGCCGCGAATAGCTCATTACAACAGCCATTGTTTACTTGTATCTTGAAATCCTACTTGGATAACTGTGGTAATTTCTAGAGCTAATACACGCAACAAGCTCTGACCCCTCGGGAAAGAGTGCATTTATTAGAACAAAACCAATCGGACTTCGGTCTGTCAATTTGGTGAATCTGAATAACTCAGCTGATCGCACGGTCTTTGACCGGTGACGCATCTTTCAAGTGTCTGCCTTATCAACTGTTGATGGTAGTTTATGTGACTACCATGGTTGTAACGGGTAACGGAGAATAAGGGTTTCGACTCCGGAGAGGGAGCCTGAGAAACGGCTACCACA  
>HF7\_SSU398053  
ATGCATGTCTAAGTACAAGCCGAGTTAAGGTGAAACCGCGAATGGCTCATTAAATCACACCTAATATACTGGATAGTGTGAGTTACTTGGATAACTGCGGTAATTTCTAGAGCTAATACATGCAACAATGCTCAGGTAGCCCTTCGGGGTACGAGCGCAATTATTAGAACAAAACCAAATCGGGCTTCGGTCCGTTTCGGTTTTGGTGGATCTGAATAACTATAGCTGATCGCACAGTCTTTGCACCTGGCGACGCATCTTTCAAGTGTCTGTCCATCAGCTGTGATGGTATTTCTATACGATTACCATGGCTGTAACGGGTAACGGAGAATAAGGGTTTCGACTCCGGAGAGGGAGCCTGAGAAACGGCTACCACA  
>HF7\_SSU407024  
ATGCATGTCTAAGCAAAATGGTGAAGCCGCGAATAGCTCATTACAACAGCCATAGTTTATTGGATCTTGACTTCTACTTGGAAATACCTGTGGTAATTTCTAGAGCTAATACATGCAATAAGCTCCAACCTTCGGGCGAGCGCATTATTAGAACAAAACCAATCGGCTTCGGCCGTAGTTTGGTGAATCTGAATAACTCAGCTGATCGCATGGTCTCGCACTGGCGACGTATCTTTCAAGTGTCTGCCTTATCAACTTTCGATGTAGTTTACACGCCATACCATGGTTGTAACGGGTAACGGAGAATAAGGGTTTCGACTCCGGAGAGGGAGCCTGAGAAACGGCTACCACA  
>HF7\_SSU407761  
ATGCATGTCTAAGCACAAGCTTAAATAAAGTGAAGCCGCGAATAGCTCATTACAACAGCCATTGTTCACTTGTATCTTGAAATCCTACTTGGATAACTGTGGTAATTTCTAGAGCTAATACACGCAAAAAGCTCTGACCTTACAGGAAGAGTGCATTTATTAGAACAAAACCAATCGGCTTCGGCCGTGCAATTTGGTGAATCTGAATAACTCAGCCGATTGACGGTCTTTGAACCGGCAACATATCTTTCAAGTGTCTGCCTTATCAACTGTTGATGGTAGTTTATGTGACTACCATGGTTGTAACGGGTAACGGAGAATAAGGGTTTCGACTCCGGAGAGGGAGCCTGAGAAACGGCTACCACA  
>HF7\_SSU409331  
ATGCATGTCTAAGTACAAGCCCATTAAGGTGAAACCGCGAATGGCTCATTAAATCACACCTAATATAATGGATAGTGTCCGTTACTTTGGATAACTGTGGTAATTTCTAGAGCTAATACACGCAACAAGCTTAAACCGTAAGGAAAGAGCGCATTATTAGAACAAAAGCATCCGGCAATTTAGCCGTTACTTGGTGAATCTGAATAACTCTGCTAATCGCACAGTCAAGTACTGGAGATGCATCTTTCAAGTGTCTGCCTTATCAACTTTTCGATGGTAGTTTATATGCCTACCATGGTTATAACGGGTAACGGAGAATAAGGGTTTCGACTCCGGAGAGGGAGCCTGAGAAATGGCTACCACA

>HF8\_SSU795426  
ATGCATGTCTAAGCAGAAGCCGAAAATGGTGAAGCCGCGAATAGCTCATTACAACAGCCCTTAGTTTCTTGGATCTTCAGTTCCTACTTG  
GATAACTGTGGTAATTCTAGAGCTAATACACGCTAACAAAGTCCGGCCTCTGGCTGGGCTGCATTTATTAGACCAAACCAATCGGACT  
CTGGTCCGTGTATGGTGAATCTGAATAACTTTGCTGATCGCACGGTCTCGTACCGGCGACGCGTCTTTCAAGTGTCTGGCTTATCAAC  
TTTCGATGGTAGTTTATACGACTACCATGGTTGTAACGGGTAACGGAGAATAAGGGTTCGACTCCGGAGAGGGAGCCCGAGAAATGGCT  
ACCACA  
>HF9\_SSU14048  
ATGCATGTCCAAGTACAAGCCTCATTAAGGTGAAACCGCGAATGGCTCATTAAATCACACCTAATGCACTGGACGTTGCCAGTTACTTG  
GATAACTGCGTAATTCTGGAGCTAATACACGCATACAAGTCCGACGTAAGAAGGAATGCATTTATTAGAATAAACCAATCGGGCTT  
GCCCGTTGTTTGGTGAATCTGAATAACTCCGCAGATCGCATGGTCTAGCACCGGCGACATATCTTTCAAGTGTCTGCCTTATCAAATGT  
CGAAGGGACGTGATATGCCTCCCTTGTGTTGTAACGGGTAACGGGGAATCAGGGTTCGATTCCGGAGAGGGAGCATGAGAAACGGCTACC  
ACA  
>HF9\_SSU14296  
ATGCACGTGCAAGCACAAGCCAAATTATGGTGAAGCCGCGAATGGCTCATTACAACAGCTATTGTTTATTGGATTTGATGTTCACTTGG  
ATAACTGTGGTAATTCTAGAGCTAATACATGAAACCTAGCTTTTCCGCAAGGTTAGACGCGCAATTATTAGACTAAAACCAACAGCTT  
TAGCTGATACCTGGTGAATCTGAATAAACCTGCTTATTGCGTAATCAAAGCACTGGCGAAGCATCTTTCAAGTGTCTGCCTTATCAACT  
GTTGAAGGTAGTTTACATGCCTACCATGGTTATAACGGGTAACGGAGAATAAGGGTTTTACTCCGGAGAGGGAGCCTGAGAAATGGCTA  
CCACA  
>HF9\_SSU17250  
ATGCATGTCTAAGTACAGGCCTCACTAAGGTGAAACCGCGAATGGCTCATTAAATCACACCTAATATACTGGATAGTATCAGTTACTTG  
GATAACTGCGGTAATTCTGGAGCTAATACATGCAACAAAGCCCTATTGCAGGGCGCATTTATTAGACAAAACCAATCGGGCTTGCCCG  
CTTATTGGTGGATCTGAATAACTTTGCTAATCGCACAGTCCCTGACTGGCGATGTATCTTTCAAATATCTGCCTTATCAACTGTGAT  
GGTAGCTTACACGACTACCATGGTTGTTACGGGTAACGGAGAATTAGGGTTCGACTCCGGAGAGGGAGCCTGAGAAACGGCTACCACA  
>HF9\_SSU17844  
ATGCACGTCTAAGCACAAGCCAAATTGAAGGTAAAGCCGCGAATGGCTCATTACAACAGCCATTGTTTATTGGATCTGTTTAACTTGA  
TAACTGTGGTAATTCTAGAGCTAATACACGCACATAAGCTCTAACCGTAAGGAAAGAGCGCATTTATTAGAACAAAACCAATCCGGCATT  
TAGCCGTTACTTGGTGAATCTGAATAACTCTGCTAATCGCACAGTCTGACTGGCGATGCATCTTTCAAGTGTCTGCCTTATCAACT  
TTCGATGGTAGTTTATATGCCTACCATGGTTATAACGGGTAACGGAGAATAAGGGTTCGACTCCGGAGAGGGAGCCTGAGAAATGGCTA  
CCACA  
>HF9\_SSU18227  
ATGCATGTCTAAGTACAAGCCTCATTAAGGTGAAACCGCGAATGGCTCATTAAATCACACCTAATGTACTGGACAGTCTCAGTTACTTG  
GATACCTGTGGTAATTCTAGAGCTAATACACGCACAAAAGCCCTGACTTTACGGAAAGGGCGCATTTATTAGAACAAGACCAATTGGCT  
TCGGCCATCCATTGGTGAATCTGAATAACTACCGAGATCGCACGGTCTCGTACCGGCGACATATCTTTCAAGTGTCTGCCTTATCAACT  
TTCGATGGTAGTTTACATGACTACCATGGTTGTAACGGGTAACGGAGAATAAGGGTTCGACTCCGGAGAGGGAGCCTGAGAAACGGCTA  
CCACA  
>HF9\_SSU19963  
ATGCATGTCTAAGCACAAGCCTAATACGGTGAAGCCGCGAATGGCTCATTACAACAGCCCTTGTCTATTTGATGTTGAAAATCTACTTG  
GATAACTGTGAAAAGCCAGAGCTAATACATGCTTACAACTCCGACCTTGGCGAAGGGGTGCATTTATTAGTGCAAAAACCAATCGGGC  
GCTTCGCGTCCCGTGTATGGTGAATCTGAATAACTAAGCCGATCGTACGGTCCGACCGGCGACGAATCATTGAGGTTCTGCCAT  
ATCAACTTTGACGGTAGTTTACGTGACTACCATGGTTATAACGGGTAACGGAGAATAAGGGTTCGACTCCGGAGAGGAGCCTGAGAAA  
CGGCTACTACA  
>HF9\_SSU20251  
ATGCACGTTTTAAATACAAGCCTTAAATGGTGAATCGCGAATAGCTCATTACAACAGCCATTGTTTCTTGGATCTTACTTTCTACTTG  
GATAACTGTGGTAATTCTAGAGCTAATACACGCACAAAAGCTCTATCCGAATGGAAGAGCGCATTTATTAGAATAAACCAATCGGGCTT  
GCCCGTTGTTTGGTGAATCTGAATAACTCCGCAGATCGCATGGTCTAGCACCGGCGACATATCTTTCAAGTGTCTGCCTTATCAACTTT  
CGATGGTAGTTTATGTGACTACCATGGTTGTAACGGGTAACGGAGAATTAGGGTTCGACTCCGGAGAGGGAGCCTGAGAAACGGCTACC  
ACA  
>HF9\_SSU22538  
ATGCATGTGTAAGTACAGACTGTACAACGGTGAAGCTGCGAATGGCTCATTAGATCAGTTATGGTTCCTTAGATCGTACAATCCTACTT  
GGATAACTGTGGTAATTCTAGAGCTAATACATGCACCTTTAGCTCGGACCTCACGGAAAGAGCGCATTTATTAGATCAAACCAATCGGG  
CCTCGGTCCGTGTTTGGTGAATCTGAATAACTCAGTTGATCGCACAGTCTTGTACTGGCGACGTATCTTTCAAATGTCTGCCTTATCA  
ACTTTTCGATGGTAGTTTATACGCTACCATGGTTATAACGGGTAACGGAGAATCAGGGTTCGACTCCGGAGAGGGAGCCTGAGAAATG  
CTACCACA  
>TF1\_SSU676746  
ATGCATGTCTAAGCACAAGCCAAAATGGTGAAGCCGCGAATGGCTCATTACAACAGCCGTAGTTTCTTGGATCTTTCTAATCTACTTG  
GATAACTGTGGTAATTCTAGAGCTAATACACGCACAAAAGCTCTATCCGAATGGAAGAGCGCATTTATTAGAATAAACCGACCGGGTG  
TTCGCACCTGTCGTTTGGCGAATCTGAATAACTGAGCTGATCGCACGGTCTTAGTACCGGCGACACATCTTTCAAGTGTCTGCCTTATC  
AACTGTGATGGTAGTTTATGTGCTACCATGGTTGTAACGGGTAACGGAGAATCAGGGTTCGACTCCGGAGAGGGAGCCTGAGAAATG  
GCTACCACA  
>TF1\_SSU677162  
ATGCATGTCTAAGTACAGCTCTCGTATAGTGAAGCCGCGAATGGCTCATTAAATCAGTTACTATTCTTCTAGATCTTACTTTTGTACTT  
GGATAACTGTGGTAATTCTAGAGCTAATACACGCACAAAAGCTCTGACCTTACGGGAAGAGTGCATTTATTAGAATAAACCAATCGGG  
CTCTGCCTGCTGTTTGGTGAATCTGAATAACTGAGCTGATCGCACTGGTCTAGTACCGGCGACATATCTTTCAAGTGTCTGCCTTATCA  
ACTTTTCGATGGTAGTTTATGTGGCTACCATGGTTGTAACGGGTAACGGAGAATAAGGGTTCGACTCCGGAGAGGGAGCCTGAGAAACGG  
CTACCACA  
>TF1\_SSU681557  
ATGCATGTCTCAGCAGCATGCCTATGAACGGCTAAGCCGCGAATGGCTCATTACAACAGCTATGTTTATTGGGTCTAATCAGTTACTTGG  
ATAACTGTGAAAATCCAGAGCTAATACGTGCACTAACTCCGACCGTAAGGAAGGAGGCATTTTATTAGAATAAACCAATCGGACTTG  
TCCGTGGTTTGTGACTCTGAATAACGGCAGCGATCGTACGGTCTTTGAACCGACGACATATCTTTCAAATGTCTGCCTTATCAACTTT  
CGATGGTAGTTTATGCGCCTACACGGTGTGTAACGGGTAACGGAGAATCAGGGTTCGATTCCGGAGAGGGAGCCTGAGAAATGGCTACC  
ACA

>TF1\_SSU688192  
ATGCATGTCTAAGTCAAGCTGAAATAAAGTGAACCCGGAAGGGCTCATTACAACAGCCGTTGTTTCTGGAGACTCAAATACTTGG  
ATAACTGTGGTAATTCTAGAGCTAATACATGCAGCCAAGCTCTGACCGTAAGGGGAAAGAGTGCATTTATTAGAACAAAACCAATCGGACT  
TGTCCGTAGTTTGGTGAATCTGAATAACCTAGCTGATCGCACAGTCTTTGAACTGGCGACGCATCTTTCAAGTGTCTGCCTTATCAACT  
TTCGATGGTAGTTTATGTGACTACCATGGTTATAACGGGTAATGGAGAATCAGGGTTCGACTCCGGAGAGGGAGCCTGAGAAATGGCTA  
CCACA

>TF1\_SSU692690  
ATGCATGTCTAAGCATAAACCGAATATGGTAAAGCCGGAATGGCTCATTACAACAGCCATAGTTTATTGGATCAGTATTTTCCACTTG  
GATAACTGTGGTAATTCTAGAGCTAATACATGCGATGAAACTCTGACCTTGGTGGAAAGAGTGCATTTATTAGAACAAAACCAATCGGC  
TTTTGTGCTTACTTGGTGAATCTGAATAACTCGGTTGATCGCACAGTCTTTGTACTGGCGACATATCTTTCAAGTGTCTGCCTTATCAA  
CTTTCGATGGTAGTTTATACGACTACCATGGTTTACGGGTTAACGGAGGATTAGGGTTTGACTCCGGAGAGGGAGCCTGAGATATGGC  
TACCACA

>TF1\_SSU694267  
ATGCATGTCTAAGCTCAAGCCGAAAATGGTGAAGCCGGAATGGCTCATTACAACAGCCCTTGTGTTATTTGATCTTGAAAATTACTTGG  
ATAACTGTGGTAATTCTAGAGCTAATACACGCGAAAAAATCGGAACTTCTGTTCCGAGTGCATTTATTAGTACAAGACCAACCGGCGC  
AAGCCGTAATTTGTCGAATCTGAATAACTGAGCCGATCGCATGGCTCGTGCCGCGACATCTTTCAAGTGTCTGCCTTATCAACT  
TTGATGGTAGTTTATGTGACTACCATGGTGTACACGGGTAACGGAGAATAAGGGTTCGACTCCGGAGAAGCAGCCTGAGAAAACGGCTAC  
TACA

>TF1\_SSU694751  
ATGCATGTGTAAGTATAAGCTTTTAGAACGGTGAACCCGGAATGGCTCATTAGATCAGTTAATATTTATTAGATCGTAGAAAGTTACT  
TGGATAACTGTGGTAATTCTAGAGCTAATACACGCAATCAAGCCCTGACCTGACGGGATGGGCGCATTTATTAGAATAAGACCAATTGG  
CTTCGGCCATTTATTGGTACTCTGAATAACTACGCAGATCGCATGGTCTCGTACCGGCGACATATCCTTCAAGTGTCTGCCTTATCAA  
CTTTCGATGGTAGTTTACACGACTACCATGGTTGTAACGGGTAACGGAGAATAAGGGTTCGACTCCGGAGAGGGAGCCTGAGAAAACGGC  
TACCACA

>TF1\_SSU698227  
ATGCATGTCTAAGCACAACCCGATTTATGGTAAAGCCGGAATGGCTCATTACAACAGCCATTGTTTACTGGATCTTGATAAGTTACTT  
GGATAACTGTGGTAATTCTAGAGCTAATACACGCAACAAAGCTCTGACTTTATGGAAGAGCGCATTTATTAGATCAAAAACCAATCAGGC  
TTTGCCTGCTGTTTGGTGAATCTGAATAACTGAGCTGATCGCATTTGGTCTAGTACCGGCGACATATCCTTCAAGTGTCTGCCTTATCAA  
CTGTCGATGGTAGCTTATGTGGTACCATGGTTATAACGGGTAACGGAGAATAAGGGTTCGACTCCGGAGAGGGAGCCTGAGAAAACGGC  
TACCACA

>TF1\_SSU700188  
ATGCATGTCTCAGTACAAGCTGCATTAAGTGAACCCGGAATGGCTCATTACAACAGCCGTTGTTCCCTAGAGACTATCAATACTTGG  
ATAACTGTGGCAATTCTAGAGCTAATACACGCAAGAAAACCCGAACTTGCCTGAGGGGTGCATTTATTAGAACAAAACCAATCGGGGC  
AACCCTGAAGTTGGTGAATCTGAATAACCCAGCTGATCGCACGGTCTTTGCACTGGCGACGCATCTTTCAAGTGTCTGCCTTATCAACT  
TTCGATGGTAGTTTATGTGACTACCATGGTTATAACGGGTAACGGAGAATAAGGGTTCGACTCCGGAGAGGGAGCCTGAGAAAACGGCTA  
CCACA

>TF1\_SSU703579  
ATGCATGTCTCAGTATGAGCTGAAAAAAGTGAACCCGGAATAGCTCATTACAACAGCCATTGTTCACTGGATCTTTGTATCCTACGTG  
GATAACTGTGGCAATTCTAGAGCTAATACATGCAAAAAGCTCCGACCCTCGTTGGGAGGAGCGCATTTATTAGAACAAAACCAATCG  
GGCTTCGGCCTGCTTTTGGTACTCTGAATAACTCAGTTGATCGCACGGTCTCGTACCGGCGACTCATCTTTCAAGTGTCTGCCTTATC  
AACTGTTGATGGTAGTTTACGTGACTACCATGGTTGCAACGGGTAACGGAGAATAAGGGTTCGACTCCGGAGAGGGAGCCTGAGAAAAC  
GCTACCACA

>TF1\_SSU710679  
ATGCATGTCTAAGCATAGGCCGATTAATGGTGAAGCCGGAATAGCTCATTACAACAGCCATAGTTTATTGGATCTTCTCTCATACTTG  
GATACCTGTGGTAATTCTAGAGCTAATACACGCAAGAAAACCCGACTTCGGAAGGGGTGCATTTATTAGAACAAAACCAATCGGACTT  
GTCCGTAGTTTGGTGAATCTGAATAACTCAGCTGATCGCACAGTCTCGCACTGGCGACGATCTTTCAAGTGTCTGCCTTATCAACTT  
TCGATGGTAGTTTATATGACTACCATGGTTGTAACGGGTAACGGAGAATAAGGGTTCGACTCCGGAGAGGGAGCCTGAGAAAACGGCTA  
CACA

>TF1\_SSU734804  
ATGCATGTCTGAGCACAAGCTCAAGAAAAGTGAAGCCGGAATAGCTCATTACAACAGCCACTTTTCACTTGATCTTGATATCCTACTT  
GGATAACTGTGGCAATTCTAGAGCTAATACATGCATTGAAGCTCTGACCAGCTTGTGGGAAGAGCGCATTTATTAGAACAAAACCAAT  
TGGACTTCGGTTCGTAATTGGTACTCTGAATAACTCAGATGATCGCACGGTCTTGTACCGGTGACAGATCATTCAAGTGTCTGCCTTA  
TCAACTGTTGATGGTAGTTTATATGACTACCATGGTTGCAACGGGTAACGGAGAATAAGGGTTCGCTCCGGAGAGGGAGCCTGAGAAA  
CGGCTACCACA

>TF3\_SSU956521  
ATGCGTGTCTAGGTACAAGCCTAAAAACGGTAAAGCCGGAATGGCTCATTACAACAGCCATAGTTTATTGGATCTTGACTATCTTACT  
TGGATAACTGTAGTAATTCTAGAGCTAATACACGCAACAAAGCCAGACCTTACGGAACGGGCGCATTTATTAGACCAAAAACCAATCGG  
GCTTCGGCCCTCTTTGGTACTCTGAATAACTACGCTGAGTGCACGGTCTCGAACCGGCACCGTATCTTTCAAGTGTCTGCCTTATC  
AACTGTGATGGTAGTTTACGTGACTACCATGGTTGTAATGGGTAACGGAGAATAAGGGTTCGACTCCGGAGAGGGAGCCTGAGAAAATG  
GCTACCACA

>TF3\_SSU960449  
ATGCATGTGTAAGTACAAGCTTTTAGAACGGTGAACCCGGAATGGCTCATTAGATCAGTTAATATTTATTAGATCGTAGAAAGTTACT  
TGGATAACTGTGGTAATTCTAGAGCTAATACACGCAAAAAGAACTTGAACCGTAGGTTCCGGGTGCATTTATTAGTACAAGACCATCAGG  
GCTCGTCCCTTCCAATGGTGAATCTGAATAACTGAGCCGATCGCATGGTCTCGCACCGGCGACGATCTTTCAAGTGTCTGCCTTATCA  
ACTTTCGATGGTAGTTTATATGACTACCATGGTTATAACGGGTAACGGAGAATAAGGGTTCGACTCCGGAGAAGCAGCCTGAGAAAACGG  
CTACTACA

>TF3\_SSU966338  
ATGCATGTCTAAGCACAACGAAATTAACGTGAAGCCGGAAGCTCATTACAACAGCCGCTCGTTTCTTGGATCTCCGAACTTACTTGG  
GATAACTGTGGTAATTCTAGAGCTAATACATGCAATCGAGTCTGAGCGTAAGCGATGGGCGCATTTATTAGTACAAGACCAATCGGT  
GCTTGCACCGTGGTTTGGTGAATCTGAATAACTGAGCAGATCGCTTCGGTCTTTGTACCGGCGACGATCTTTCAAGTGTCTGTTTTAT  
CAACTTTCGATGGTAGTTTATATGACTACCATGGTTGTACGGATAACGGAGAATAAGGGTTCGACTCCGGAGAGGGAGCATGAGAAAAC



GGCTACCACA  
>TF4\_SSU144249  
GTGCATGTCTAAGCATGAGCCATCAAAATGGTGAAGCCGCGAACAGCTCATTACAACAGCCATAGTTTCATTGGACTTCTCTCAATACTTG  
GATATCTGTAATAATTTTAGAGCTAATACACGCAAGCAAACCTCCAATCTCACGAGCGGAGTGCATTTATTAGAACAAAACCAATCGGGC  
TTGCCCGTGCCTTTGGTGAATCTGAATAACTCAGCTGATCGCACAGTCTAGCACTGGCGACATATCTTTCAAGTGTCTGCCTTATCAAC  
TGTCGATGGTAGTTTATATGACTACCATGGTTGTAACGGGTAACGGAGAATCAGGGTTTGACTCCGGAGAGGGAGCCTGAGAAACGGCT  
ACCACA  
>TF4\_SSU150234  
ATGCATGTCTAAGCATGAGCCCTATAATGGTGAAGCCGCGAATGGCTCATTACAACAGCCGTTGTTTCTTGGATCTTGATTCACCTGGA  
TAACTGTGGTAATTCTAGAGCTAATACATGCAACTCAGCTCCAACCTGAGAAGAAGGAGCGCATTTATTTGACCAAACTGACTAGGTTT  
CGACCTAAAACCTGGTGAATCTGAATAACTCTGCTGATCACACAGTCTTGCCTGGTGACATATCTTTCAAGTGTCTGCCCTATCAACT  
TTCGATGGTAGTTTATATGCCCTACCGTGGTTGTAACGGGTAACGGAGAATAAGGGTTGACTCCGGAGAGGGAGCCTGAGAAATGGCTA  
CCACA  
>TF5\_SSU410031  
ATGCATGTCTAAGCAGAAGCCGCAATACGGTGAACCCGCGAATAGCTCATTACAACAGCCCTTAGTTTCTTGGATCTTCAACAGTTACTT  
GGATAACTGTGGTAATTCTAGAGCTAATACACGCATGAAAATCTCGGCTTTGCGGTTGGGATGCATTTATTAGTACAAAACCAATCGAG  
CGCGAGCTCGTTGTTGGTGAATCTGAATAACTTTGCTGATCGCACGCTCTTCGTAGTGGCGACGCATCTTTCAAGTGTCTGGCTTATCA  
ACTTTGATGGTAGTTTATACGACTACCATGGTTGTAACGGGTAACGGAGAATAAGGGTTGACTCCGGAGAGGGAGCCTGAGAAACGG  
CTACCACA  
>TF5\_SSU419519  
ATGCATGTCTAAGCACAAGCCGAAAATGGTAAAGCCGCGAATGGCTCATTACAACAGCCCTTGTGTTATTTGATCTTGAATCCTACTTG  
GATAACTGTGGTAATTCTAGAGCTAATACACGCATCTAACTCGAGACGCCCTCAGGAGTGCATTTATTAGTACAAAACCAATCGGGC  
TTGCCCGTCTTTGGTGAATCTGAATAACTGAGCCGATCGCACGCTCATTGTACCGGCGACGTATCTTTCAAGTGTCTGCCCTATCAAC  
TTTCGATGGTAGTTTATATGACTACCATGGTTATAACGGGTAACGGAGAATAAGGGTTGACTCCGGAGAAGCAGCCTGAGAAACGGCT  
ACCACA  
>TF5\_SSU430294  
ATGCATGTCTAAGCATAAACTAACTAAAGTGAAGCCGCGAATAGCTCATTACAACAGCCGTTGTTTCTTGGATCTCCGTATTACTTGG  
ATAACTGTGGTAATTCTAGAGCTAATACACGCAATCGAGCTCCGACCTTACGGGACGAGCGCATTTATTAGTACAAAACCAATCAGTGC  
TTGCACTGTAGTCTGGTGAATCTGAATAACTGAGCAGATCGCTTCGGTCTTGGTACCGGCGACATATCTTTCAAGTGTCTGCCCTATCA  
ACTTTGATGGTAGTTTATATGCTCCTACCATGGTTGTAACGGGTAACGGAGAATAAGGGTTGACTCCGGAGAGGGAGCCTGAGAAACGG  
CTACCACA  
>TF5\_SSU437076  
ATGCATGTGTAAGTACAAGCTTTTAGAACTGTGAAACCCGCGAATGGCTCATTAGATCAGTTAATATTTATTAGATCGTAGAAAGTTACT  
TGGATAACTGTGGTAATTCTAGAGCTAATACACGCCTTGAAGCTCTGACCTTCGGGGACGAGCGCATTTATTAGAACAAAACCAATGGG  
GTTTGCCTTCGGTGGTGAATCTGAATAACTTCCGATCGCACGGTCTCGCACCGGCGACGCATCTTTCAAGTGTCTGCCCTATCAA  
CTGTCGATGGTAGTTTATGTGCTCCTACCATGGTTGTAACGGGTAACGGAGAATAAGGGTTGACTCCGGAGAGGGAGCCCGAGAACGGC  
TACCACA  
>TF5\_SSU444034  
ATGCATGTCTAAGCACAAGCCGCTTGATGGTAAAGCCGCGAATGGCTCATTACAACAGCTATTGTTTATTAGATCTTACCATCCTACTT  
GGATAACTGTGGTAATTCTAGAGCTAATACACGCATCAAAAACGGGACCTAAGGGAACCGTTGCATTTATTAGAACAAAACCAATCGGG  
CTTCGGCCGTCATTTGGTGAATCTGAATAACTCTGCCGATCGCACGGTCCACGAACCGGCGACGCATCTTTCAAATGTCTGCCCTATC  
AACTTTGATGGTAGTTTATGCGCTCCTACCATGGTTGTAACGGGTAACGGAGAATAAGGGTTGACTCCGGAGAGGGAGCCTGAGAAACG  
GCTACCACA  
>TF5\_SSU446087  
ATGCATGTCTAAGCAGAAGCCGAACAATGGCAAAGCCGCGAATGGCTCATTACAACAGCTGTTGTTTATTTGATCTTGAATCCTACAT  
GGATAACTGTGGTAATTCTAGAGCTAATACATGCTTACAACTCATTTCTTGGATCTGAGTGCATTTATTAGAACAAAACCAATCGGG  
CTTGCCTGCTCATTGGTGAATCTGAATAACTATGCCGATCGCACGGTCTTCGCACCGGCGACGTATCTTTCAAGTGTCTGCCCTATCAA  
CTTTGATGGTAGTTTATGTGACTACCATGGTTATAACGGGTAACGGAGAATAAGGGTTGACTCCGGAGAGGGAGCCTGAGAAATGGC  
TACTACA  
>TF5\_SSU453472  
ATGCATGTCTCAGCACAAGCCAATATATGGTAAAGCCGCGAATGGCTCATTACAACAGCCACTGTTTATTAGATCATCCTTCTTACTTG  
GATAACTGTGAAAAGCTAGAGCTAATACATGCTACAAGCTCTGACCTTACGGAAGGAGCGCATTTATTAGAACAAAACCAATCGGACT  
TTGTCCGTCATTTGGTGAATCTGAATAACTATGCAGATCGCACGGTCTTAGAACCGGCGACATATCTTTCAAATGTCTGCCCTATCAAC  
TTTCGACGGTATGTGATATGCTTACCGTGGTTGCAACGGGTAGCGGGGAATCAGGGTTGACTCCGGAGAGGGAGCATGAGAAACGGCT  
ACCACA  
>TF5\_SSU457543  
ATGCATGTGTAAGCATAAGCCGATTAATGGTGAAGCCGCGAATGGCTCATTACAACAGCCATAGTTTATTATATTTTTTCTTTTACTT  
GGATAACTGAGGTAATTCTTGGAGCTAATACACGCATCAAAGCTTCGACCTTACGGAAGGAGCGCATTTATTAGAACAAAACCAATCGGA  
CTTCGGTCCGTTACTTGGTGAATCTGAATAACTCTGTGGATCGCATGGTCTTAGCACCGGCGACGTATCTTTCAAGTGTCTGCCCTATC  
AACTTTGCTTGGTGAATTTATGTGATTACCAAGGTTGTAACGGGTAACGGAGAATAAGGGTTGATTCCGGAGAGGGAGCCTGAGAAATG  
GCTACCACA  
>TF5\_SSU459305  
ATGCATGTCTTAGTACAGACTATCTCACAGTGAAGCTGCGAATGGCTCATTAAATCAGCTAAGGTTTCTTGGATCTCCGTCTTACTTGG  
GATACCTGTGGTAATTCTACAGCTAATACACGCATCAAAAACCAACCTTACGGTGGGGTGCCTTTGTTACTTCAAACCAATCGGACTT  
CGGTCTGAAATCAAGTATATGAACAATTTAGCTGATCGCACGGTCTGAGAACCGGCGACATATCTTTCAAATGTCTGCCCTATCAAC  
TTTCGATGGTAGATTACGCGCTACCATGGTTGTAACGGGTAACGGAGAATAAGGGTTGATTCCGGAGAGGGAGCCTGAGAAACGGCT  
ACCACA  
>TF5\_SSU466315  
ATGCATGTCTAAGCATAAACTAATCTAAAGTGAAGCCGCGAATAGCTCATTACAACAGCCGTTGTTTCTTGGATCTCCGTCTTACTTGG  
ATAACTGTGGTAATTCTAGAGCTAATACATGCAACTCAGCTGAGATCTGACTTTACAGGAAGATCGCATTTATTAGATCAAAAACCAATCGGCTT  
CGGCCGTTGCTGGTGAATCTGAATAACTACGAGATCGCTTAGGTTTTATACCGGCGACGTGTCTTCAAGTGTCTGCCCTATCAACTT

TCGATGGTAGTTTCTACGCCTACCATGGTTGCGACGGGTAACGGAGAATCAGGGTTCGATTCCGGAGAGGGAGCCTGAGAAACGGCTAC  
 CACA  
 >TF6\_SSU33463  
 ATGCATGTGTAAGCATGAACCATTTAATGGTGAAGCCGCGAATGGCTCATTACAACAGCCATAGTTTATTAGATTTCTTTTTACTTGG  
 ATAAGTGTGGTAATTCTAGAGCTAATACACGCAGCAAAGCTTCGACCTTACGGGAAGGAGCGCATTATTAGAACAAAGCAATCGTACT  
 TCGGTACGTATTTGGTGAATCTGAATAACTTAGTCGATCTCATGGTCTTAGCACCGGAGACGCATCTTTCAAGTGTCTGCCTTATCAA  
 CTTTTCGATGGTAGTTTATGCGCCTACCATGGTTGTAACGGGTAACGGAGAATCAGGGTTTGATTCCGGAGAGGGAGCCTGAGAAATGGC  
 TACCACA  
 >TF6\_SSU33935  
 ATGCATGTCTAAGCAGAAGCCGAACAATGGCAAAGCCGCGAATAGCTCATTACAACAGCCATTGTTTACTTGATCTTGAAATCCTACTT  
 GGATAACTGTGGTAATTCTAGAGCTAATACACGCAATAAGCTCCGACCTCAGGGGAGGAGTGCATTTATTAGAACAAAACCAATCAGAC  
 CTCGGTCTGTCTCTGGTGAATCAGAATAACTCAGCTGATTGCACAGTCTTGTACTGGCGACGTATCTTTCAAGTGTCTGCCTTATCAA  
 CTGTTGATGGTAGTTTATGCGACTACCATGGTTGTAACGGGTAACGGAGAATAAGGGTTCGACTCCGGAGAGGGAGCCTGAGAAACGGC  
 TACCACA  
 >TF6\_SSU36442  
 ATGCATGTCTAAGCACAAGCCGAATATGGTGAAGCCGCGAATGGCTCATTACAACAGCCTTTGTTTATTGATCTTGAAATCCTACTTG  
 GATAACTGTGGTAATTCTAGAGCTAATACACGCAACAAAACCTTGAACGTAAGTCTTGGTGCATTTATTAGTACAAAACCTTCCGGAC  
 TTCGGTTCGTAACCTGGTGAATCTGAATAAATTAGCCGATCGCATGGCCTTCGCGCTGGCGACGTATCTTTCAAGTGTCTGCCCTATCA  
 ACTTTTCGATGGTAGTTTATATGACTACCATGGTTATAACGGGTAACGGAGAATAAGGGTTCGACTCCGGAGAAGCAGCCTGAGAAACGG  
 CTAATA  
 >TF6\_SSU37421  
 ATGCATGTGTAAGTACAAGCTTTTAGAACGGTGAACCCGCGAATGGCTCATTAGATCAGTTAATATTTATTAGATCGTAGAAAGTTACT  
 TGGATAACTGTGGTAATTCTAGAGCTAATACATGCAACCAAGCTCCAACCTTTCCGGAAGGAGCGCATTATTATACCAAGACCAATCGG  
 GCTTTGCCCGCTATCTGGTACTCTGAATAACTTTGCTGATCAGTGGTTCATAGTACCGGTGACATATCTTTCAAGTGTCTGCCCTATC  
 AACTTTTCGATGGTAGTTTATGTCCTACCATGGTTGTAACGGGTAACGGAGAATAAGGGTTCGACTCCGGAGAGGGAGCCTGAGAAATG  
 GCTACCACA  
 >TF6\_SSU41803  
 ATGCATGTCTAAGTACAAGCCTCATTAAGGTGAACCCGCGAATGGCTCATTAAATCACACCTAATATACTGGATAGTATACAGTTACTT  
 GGATAACTGCGTAATTCTAGAGCTAATACATGCAGCTGAGATCTGACTTTACAGGAAGATCGCATTTATTAGATCAAACCAATCGGC  
 TTCGGCCGTTGCTGGTGAATCTGAATAACTACGCAGATCGCTTAGGTTTTATACCGGCGACGTGTCTTCAAGTGTCTGCCTTATCAAC  
 TTTTCGATGGTAGTTTCTACGCCTACCATGGTTGCGACGGGTAACGGAGAATAGGGTTCGACTCCGGAGAGGGAGCCTGAGAAACGGCT  
 ACAACA  
 >TF6\_SSU47996  
 ATGCATGTCTAAGCACAACCTGATTAATTGTGAAGCCGCGAATGGCTCATTACAACAGCCATTGTTTACTGGATATCTCATTACTACAT  
 GGATAACTGTGGTAATTCTACAGCTAATACACGCATCAAACCCCACTTTGAAAGGGGTGCGTTTGTACTTCAAATCAATCGGACTT  
 CGGTCTGGTTTTCAACTGAGATTGAACAATTTAGCTGATCGCACGGTCTAAGAACCAGGCGACATATCTTCAAACGTCTGCCTTATCAAC  
 TTTTCGATGGTAGATTATGCGCCTACCATGGTTGTTACGGGTAACGGAGAATCAGGGTTTGATTCCGGAGAGGGAGCCTGAGAAACGGCT  
 ACCACA  
 >TF6\_SSU48167  
 ATGCATGTCTAAGCAGAAGCCGACCAATGGTAAAGCCGCGAATGGCTCATTACAACAGCCGTCGTTTCTTGGATCTCTTGTTTTTACTTG  
 GATAACTGTGGTAATTCTAGAGCTAATACACGCCTAAAGCTCTGACCTTACGGGACGAGCGCATTATTAGAACAAAACCAATCGGGT  
 TTCGGCCCGTCCGTTGGTACTCTGAATAACTACGCCGATCGCACGGTCTCGTACCAGGCGACGTATCTTTCAAGTGTCTGCCTTATCAA  
 CTTTTCGATGGTAGTTTATGTCCTACCATGGTTGTAACGGGTAACGGAGAATAAGGGTTCGACTCCGGAGAGGGAGCCTGAGAAACGGC  
 TACCACA  
 >TF6\_SSU53456  
 ATGCATGTCTAAGTATGAACCTATCTATTGTGAAACCCGCGAATGGCTCATTACAACAGCCATAGTTTACTGGATATATTCCTTTACATGG  
 ATAAGTGTGGTAATTCTACAGCTAATACACGCATCAAAGCCCCGACTTTATGAAGGGGCGCGTTAGTTACTTCAAACCGATCGGTCTTC  
 GGACTGTATCCAAGTGAAGTGAACCTATTTAGCTGAGCGCACGGTCTAAGCACCGGCGCCATATCTTCAAATGTCTGCCTTATCAACT  
 TTCGATGGTAGATTATGCGCCTACCATGGTTGTAACGGGTAACGGAGAATCAGGGTTTGATTCCGGAGAGGGGGCCTGAGAAATGGCCA  
 CCACA  
 >TF6\_SSU54250  
 ATGCACGTTTTCAATACAAGCCTTACTAAGGTGAATCGCGAATGGCTCATTACAACAGCCATTGTTTCTTGGATCTTATCTTTTTACTTG  
 GATAACTGTGGTAATTCTAGAGCTAATACGTCACCAATCCCGACGCAAGAAGGGATGCATTTATTAGAACTAAACCGACCGGGCTCA  
 GCCCGCTGTTTGGTGAATCTGAATAACTCTGCAGATCGCATGGTCTCGCACCGGCGACATATCTTCAAAGTGTCTGCCTTATCAACTTT  
 CGATGGTAGTTTATGTCGACTACCATGGTTGTCACGGGTAACGGAGAATAGGGTTCGACTCCGGAGAGGGAGCCTGAGAAACGGCTACC  
 ACA  
 >TF6\_SSU58877  
 ATGCATGTCTAAGCACAAGCCGAAAATGGTAAAGCCGCGAATGGCTCATTACAACAGCCTTTGTTTATTGATCTTGAAATCCTACTTG  
 GATAACTGTGGTAATTCTAGAGCTAATACAAGCGATTAAACTCCAACCTTTTGGGAAGGAGTGCATTTATTAGTACAAAACCAATCGGGG  
 TAAAACCCGTTGGTTTGGTAAATCTGAATAACTCTGTGATCGCACGGTCTTGTACCGGCGACATATCTTTCAAAGTGTCTGCCCTATCA  
 ACTGTGCGATGGTAGTTTATATGACTACCATGGTTGTAACGGGTAACGGAGAATAAGGGTTCGCTCCTCCGGAGAAGCAGCCTGAGAAACGG  
 CTAATA  
 >TF6\_SSU74955  
 ATGCATGTCTAAGCATGAGCCATCAAATGGTGAAGCCGCGAACAGCTCATTACAACAGCCATAGTTTACTTGACTTCTCTCAATACTTG  
 GATATCTGTAATAATTTTAGAGCTAATATACGCAAGCAAACCTCAATCTCACGAGCGGAGTGCATTTATTAGAACAAAACCAATCGGGC  
 TTGCCTGTGCGTTTGGTGAATCTGAATAACTCAGCTGATCGCACAGTCTAGCACTGGCGACGTATCTTTCAAATGTCTGCCCTATCAAC  
 TTTTCGACGGTATGTGATATGCTTACCGTGGTTGCAACGGGTAGCGGGGAATCAGGGTTCGATTCCGGAGAGGGAGCATGAGAAACGGCT  
 ACCACA  
 >TF6\_SSU82210  
 ATGCATGTCTATGCATAAGCCAAATTTATGGTGAAGCCGCGAATGGCTCATTACAACAGCCTTTTATTCTTGGGTGTCAATTTACTTGG  
 TAACCTTTGTCAACCCAGAGCTAATACATGCACAAAAGCCTTGACTTATGGAAAGGCGCAGTTATTTGATCAAACCAATCAGGCTTGCC

TGAATTTGATGACTCTGAGTAACTTGCAGATCGCACAGTCCCTAGTACTGGCGACAACTCTTCAAGTGTCTGCCTTATCAACTTTCGA  
 TGGTAGTTTCAGTGCCTACCATGGTTACAATGGGTAACGGAGAATAAGGGTTCGACTCCGGAGAGGGAGCCTGAGAAACGGCTACCACA  
 >TF6\_SSU84268  
 ATGCATGTCTCAGTGCAAGTCCATTTCAGGACGAAACCGCGAACGGCTCATTACAACAGCTATAATCTACGGGGAGTTCCATACATGGA  
 TAACTCTGTCAACCCAGAGCTAATACATGCACAAAAGCCTCACCTCATGGCTGGGCGCATCTATTATAACAAAACCAACCGGGCTCTGC  
 CCGAGTCTTGGTACTCTGAATAGAGAGTTAATGACGCAGTCTTAGTACTGGTCATGTTCCCCACGAGTGTCTGCCTTATCAACTTTCG  
 ATGGTAGTTTATGTGCCTACCATGGTTGCAACGGGTAACGGAGAATAAGGGTTCGACTCCGGAGAGGGAGCCCCGAGAAACGGCTACCAC  
 A  
 >TF6\_SSU98667  
 ATGCATGTTCCAGCAGAACTGAATATAGTGAAGCCGCGAATAGCTCATTACAACAGCCATTGTTTCATTGGAGTTGAAGACAATTTGGA  
 TAACCCTGTTAAATCAGAGCTAATACACGCAAAAAGCTTGTCTTTGCGGTTTAAAGTGCATTTATTAGAACAAAATCATCCGGCCTTT  
 GGCCGTATTTGGTGAATCTGAATAACTTTGCTGATCGCACGGTCTAGTACTGGCGACGTATCTTTCAAGTGTCTGCCTTATCAACTTTC  
 GACGGTAGTTTATGTGCCTACCGTGGTTATAACGGGTAACGGAGAATTAGGGTTCGACTCCGGAGAGGGAGCCTGAGAAATGGCTACCA  
 CA  
 >TS1\_SSU270885  
 ATGCATGTCTAAGCACAAGCTGAAAATGGTGAAGCTGCGAATGGCTCATTACAACAGCCTTTGTTTATTTGATCTTGAATCCTACTTG  
 GATAACTGTGGTAATTCTAGAGCTAATACATGCTATCAAACCTGAAGGCTCTGCCTTCAGTGCATTTATTAGTACAAAACCAATCAGGTT  
 TTACCTGCCAATTTGGTGAATCAGAATAACTGTGCAGATCACATAGCCTATGAGCTGGTGACATATCTTTCAAGTGTCTGCCTTATCAAC  
 TTTTCGATGGTAGTTTATATGACTACCATGGTTATAACGGGTAACGGAGAATAAGGGTTCGACTCCGGAGAAGCAGCCTGAGAAATGGCT  
 ACTACA  
 >TS1\_SSU284163  
 ATGCATGTCTAAGCACAAGCCGAATATGGTGAAGCCGCGAATGGCTCATTACAACAGCCTTTGTTTATTTGATCTTGAATCCTACTTG  
 GATAACTGTGGAAATTCAGAGCTAATACACGCAAAAAGAACTCGGAACGTAGGTTCCGGGTGCATTTATTAGTACAAAGCCATCAGGGC  
 TCGTCCCTTCCAATGGTGAATCTGAATAACTGAGCCGATCGCATGGTCTCGCACCGGCGACGTATCTTTCAAATGTCTGCCTTATCAAC  
 TTTTCGACGGTATGTGATATGCTTACCGTGGTTGCAACGGGTAGCGGGGAATAAGGGTTCGATTCCGGAGAGGGAGCATGAGAAACGGCT  
 ACCACA  
 >TS2\_SSU821962  
 ATGCAAGTCTAAGCACAAGCCGTACAATGGTAAAGCCGCGAATAGCTCATTACAACAGCCATAGTTTATTAGATAGTTCTTTACTACAT  
 GGATAACTGTGGTAATTCTAGAGCTAATACATGCTACAAAACGGGACCTTTAGTTAGGAAGCCGCGCTTTTATTAGAACAAAACCAATC  
 GCTCTTTCCGGGAGCGTCAATTTGGTGAGTCTAAAATAACATAGCAGATCGCACGGTCTGGGCACCGGCGACGAATCTTTCAAATGTCTGCC  
 TTATCAACTTTCGATGGTAGTTTACATGCCTACCATGGTGATAACGGGTAACAGAGAATAAGGGTTCGACTCTGGAGAGGCAGCCTGAG  
 AGACGGCTACCACA  
 >TS2\_SSU823349  
 ATGCATGTCTAAGTACAGACTATATCACAGTGAAGCTGCGAATGGCTCATTAAATCAGCTAAGGTTCCCTTAGATCGTACAATCCTACAT  
 GGATAACTGTGGTAATTCTAGAGCTAATACATGCTACAAAACGGGACCTTTAGTTAGGAAGCCGCGCTTTTATTAGAACAAAACCAATC  
 GCTCTTTCCGGGAGCGTCAATTTGGTGAGTCTAAAATAACATAGCAGATCGCACGGTCTTGGCACCGGCGACGAATCTTTCAAATGTCTGCC  
 TTATCAACTTTCGATGGTAGTTTACATGCCTACCATGGTGATAACGGGTAACAGAGAATAAGGGTTCGACTCTGGAGAGGCAGCCTGAG  
 AGACGGCTACCACA  
 >TS3\_SSU475561  
 ATGCATGTCTAAGCACAAGCTGAAATAAAGTGAAGCCGCGAATAGCTCATTACAACAGCCATTGTTTACTTGTCTTGAATCCTACTTT  
 GGATAACTGTGGTAATTCTAGAGCTAATACACGCAATTAAGCTCTGATCCTTTTGGTGACGAGTGCATTTATTAGAACAAAACCAATCG  
 GACTTCCGGTCTGTTGTTGGTGAATCTGAATAACTCAGCTGATCGCACGGTCTTGTACCGGTTGACGATCTTTCAAGTGTCTGCCCTATC  
 AACTTTCCGAGCGTATGTGATATGCTTACCGTGGTTGCAACGGGTAGCGGGGAATCAGGGTTCGATTCCGGAGAGGGAGCATGAGAAACG  
 GCTACCACA  
 >TS3\_SSU489684  
 ATGCATGTCTAAGCACAAGCCGAATATGGTGAAGCCGCGAATGGCTCATTACAACAGCCTTGGTTTATTTGATCTTGAATCCTACATG  
 GATAACTGTGGTAATTCTAGAGCTAATACACGCATACAAGCTTCAGCCTTACGGCTGTGAGCGCATTTATTAGTACAAAACCAATCCGG  
 CCTTGCCCGTTGTTTGGTGAATCTGAATAACTGAGCCGATCGCATGGTCTCTGTACCGGCGACGTATCATTCAAGTGTCTGCCCTATCA  
 ACTTTCGATGGTAGTTTATGTGACTACCATGGTTACAACGGGTAACGGAGAATAAGGGTTCGACTCCGGAGAGGGAGCCTGAGAAACGG  
 CTTACTACA  
 >TS3\_SSU503133  
 ATGCAAGTCTAAGCACAAGCCGTTAAATGGTAAAGCCGCGAATAGCTCATTACAACAGCCATAGTTTATTAGATAGTTCTTTACTACAT  
 GGATAACTGTGGTAATTCTAGAGCTAATACATGCTTAAAAGAAGCCTCGCAAGAGGTTGTTCTGCACTTATTAGAACAAAACCAATC  
 GCGCTGCGGCAACGTAGTGCCTTATTTGGTGAATCTGAATAACTTGGCGGATCGCACGGTCTAGTACCGGCGACGCATCTTTCAAATGT  
 CTGCCTTATCAACTGTGATGGTAGTTTACATGCCTACCATGGTGATAACGGGTAACAGAGAATAAGGGTTCGACTCTGGAGAGGGAGC  
 CTGAGAGACGGCTACCACA  
 >TS3\_SSU508400  
 ATGCAGGTCTGAGCAGAGCTCAAGAAAATAATGGATGGATAATTGGATAACTGTGGCAATTCAGAGCTAATACATGCATTGAAGCTC  
 CGACCAGCTTGTGGGAAGAGCGCATTTATTAGAACAAAACCAATCGGACTTCCGGTTCGTTATTGGTACTCTGAATAACTCAGTCCGAT  
 CGCACGGTCTTGTACCGGCGACAGATCATTCAAGTGTCTGCCTTATCAACTGTTGATGGTAGTTTATGTGACTACCATGGTTGCAACGG  
 GTAACGGAGAATAAGGGTTCGCTCCGGAGAGGGAGCCTGAGAAATAGCTACCACA  
 >TS4\_SSU543236  
 ATGCATGTCTCAGCACATACCAATATATGGCAAAGCCGCGAATGGCTCATTACAACAGCCGATTTTATTAGATAATCCTATTTACTTG  
 GATAACTGTGGAAAACTAGAGCTAATACATGCTATAAGCTTCGACCTTACGGAAGAAGTTTATTATTAGAACAAAACCAATCCGACT  
 TTGTCCGTTACTTTGTTGACTCTGATTAACCTCATGATCGCACGGTCTAGTAACCGGCGACATATCTTTCAAATGTCTGCTTTATCAAC  
 TTTTCGATGGTAGTTTATGCGCTACCATGGTTGTAACGGGTAACGAAGAATCAGGGTTCGATTTCGGAGAGGGAGCCTGAGAAACGGCT  
 ACCACA  
 >TS4\_SSU544032  
 ATGCATTTCTAAGCACAAGCCGAATATGGTGAAGCCGCGAATGGCTCATTACAACAGCCTTTGTTTATTTGATCTTGAATCCTACTTG  
 GATAACTGTGGTAATTCTAGAGCTAATACACGCAAAAAGAACTCGGAACGTAGGTTCCGGGTGCATTTATTAGTACAAAGCCATCAGGGT  
 TCGTCCCTTCCAATGGTGAATCTGAATAACTGAGCCGATCGCATGGTCTCGCACCGGCGACGTATCTTTCAAGTGTCTGCCCTATCAAC

TTTCGATGGTAGTTTATATGACTACCATGGTTATAACGGGTAACGGAGAATAAGGGTTCGACTCCGGAGAAGCAGCCTGAGAAACGGCT  
ACTACA  
>TS5\_SSU874117  
ATGCATGTATCAGCACAAGCCGTAATATGGTGAAGCCGCGAATAGCTCATTATAACAGTCGTAGTTTATTAGAAAGTCTGTACTGGATA  
ACTGTGGTAATTCCAGAGCTAATACATGTTCCAAAGCCCAACTAACGAAGGGTGCATTTATTAGAACAAGGCCGATCAGACTTTGTCT  
GTCTCAGGTTGACTCTGAATAACTTTGCTAATCGCACAGTCTTTCGACTGGCGATGATATCTTTCAATGTCTGCCCTATCAACTTTCGA  
CGGTATGTGATATGCTTACCGTGGTTGCAACGGGTAGCGGGGAATCAGGGTTCGATTCCGGAGAGGGAGCATGAGAAACGGCTACCACA  
>TS5\_SSU875407  
ATGCATGTCTAAGTACAGACTATATCACAGTGAAGTGCGAATGGCTCATTAAATCAGCTAAGGTTCCCTTAGATCGTACAATCCACTT  
GGATAACTGTGGTAATTCTAGAGCTAATACACGCCTTGAAGCTCTGACCTTCGGGGACGAGCGCATTTATTAGAACAAAACCAATGGGG  
TTCGCCCTCGGTTGGTGAAGTACTCCGATCGCACGGTCTCGCACCAGGCGACGCATCTTTCAAGTGTCTGCCTTATCAAC  
TGTCGATGGTAGTTTATGTGCCTACCATGGTTGTAACGGGTAACGGAGAATAAGGGTTCGACTCCGGAGAGGGAGCCGAGAAACGGCT  
ACCACA  
>TS5\_SSU881546  
ATGCATGTCTAAGCAGAAACTATTTTAAAGTGAAGCCGCGAAAAGCTCATTACAACAGCCGTCGTTTCTTGGGTCTCCGAATTTACTTG  
GATAACTGTGGTAATTCTAGAGCTAATACATGCAATCGAGCTCTGAACGTAAGTATGGGCGCATTTATTAGTAACAAAACCAATCGGT  
TGCTTGAACCGTGGTTTGGTGAATCTGAATAACTTAGCAGATCGCTTCCGTTCTTTGTACCGGCGACATATCTTTCAAATGTCTGCCT  
ATCAACTTTCGATGGTACGTTATGCGCCTACCATGGTCTGTAACGGGTAACGGAGAATCAGGGTTCGATTCCGGAGAGGGAGCCTGAGAA  
ATGGCTACCACA  
>TS5\_SSU900338  
ATGCATGTCTATGCACAAGCCGATAAAATGGCAAAGCCGCGAATGGCTCATTACAACAGCCACTGTTCACTTGATCTGTATCATATCCTA  
CTTGGATAACTGTGGTAATTCTAGAGCTAATACACGCACCCATTCTCCGACCAGGAGGACGAGAGCATTTATTAGAACAAAACCAATC  
GGCTTCGGTTCGTTTGGTGAATCTGAATAACTTTGCTGATCGTACGGTCTTTGTACCGACGACGCATCTTTCAAATGTCTGCCTTAT  
CAACTTTCGATGGTAAAGTTCCTTGCTTACCATGGTCTGTAACGGGTAACGGAGAATCAGGGTTCGACTCCGGAGAGGGAGCCTGAGAAAC  
GGCTACCACA  
>TS5\_SSU901243  
ATGCATGTCTATGCACACGCCGATTAATGGTAAAGCCGCGAATAGCTCATTACAACAGCCCTCTGTTTATTAGATCTTTTTATCCTACTT  
GGATAACTGTGGCAATTCTAGAGCTAATACACGCACCAAACTCCGACCTTCCGGAAGGAGTGCATTTATTAGACCAAAAACCAATGCAG  
GCTTTCGGTTCGTTTGGTGAATCTGAATAACTTTGCTGATCGTACGGTCTTTGTACCGACGACGCATCTTTCAAATGTCTGCCTTAT  
TCAACTTTCGACGGTAGTTTATATGACAACCGTGGTTGTAACGGGTAACGGGAATCAGGGTTCGATTCCGGAGAGGGAGCATGAGAAA  
CGGCTACCACA  
>TS6\_SSU559765  
ATGCATGTCTTAGTACAGACTATCTCACAGTGAAGTGCGAATGGCTCATTAAATCAGCTAAGGTTCCCTTAGATCGTACAATCCACTT  
GGATAACTGTAGTAATTCTAGAGCTAATACATGCTTAAAAGAACGACCTCGCAAGAGGTTGTTCTGCACTTATTAGAACAACCAATC  
CGCTTCGGCAACGTAAGTTCGTTTATTTGGTGAATCTGAATAACTTTGGCGGATCGCACGGTCTAGTACCGGCGACGCATCTTCAAATGT  
CTGCCTTATCAACTGTCTGATGGTGTAGTTTACATGCCTACCATGGTGATAACGGGTAACAGAGAATAAGGGTTTACTCTGGAGAGGGAGC  
CTGAGAGACGGCTACCACA  
>TS6\_SSU570763  
ATGCATGTCTAAGTACAGACTATATCACAGTGAAGTGCGAATGGCTCATTAAATCAGCTAAGGTTCCCTTAGATCGTACAATCCACTT  
GGATAACTGTAGTAATTCTAGAGCTAATACACGCATCAAGCTCTGACCTCATGGAAATGAGCGCATTTATTAGAACAACCAATCAGG  
CTATGCCTGTTTTTGGTGGATCTGAATAACTCAGCTGACCGTATGCTCTCGTAGCGACGGCGATTCCCTCAAAGTATCTGCCTTATCAAC  
TGTTGATGGTAGTTTATGTGACTACCATGGTTGTAACGGGTAACGGAGAATAAGGGTTCGACTCCGGAGAGGGAGCCTGAGAAACGGCT  
ACCACA  
>TS6\_SSU587229  
ATGCATGTCTAAGCATAAATGAATTCATAGTGAAGCCGCGAATAGCTCATTACAACAGCCATCGTTTAAATGGATATATTTTTACATGGA  
TAACTGTGGTAATTCTACAGCTAATACACGCATCAAAACCCAACTTACGGTGGGTGCGTTTGTACTTCAAACCAATCGGACTTCGG  
TCTGAAATCAAGTATTTGAACAATTTAGCTGATCGCACGGTCTGAGAACCGGCGACATATCCTTCAAATGTCTGCCTATCAACTTTC  
GATGGTAGATTACGGCCTACCATGGTTGTAACGGGTAACGGAGAATCAGGGTTTATTCCGGAGAGGGAGCCTGAGAAACGGCTACCA  
CA  
>HE6\_SSU372021  
ATGCATGTCTAAGCACAACCTTTATGAGTGAAGCCGCGAAAAGCTCATTACAACAGCCGTCGTTTCTTGGATCTCCATTCTCTACTTGG  
ATAACTGTGGTAATTCTAGAGCTAATACATGCGATCAAGCTCCGAACTCACGTGACGAGTGCATTTATTAGAACAAGACCATCCGGCTT  
CGGCCGTTCTTTGGTGAAGTACTCTGAATAACTACGCGAATCACATGGTCTCGCACCAGGATGATGATCTTTCAAAGTGTCTGCCTTATCAACT  
TCCGATGGTAGTTTATGTGCCTACCATGGTTGTAACGGGTAACGGGAATAGGGTTCGATTCCGGAGAGGGAGCATGAGAAACGGCTA  
CCACA
